# Supplementary material for: One-class land-cover classification using MaxEnt: the effect of modelling parameterization on classification accuracy
Source: PeerJ. 2019 May 27;7:e7016. doi: 10.7717/peerj.7016 (PMC6542344; doi:10.7717/peerj.7016)
Supplement: Supplemental Information 2 [file peerj-07-7016-s002.xlsx]

## Sheet: SummaryTableBuilt
Class	Serie	Parameter	Samples	Training	Testing	Feature	Regularization	Threshold	TP	FP	FN	TN	Total	Kappa
Built	S40T50T50	Auto	40	50	50	Auto	1	BTOPA	519	11	105	365	1000	0.764496
Built	S40T50T50	Auto	40	50	50	Auto	1	EETOD	440	6	184	370	1000	0.629912
Built	S40T50T50	Auto	40	50	50	Auto	1	ETeSS	382	5	242	371	1000	0.532218
Built	S40T50T50	Auto	40	50	50	Auto	1	ETrSS	373	5	251	371	1000	0.517214
Built	S40T50T50	Auto	40	50	50	Auto	1	FC1	540	14	84	362	1000	0.798606
Built	S40T50T50	Auto	40	50	50	Auto	1	FC5	477	6	147	370	1000	0.696559
Built	S40T50T50	Auto	40	50	50	Auto	1	FC10	433	6	191	370	1000	0.617571
Built	S40T50T50	Auto	40	50	50	Auto	1	MTeSPS	432	6	192	370	1000	0.615814
Built	S40T50T50	Auto	40	50	50	Auto	1	MTP	444	6	180	370	1000	0.637002
Built	S40T50T50	Auto	40	50	50	Auto	1	MTrSPS	390	5	234	371	1000	0.545662
Built	S40T50T50	Auto	40	50	50	Auto	1	10PTP	384	5	240	371	1000	0.53557
Built	S40T50T50	H_1	40	50	50	H	1	BTOPA	581	47	43	329	1000	0.807797
Built	S40T50T50	H_1	40	50	50	H	1	EETOD	518	18	106	358	1000	0.747491
Built	S40T50T50	H_1	40	50	50	H	1	ETeSS	397	10	227	366	1000	0.546901
Built	S40T50T50	H_1	40	50	50	H	1	ETrSS	396	10	228	366	1000	0.545204
Built	S40T50T50	H_1	40	50	50	H	1	FC1	622	171	2	205	1000	0.595166
Built	S40T50T50	H_1	40	50	50	H	1	FC5	580	46	44	330	1000	0.808001
Built	S40T50T50	H_1	40	50	50	H	1	FC10	514	18	110	358	1000	0.739871
Built	S40T50T50	H_1	40	50	50	H	1	MTeSPS	457	11	167	365	1000	0.649562
Built	S40T50T50	H_1	40	50	50	H	1	MTP	493	14	131	362	1000	0.70899
Built	S40T50T50	H_1	40	50	50	H	1	MTrSPS	421	10	203	366	1000	0.588097
Built	S40T50T50	H_1	40	50	50	H	1	10PTP	400	10	224	366	1000	0.551999
Built	S40T50T50	H_3	40	50	50	H	3	BTOPA	617	130	7	246	1000	0.687745
Built	S40T50T50	H_3	40	50	50	H	3	EETOD	617	145	7	231	1000	0.650594
Built	S40T50T50	H_3	40	50	50	H	3	ETeSS	415	10	209	366	1000	0.577709
Built	S40T50T50	H_3	40	50	50	H	3	ETrSS	419	10	205	366	1000	0.584628
Built	S40T50T50	H_3	40	50	50	H	3	FC1	624	307	0	69	1000	0.219052
Built	S40T50T50	H_3	40	50	50	H	3	FC5	624	207	0	169	1000	0.50468
Built	S40T50T50	H_3	40	50	50	H	3	FC10	617	132	7	244	1000	0.682828
Built	S40T50T50	H_3	40	50	50	H	3	MTeSPS	475	13	149	363	1000	0.677917
Built	S40T50T50	H_3	40	50	50	H	3	MTP	543	24	81	352	1000	0.782781
Built	S40T50T50	H_3	40	50	50	H	3	MTrSPS	465	11	159	365	1000	0.664
Built	S40T50T50	H_3	40	50	50	H	3	10PTP	433	10	191	366	1000	0.609053
Built	S40T50T50	H_5	40	50	50	H	5	BTOPA	623	200	1	176	1000	0.52131
Built	S40T50T50	H_5	40	50	50	H	5	EETOD	624	220	0	156	1000	0.469481
Built	S40T50T50	H_5	40	50	50	H	5	ETeSS	457	13	167	363	1000	0.645278
Built	S40T50T50	H_5	40	50	50	H	5	ETrSS	415	11	209	365	1000	0.575578
Built	S40T50T50	H_5	40	50	50	H	5	FC1	624	348	0	28	1000	0.0912509
Built	S40T50T50	H_5	40	50	50	H	5	FC5	624	286	0	90	1000	0.281984
Built	S40T50T50	H_5	40	50	50	H	5	FC10	624	218	0	158	1000	0.474932
Built	S40T50T50	H_5	40	50	50	H	5	MTeSPS	512	20	112	356	1000	0.731742
Built	S40T50T50	H_5	40	50	50	H	5	MTP	560	41	64	335	1000	0.778925
Built	S40T50T50	H_5	40	50	50	H	5	MTrSPS	445	12	179	364	1000	0.625977
Built	S40T50T50	H_5	40	50	50	H	5	10PTP	431	11	193	365	1000	0.603409
Built	S40T50T50	H_025	40	50	50	H	0.25	BTOPA	511	14	113	362	1000	0.742811
Built	S40T50T50	H_025	40	50	50	H	0.25	EETOD	384	5	240	371	1000	0.53557
Built	S40T50T50	H_025	40	50	50	H	0.25	ETeSS	376	5	248	371	1000	0.522202
Built	S40T50T50	H_025	40	50	50	H	0.25	ETrSS	328	4	296	372	1000	0.446151
Built	S40T50T50	H_025	40	50	50	H	0.25	FC1	560	23	64	353	1000	0.818529
Built	S40T50T50	H_025	40	50	50	H	0.25	FC5	467	10	157	366	1000	0.669767
Built	S40T50T50	H_025	40	50	50	H	0.25	FC10	407	7	217	369	1000	0.570328
Built	S40T50T50	H_025	40	50	50	H	0.25	MTeSPS	402	6	222	370	1000	0.5639
Built	S40T50T50	H_025	40	50	50	H	0.25	MTP	394	6	230	370	1000	0.550305
Built	S40T50T50	H_025	40	50	50	H	0.25	MTrSPS	345	5	279	371	1000	0.471333
Built	S40T50T50	H_025	40	50	50	H	0.25	10PTP	300	4	324	372	1000	0.402123
Built	S40T50T50	L_1	40	50	50	L	1	BTOPA	575	45	49	331	1000	0.800102
Built	S40T50T50	L_1	40	50	50	L	1	EETOD	529	21	95	355	1000	0.7621
Built	S40T50T50	L_1	40	50	50	L	1	ETeSS	412	10	212	366	1000	0.572538
Built	S40T50T50	L_1	40	50	50	L	1	ETrSS	420	10	204	366	1000	0.586362
Built	S40T50T50	L_1	40	50	50	L	1	FC1	613	110	11	266	1000	0.727904
Built	S40T50T50	L_1	40	50	50	L	1	FC5	577	45	47	331	1000	0.804149
Built	S40T50T50	L_1	40	50	50	L	1	FC10	525	20	99	356	1000	0.756567
Built	S40T50T50	L_1	40	50	50	L	1	MTeSPS	465	12	159	364	1000	0.661858
Built	S40T50T50	L_1	40	50	50	L	1	MTP	498	18	126	358	1000	0.709696
Built	S40T50T50	L_1	40	50	50	L	1	MTrSPS	465	12	159	364	1000	0.661858
Built	S40T50T50	L_1	40	50	50	L	1	10PTP	433	10	191	366	1000	0.609053
Built	S40T50T50	L_3	40	50	50	L	3	BTOPA	592	54	32	322	1000	0.814572
Built	S40T50T50	L_3	40	50	50	L	3	EETOD	571	34	53	342	1000	0.81644
Built	S40T50T50	L_3	40	50	50	L	3	ETeSS	399	10	225	366	1000	0.550298
Built	S40T50T50	L_3	40	50	50	L	3	ETrSS	414	10	210	366	1000	0.575984
Built	S40T50T50	L_3	40	50	50	L	3	FC1	617	125	7	251	1000	0.699989
Built	S40T50T50	L_3	40	50	50	L	3	FC5	595	63	29	313	1000	0.800354
Built	S40T50T50	L_3	40	50	50	L	3	FC10	549	25	75	351	1000	0.792379
Built	S40T50T50	L_3	40	50	50	L	3	MTeSPS	414	10	210	366	1000	0.575984
Built	S40T50T50	L_3	40	50	50	L	3	MTP	492	16	132	360	1000	0.702821
Built	S40T50T50	L_3	40	50	50	L	3	MTrSPS	492	16	132	360	1000	0.702821
Built	S40T50T50	L_3	40	50	50	L	3	10PTP	441	10	183	366	1000	0.623159
Built	S40T50T50	L_5	40	50	50	L	5	BTOPA	605	74	19	302	1000	0.795877
Built	S40T50T50	L_5	40	50	50	L	5	EETOD	602	67	22	309	1000	0.805714
Built	S40T50T50	L_5	40	50	50	L	5	ETeSS	397	10	227	366	1000	0.546901
Built	S40T50T50	L_5	40	50	50	L	5	ETrSS	419	10	205	366	1000	0.584628
Built	S40T50T50	L_5	40	50	50	L	5	FC1	622	160	2	216	1000	0.623312
Built	S40T50T50	L_5	40	50	50	L	5	FC5	609	88	15	288	1000	0.771692
Built	S40T50T50	L_5	40	50	50	L	5	FC10	589	45	35	331	1000	0.828609
Built	S40T50T50	L_5	40	50	50	L	5	MTeSPS	479	11	145	365	1000	0.68954
Built	S40T50T50	L_5	40	50	50	L	5	MTP	516	21	108	355	1000	0.737177
Built	S40T50T50	L_5	40	50	50	L	5	MTrSPS	494	13	130	363	1000	0.713004
Built	S40T50T50	L_5	40	50	50	L	5	10PTP	461	11	163	365	1000	0.656767
Built	S40T50T50	L_025	40	50	50	L	0.25	BTOPA	594	61	30	315	1000	0.802843
Built	S40T50T50	L_025	40	50	50	L	0.25	EETOD	534	22	90	354	1000	0.7696
Built	S40T50T50	L_025	40	50	50	L	0.25	ETeSS	411	10	213	366	1000	0.570817
Built	S40T50T50	L_025	40	50	50	L	0.25	ETrSS	409	10	215	366	1000	0.567381
Built	S40T50T50	L_025	40	50	50	L	0.25	FC1	620	137	4	239	1000	0.676801
Built	S40T50T50	L_025	40	50	50	L	0.25	FC5	601	71	23	305	1000	0.794465
Built	S40T50T50	L_025	40	50	50	L	0.25	FC10	562	34	62	342	1000	0.798401
Built	S40T50T50	L_025	40	50	50	L	0.25	MTeSPS	455	10	169	366	1000	0.648109
Built	S40T50T50	L_025	40	50	50	L	0.25	MTP	497	15	127	361	1000	0.7143
Built	S40T50T50	L_025	40	50	50	L	0.25	MTrSPS	464	10	160	366	1000	0.664329
Built	S40T50T50	L_025	40	50	50	L	0.25	10PTP	454	10	170	366	1000	0.646315
Built	S40T50T50	LQ_1	40	50	50	LQ	1	BTOPA	499	10	125	366	1000	0.728789
Built	S40T50T50	LQ_1	40	50	50	LQ	1	EETOD	427	6	197	370	1000	0.607058
Built	S40T50T50	LQ_1	40	50	50	LQ	1	ETeSS	369	5	255	371	1000	0.510586
Built	S40T50T50	LQ_1	40	50	50	LQ	1	ETrSS	351	5	273	371	1000	0.481064
Built	S40T50T50	LQ_1	40	50	50	LQ	1	FC1	519	10	105	366	1000	0.766643
Built	S40T50T50	LQ_1	40	50	50	LQ	1	FC5	445	6	179	370	1000	0.638779
Built	S40T50T50	LQ_1	40	50	50	LQ	1	FC10	396	5	228	371	1000	0.555811
Built	S40T50T50	LQ_1	40	50	50	LQ	1	MTeSPS	410	6	214	370	1000	0.577599
Built	S40T50T50	LQ_1	40	50	50	LQ	1	MTP	445	6	179	370	1000	0.638779
Built	S40T50T50	LQ_1	40	50	50	LQ	1	MTrSPS	412	6	212	370	1000	0.58104
Built	S40T50T50	LQ_1	40	50	50	LQ	1	10PTP	363	5	261	371	1000	0.500691
Built	S40T50T50	LQ_3	40	50	50	LQ	3	BTOPA	532	10	92	366	1000	0.79166
Built	S40T50T50	LQ_3	40	50	50	LQ	3	EETOD	472	9	152	367	1000	0.681006
Built	S40T50T50	LQ_3	40	50	50	LQ	3	ETeSS	360	6	264	370	1000	0.493654
Built	S40T50T50	LQ_3	40	50	50	LQ	3	ETrSS	330	5	294	371	1000	0.447238
Built	S40T50T50	LQ_3	40	50	50	LQ	3	FC1	555	14	69	362	1000	0.828117
Built	S40T50T50	LQ_3	40	50	50	LQ	3	FC5	473	9	151	367	1000	0.682832
Built	S40T50T50	LQ_3	40	50	50	LQ	3	FC10	433	7	191	369	1000	0.615444
Built	S40T50T50	LQ_3	40	50	50	LQ	3	MTeSPS	404	6	220	370	1000	0.567315
Built	S40T50T50	LQ_3	40	50	50	LQ	3	MTP	451	9	173	367	1000	0.643081
Built	S40T50T50	LQ_3	40	50	50	LQ	3	MTrSPS	383	6	241	370	1000	0.531778
Built	S40T50T50	LQ_3	40	50	50	LQ	3	10PTP	337	6	287	370	1000	0.456336
Built	S40T50T50	LQ_5	40	50	50	LQ	5	BTOPA	536	12	88	364	1000	0.795122
Built	S40T50T50	LQ_5	40	50	50	LQ	5	EETOD	485	10	139	366	1000	0.702737
Built	S40T50T50	LQ_5	40	50	50	LQ	5	ETeSS	369	5	255	371	1000	0.510586
Built	S40T50T50	LQ_5	40	50	50	LQ	5	ETrSS	334	5	290	371	1000	0.453631
Built	S40T50T50	LQ_5	40	50	50	LQ	5	FC1	559	15	65	361	1000	0.833904
Built	S40T50T50	LQ_5	40	50	50	LQ	5	FC5	482	10	142	366	1000	0.697202
Built	S40T50T50	LQ_5	40	50	50	LQ	5	FC10	441	7	183	369	1000	0.629555
Built	S40T50T50	LQ_5	40	50	50	LQ	5	MTeSPS	373	6	251	370	1000	0.515102
Built	S40T50T50	LQ_5	40	50	50	LQ	5	MTP	445	8	179	368	1000	0.63452
Built	S40T50T50	LQ_5	40	50	50	LQ	5	MTrSPS	364	5	260	371	1000	0.502336
Built	S40T50T50	LQ_5	40	50	50	LQ	5	10PTP	322	5	302	371	1000	0.434522
Built	S40T50T50	LQ_025	40	50	50	LQ	0.25	BTOPA	509	11	115	365	1000	0.745475
Built	S40T50T50	LQ_025	40	50	50	LQ	0.25	EETOD	422	6	202	370	1000	0.598344
Built	S40T50T50	LQ_025	40	50	50	LQ	0.25	ETeSS	359	5	265	371	1000	0.494124
Built	S40T50T50	LQ_025	40	50	50	LQ	0.25	ETrSS	358	5	266	371	1000	0.492487
Built	S40T50T50	LQ_025	40	50	50	LQ	0.25	FC1	536	12	88	364	1000	0.795122
Built	S40T50T50	LQ_025	40	50	50	LQ	0.25	FC5	460	9	164	367	1000	0.65924
Built	S40T50T50	LQ_025	40	50	50	LQ	0.25	FC10	414	6	210	370	1000	0.584488
Built	S40T50T50	LQ_025	40	50	50	LQ	0.25	MTeSPS	421	6	203	370	1000	0.596606
Built	S40T50T50	LQ_025	40	50	50	LQ	0.25	MTP	453	8	171	368	1000	0.648794
Built	S40T50T50	LQ_025	40	50	50	LQ	0.25	MTrSPS	416	6	208	370	1000	0.587942
Built	S40T50T50	LQ_025	40	50	50	LQ	0.25	10PTP	379	6	245	370	1000	0.525089
Built	S40T50T50	LQP_1	40	50	50	LQP	1	BTOPA	507	10	117	366	1000	0.74384
Built	S40T50T50	LQP_1	40	50	50	LQP	1	EETOD	443	6	181	370	1000	0.635227
Built	S40T50T50	LQP_1	40	50	50	LQP	1	ETeSS	378	6	246	370	1000	0.52342
Built	S40T50T50	LQP_1	40	50	50	LQP	1	ETrSS	290	3	334	373	1000	0.388757
Built	S40T50T50	LQP_1	40	50	50	LQP	1	FC1	525	10	99	366	1000	0.778149
Built	S40T50T50	LQP_1	40	50	50	LQP	1	FC5	451	8	173	368	1000	0.645215
Built	S40T50T50	LQP_1	40	50	50	LQP	1	FC10	402	6	222	370	1000	0.5639
Built	S40T50T50	LQP_1	40	50	50	LQP	1	MTeSPS	411	6	213	370	1000	0.579319
Built	S40T50T50	LQP_1	40	50	50	LQP	1	MTP	451	7	173	369	1000	0.647346
Built	S40T50T50	LQP_1	40	50	50	LQP	1	MTrSPS	326	4	298	372	1000	0.442969
Built	S40T50T50	LQP_1	40	50	50	LQP	1	10PTP	288	3	336	373	1000	0.385683
Built	S40T50T50	LQP_3	40	50	50	LQP	3	BTOPA	543	13	81	363	1000	0.806629
Built	S40T50T50	LQP_3	40	50	50	LQP	3	EETOD	498	10	126	366	1000	0.726916
Built	S40T50T50	LQP_3	40	50	50	LQP	3	ETeSS	341	5	283	371	1000	0.464875
Built	S40T50T50	LQP_3	40	50	50	LQP	3	ETrSS	325	4	299	372	1000	0.44138
Built	S40T50T50	LQP_3	40	50	50	LQP	3	FC1	559	15	65	361	1000	0.833904
Built	S40T50T50	LQP_3	40	50	50	LQP	3	FC5	494	10	130	366	1000	0.719443
Built	S40T50T50	LQP_3	40	50	50	LQP	3	FC10	444	8	180	368	1000	0.632744
Built	S40T50T50	LQP_3	40	50	50	LQP	3	MTeSPS	401	6	223	370	1000	0.562195
Built	S40T50T50	LQP_3	40	50	50	LQP	3	MTP	427	7	197	369	1000	0.604933
Built	S40T50T50	LQP_3	40	50	50	LQP	3	MTrSPS	379	6	245	370	1000	0.525089
Built	S40T50T50	LQP_3	40	50	50	LQP	3	10PTP	322	4	302	372	1000	0.436622
Built	S40T50T50	LQP_5	40	50	50	LQP	5	BTOPA	588	28	36	348	1000	0.864186
Built	S40T50T50	LQP_5	40	50	50	LQP	5	EETOD	567	18	57	358	1000	0.843398
Built	S40T50T50	LQP_5	40	50	50	LQP	5	ETeSS	329	4	295	372	1000	0.447744
Built	S40T50T50	LQP_5	40	50	50	LQP	5	ETrSS	351	4	273	372	1000	0.48317
Built	S40T50T50	LQP_5	40	50	50	LQP	5	FC1	604	42	20	334	1000	0.866319
Built	S40T50T50	LQP_5	40	50	50	LQP	5	FC5	556	15	68	361	1000	0.827941
Built	S40T50T50	LQP_5	40	50	50	LQP	5	FC10	518	10	106	366	1000	0.764733
Built	S40T50T50	LQP_5	40	50	50	LQP	5	MTeSPS	387	5	237	371	1000	0.540609
Built	S40T50T50	LQP_5	40	50	50	LQP	5	MTP	451	8	173	368	1000	0.645215
Built	S40T50T50	LQP_5	40	50	50	LQP	5	MTrSPS	419	6	205	370	1000	0.593135
Built	S40T50T50	LQP_5	40	50	50	LQP	5	10PTP	371	5	253	371	1000	0.513897
Built	S40T50T50	LQP_025	40	50	50	LQP	0.25	BTOPA	517	11	107	365	1000	0.760676
Built	S40T50T50	LQP_025	40	50	50	LQP	0.25	EETOD	443	9	181	367	1000	0.628837
Built	S40T50T50	LQP_025	40	50	50	LQP	0.25	ETeSS	354	6	270	370	1000	0.483842
Built	S40T50T50	LQP_025	40	50	50	LQP	0.25	ETrSS	372	6	252	370	1000	0.513443
Built	S40T50T50	LQP_025	40	50	50	LQP	0.25	FC1	548	12	76	364	1000	0.818602
Built	S40T50T50	LQP_025	40	50	50	LQP	0.25	FC5	472	10	152	366	1000	0.678867
Built	S40T50T50	LQP_025	40	50	50	LQP	0.25	FC10	424	6	200	370	1000	0.601825
Built	S40T50T50	LQP_025	40	50	50	LQP	0.25	MTeSPS	431	7	193	369	1000	0.611934
Built	S40T50T50	LQP_025	40	50	50	LQP	0.25	MTP	441	7	183	369	1000	0.629555
Built	S40T50T50	LQP_025	40	50	50	LQP	0.25	MTrSPS	441	7	183	369	1000	0.629555
Built	S40T50T50	LQP_025	40	50	50	LQP	0.25	10PTP	394	6	230	370	1000	0.550305
Built	S40T50T50	LQPT_1	40	50	50	LQPT	1	BTOPA	526	11	98	365	1000	0.777924
Built	S40T50T50	LQPT_1	40	50	50	LQPT	1	EETOD	458	6	166	370	1000	0.662035
Built	S40T50T50	LQPT_1	40	50	50	LQPT	1	ETeSS	357	5	267	371	1000	0.49085
Built	S40T50T50	LQPT_1	40	50	50	LQPT	1	ETrSS	340	5	284	371	1000	0.463264
Built	S40T50T50	LQPT_1	40	50	50	LQPT	1	FC1	553	15	71	361	1000	0.821996
Built	S40T50T50	LQPT_1	40	50	50	LQPT	1	FC5	478	9	146	367	1000	0.691986
Built	S40T50T50	LQPT_1	40	50	50	LQPT	1	FC10	436	6	188	370	1000	0.62285
Built	S40T50T50	LQPT_1	40	50	50	LQPT	1	MTeSPS	416	6	208	370	1000	0.587942
Built	S40T50T50	LQPT_1	40	50	50	LQPT	1	MTP	423	6	201	370	1000	0.600083
Built	S40T50T50	LQPT_1	40	50	50	LQPT	1	MTrSPS	392	5	232	371	1000	0.549039
Built	S40T50T50	LQPT_1	40	50	50	LQPT	1	10PTP	351	5	273	371	1000	0.481064
Built	S40T50T50	LQPT_3	40	50	50	LQPT	3	BTOPA	564	17	60	359	1000	0.839554
Built	S40T50T50	LQPT_3	40	50	50	LQPT	3	EETOD	527	11	97	365	1000	0.779851
Built	S40T50T50	LQPT_3	40	50	50	LQPT	3	ETeSS	336	4	288	372	1000	0.458939
Built	S40T50T50	LQPT_3	40	50	50	LQPT	3	ETrSS	336	4	288	372	1000	0.458939
Built	S40T50T50	LQPT_3	40	50	50	LQPT	3	FC1	587	26	37	350	1000	0.866519
Built	S40T50T50	LQPT_3	40	50	50	LQPT	3	FC5	525	11	99	365	1000	0.776
Built	S40T50T50	LQPT_3	40	50	50	LQPT	3	FC10	475	9	149	367	1000	0.686488
Built	S40T50T50	LQPT_3	40	50	50	LQPT	3	MTeSPS	425	7	199	369	1000	0.601443
Built	S40T50T50	LQPT_3	40	50	50	LQPT	3	MTP	447	8	177	368	1000	0.638078
Built	S40T50T50	LQPT_3	40	50	50	LQPT	3	MTrSPS	372	6	252	370	1000	0.513443
Built	S40T50T50	LQPT_3	40	50	50	LQPT	3	10PTP	339	4	285	372	1000	0.463758
Built	S40T50T50	LQPT_5	40	50	50	LQPT	5	BTOPA	555	14	69	362	1000	0.828117
Built	S40T50T50	LQPT_5	40	50	50	LQPT	5	EETOD	512	10	112	366	1000	0.753308
Built	S40T50T50	LQPT_5	40	50	50	LQPT	5	ETeSS	359	6	265	370	1000	0.492015
Built	S40T50T50	LQPT_5	40	50	50	LQPT	5	ETrSS	299	3	325	373	1000	0.402663
Built	S40T50T50	LQPT_5	40	50	50	LQPT	5	FC1	572	18	52	358	1000	0.853458
Built	S40T50T50	LQPT_5	40	50	50	LQPT	5	FC5	501	10	123	366	1000	0.732541
Built	S40T50T50	LQPT_5	40	50	50	LQPT	5	FC10	455	9	169	367	1000	0.650245
Built	S40T50T50	LQPT_5	40	50	50	LQPT	5	MTeSPS	402	6	222	370	1000	0.5639
Built	S40T50T50	LQPT_5	40	50	50	LQPT	5	MTP	414	6	210	370	1000	0.584488
Built	S40T50T50	LQPT_5	40	50	50	LQPT	5	MTrSPS	365	6	259	370	1000	0.501872
Built	S40T50T50	LQPT_5	40	50	50	LQPT	5	10PTP	308	4	316	372	1000	0.414588
Built	S40T50T50	LQPT_025	40	50	50	LQPT	0.25	BTOPA	481	14	143	362	1000	0.686777
Built	S40T50T50	LQPT_025	40	50	50	LQPT	0.25	EETOD	289	2	335	374	1000	0.389307
Built	S40T50T50	LQPT_025	40	50	50	LQPT	0.25	ETeSS	490	14	134	362	1000	0.703412
Built	S40T50T50	LQPT_025	40	50	50	LQPT	0.25	ETrSS	125	1	499	375	1000	0.156477
Built	S40T50T50	LQPT_025	40	50	50	LQPT	0.25	FC1	561	23	63	353	1000	0.820522
Built	S40T50T50	LQPT_025	40	50	50	LQPT	0.25	FC5	436	11	188	365	1000	0.612195
Built	S40T50T50	LQPT_025	40	50	50	LQPT	0.25	FC10	362	7	262	369	1000	0.494824
Built	S40T50T50	LQPT_025	40	50	50	LQPT	0.25	MTeSPS	553	22	71	354	1000	0.806813
Built	S40T50T50	LQPT_025	40	50	50	LQPT	0.25	MTP	125	1	499	375	1000	0.156477
Built	S40T50T50	LQPT_025	40	50	50	LQPT	0.25	MTrSPS	125	1	499	375	1000	0.156477
Built	S40T50T50	LQPT_025	40	50	50	LQPT	0.25	10PTP	87	1	537	375	1000	0.106573
Built	S40T50T50	LQPTH_1	40	50	50	LQPTH	1	BTOPA	503	10	121	366	1000	0.7363
Built	S40T50T50	LQPTH_1	40	50	50	LQPTH	1	EETOD	427	5	197	371	1000	0.609182
Built	S40T50T50	LQPTH_1	40	50	50	LQPTH	1	ETeSS	396	5	228	371	1000	0.555811
Built	S40T50T50	LQPTH_1	40	50	50	LQPTH	1	ETrSS	316	4	308	372	1000	0.427145
Built	S40T50T50	LQPTH_1	40	50	50	LQPTH	1	FC1	528	12	96	364	1000	0.779628
Built	S40T50T50	LQPTH_1	40	50	50	LQPTH	1	FC5	454	6	170	370	1000	0.654848
Built	S40T50T50	LQPTH_1	40	50	50	LQPTH	1	FC10	409	5	215	371	1000	0.578001
Built	S40T50T50	LQPTH_1	40	50	50	LQPTH	1	MTeSPS	444	6	180	370	1000	0.637002
Built	S40T50T50	LQPTH_1	40	50	50	LQPTH	1	MTP	414	5	210	371	1000	0.586608
Built	S40T50T50	LQPTH_1	40	50	50	LQPTH	1	MTrSPS	376	5	248	371	1000	0.522202
Built	S40T50T50	LQPTH_1	40	50	50	LQPTH	1	10PTP	315	4	309	372	1000	0.42557
Built	S40T50T50	LQPTH_3	40	50	50	LQPTH	3	BTOPA	551	15	73	361	1000	0.818043
Built	S40T50T50	LQPTH_3	40	50	50	LQPTH	3	EETOD	503	10	121	366	1000	0.7363
Built	S40T50T50	LQPTH_3	40	50	50	LQPTH	3	ETeSS	353	5	271	371	1000	0.48432
Built	S40T50T50	LQPTH_3	40	50	50	LQPTH	3	ETrSS	332	5	292	371	1000	0.450432
Built	S40T50T50	LQPTH_3	40	50	50	LQPTH	3	FC1	572	19	52	357	1000	0.851288
Built	S40T50T50	LQPTH_3	40	50	50	LQPTH	3	FC5	508	10	116	366	1000	0.74573
Built	S40T50T50	LQPTH_3	40	50	50	LQPTH	3	FC10	457	8	167	368	1000	0.655972
Built	S40T50T50	LQPTH_3	40	50	50	LQPTH	3	MTeSPS	374	5	250	371	1000	0.518875
Built	S40T50T50	LQPTH_3	40	50	50	LQPTH	3	MTP	434	6	190	370	1000	0.619329
Built	S40T50T50	LQPTH_3	40	50	50	LQPTH	3	MTrSPS	419	6	205	370	1000	0.593135
Built	S40T50T50	LQPTH_3	40	50	50	LQPTH	3	10PTP	337	5	287	371	1000	0.458441
Built	S40T50T50	LQPTH_5	40	50	50	LQPTH	5	BTOPA	575	19	49	357	1000	0.857349
Built	S40T50T50	LQPTH_5	40	50	50	LQPTH	5	EETOD	549	14	75	362	1000	0.816258
Built	S40T50T50	LQPTH_5	40	50	50	LQPTH	5	ETeSS	343	5	281	371	1000	0.468101
Built	S40T50T50	LQPTH_5	40	50	50	LQPTH	5	ETrSS	338	5	286	371	1000	0.460047
Built	S40T50T50	LQPTH_5	40	50	50	LQPTH	5	FC1	595	27	29	349	1000	0.880786
Built	S40T50T50	LQPTH_5	40	50	50	LQPTH	5	FC5	536	12	88	364	1000	0.795122
Built	S40T50T50	LQPTH_5	40	50	50	LQPTH	5	FC10	494	10	130	366	1000	0.719443
Built	S40T50T50	LQPTH_5	40	50	50	LQPTH	5	MTeSPS	380	6	244	370	1000	0.526759
Built	S40T50T50	LQPTH_5	40	50	50	LQPTH	5	MTP	438	8	186	368	1000	0.622121
Built	S40T50T50	LQPTH_5	40	50	50	LQPTH	5	MTrSPS	423	7	201	369	1000	0.597959
Built	S40T50T50	LQPTH_5	40	50	50	LQPTH	5	10PTP	343	5	281	371	1000	0.468101
Built	S40T50T50	LQPTH_025	40	50	50	LQPTH	0.25	BTOPA	467	13	157	363	1000	0.66334
Built	S40T50T50	LQPTH_025	40	50	50	LQPTH	0.25	EETOD	280	2	344	374	1000	0.375523
Built	S40T50T50	LQPTH_025	40	50	50	LQPTH	0.25	ETeSS	467	13	157	363	1000	0.66334
Built	S40T50T50	LQPTH_025	40	50	50	LQPTH	0.25	ETrSS	176	1	448	375	1000	0.226001
Built	S40T50T50	LQPTH_025	40	50	50	LQPTH	0.25	FC1	538	17	86	359	1000	0.788223
Built	S40T50T50	LQPTH_025	40	50	50	LQPTH	0.25	FC5	413	10	211	366	1000	0.57426
Built	S40T50T50	LQPTH_025	40	50	50	LQPTH	0.25	FC10	334	5	290	371	1000	0.453631
Built	S40T50T50	LQPTH_025	40	50	50	LQPTH	0.25	MTeSPS	535	17	89	359	1000	0.782387
Built	S40T50T50	LQPTH_025	40	50	50	LQPTH	0.25	MTP	195	1	429	375	1000	0.252683
Built	S40T50T50	LQPTH_025	40	50	50	LQPTH	0.25	MTrSPS	195	1	429	375	1000	0.252683
Built	S40T50T50	LQPTH_025	40	50	50	LQPTH	0.25	10PTP	115	1	509	375	1000	0.143191
Built	S40T50T50	PT_1	40	50	50	PT	1	BTOPA	538	15	86	361	1000	0.792546
Built	S40T50T50	PT_1	40	50	50	PT	1	EETOD	472	9	152	367	1000	0.681006
Built	S40T50T50	PT_1	40	50	50	PT	1	ETeSS	387	7	237	369	1000	0.536376
Built	S40T50T50	PT_1	40	50	50	PT	1	ETrSS	340	4	284	372	1000	0.465368
Built	S40T50T50	PT_1	40	50	50	PT	1	FC1	573	28	51	348	1000	0.833667
Built	S40T50T50	PT_1	40	50	50	PT	1	FC5	497	12	127	364	1000	0.720753
Built	S40T50T50	PT_1	40	50	50	PT	1	FC10	454	9	170	367	1000	0.648452
Built	S40T50T50	PT_1	40	50	50	PT	1	MTeSPS	412	8	212	368	1000	0.576793
Built	S40T50T50	PT_1	40	50	50	PT	1	MTP	445	9	179	367	1000	0.632387
Built	S40T50T50	PT_1	40	50	50	PT	1	MTrSPS	394	7	230	369	1000	0.548186
Built	S40T50T50	PT_1	40	50	50	PT	1	10PTP	332	4	292	372	1000	0.452533
Built	S40T50T50	PT_3	40	50	50	PT	3	BTOPA	591	32	33	344	1000	0.861554
Built	S40T50T50	PT_3	40	50	50	PT	3	EETOD	564	20	60	356	1000	0.833044
Built	S40T50T50	PT_3	40	50	50	PT	3	ETeSS	365	5	259	371	1000	0.503983
Built	S40T50T50	PT_3	40	50	50	PT	3	ETrSS	380	6	244	370	1000	0.526759
Built	S40T50T50	PT_3	40	50	50	PT	3	FC1	606	58	18	318	1000	0.834541
Built	S40T50T50	PT_3	40	50	50	PT	3	FC5	556	18	68	358	1000	0.821446
Built	S40T50T50	PT_3	40	50	50	PT	3	FC10	519	12	105	364	1000	0.762346
Built	S40T50T50	PT_3	40	50	50	PT	3	MTeSPS	414	6	210	370	1000	0.584488
Built	S40T50T50	PT_3	40	50	50	PT	3	MTP	498	12	126	364	1000	0.722624
Built	S40T50T50	PT_3	40	50	50	PT	3	MTrSPS	442	7	182	369	1000	0.631326
Built	S40T50T50	PT_3	40	50	50	PT	3	10PTP	393	6	231	370	1000	0.548613
Built	S40T50T50	PT_5	40	50	50	PT	5	BTOPA	602	51	22	325	1000	0.84201
Built	S40T50T50	PT_5	40	50	50	PT	5	EETOD	587	36	37	340	1000	0.844514
Built	S40T50T50	PT_5	40	50	50	PT	5	ETeSS	389	8	235	368	1000	0.537622
Built	S40T50T50	PT_5	40	50	50	PT	5	ETrSS	377	6	247	370	1000	0.521754
Built	S40T50T50	PT_5	40	50	50	PT	5	FC1	614	80	10	296	1000	0.800836
Built	S40T50T50	PT_5	40	50	50	PT	5	FC5	578	30	46	346	1000	0.839397
Built	S40T50T50	PT_5	40	50	50	PT	5	FC10	534	14	90	362	1000	0.786927
Built	S40T50T50	PT_5	40	50	50	PT	5	MTeSPS	420	9	204	367	1000	0.588492
Built	S40T50T50	PT_5	40	50	50	PT	5	MTP	478	10	146	366	1000	0.689846
Built	S40T50T50	PT_5	40	50	50	PT	5	MTrSPS	422	9	202	367	1000	0.591965
Built	S40T50T50	PT_5	40	50	50	PT	5	10PTP	389	8	235	368	1000	0.537622
Built	S40T50T50	PT_025	40	50	50	PT	0.25	BTOPA	484	17	140	359	1000	0.685844
Built	S40T50T50	PT_025	40	50	50	PT	0.25	EETOD	303	5	321	371	1000	0.404692
Built	S40T50T50	PT_025	40	50	50	PT	0.25	ETeSS	482	17	142	359	1000	0.682158
Built	S40T50T50	PT_025	40	50	50	PT	0.25	ETrSS	210	2	414	374	1000	0.271994
Built	S40T50T50	PT_025	40	50	50	PT	0.25	FC1	579	43	45	333	1000	0.812664
Built	S40T50T50	PT_025	40	50	50	PT	0.25	FC5	460	16	164	360	1000	0.644235
Built	S40T50T50	PT_025	40	50	50	PT	0.25	FC10	368	10	256	366	1000	0.498356
Built	S40T50T50	PT_025	40	50	50	PT	0.25	MTeSPS	481	17	143	359	1000	0.680317
Built	S40T50T50	PT_025	40	50	50	PT	0.25	MTP	217	2	407	374	1000	0.282063
Built	S40T50T50	PT_025	40	50	50	PT	0.25	MTrSPS	217	2	407	374	1000	0.282063
Built	S40T50T50	PT_025	40	50	50	PT	0.25	10PTP	131	1	493	375	1000	0.164502
Built	S40T50T50	Q_1	40	50	50	Q	1	BTOPA	474	9	150	367	1000	0.684659
Built	S40T50T50	Q_1	40	50	50	Q	1	EETOD	423	6	201	370	1000	0.600083
Built	S40T50T50	Q_1	40	50	50	Q	1	ETeSS	373	6	251	370	1000	0.515102
Built	S40T50T50	Q_1	40	50	50	Q	1	ETrSS	320	5	304	371	1000	0.431358
Built	S40T50T50	Q_1	40	50	50	Q	1	FC1	483	9	141	367	1000	0.701186
Built	S40T50T50	Q_1	40	50	50	Q	1	FC5	422	6	202	370	1000	0.598344
Built	S40T50T50	Q_1	40	50	50	Q	1	FC10	375	6	249	370	1000	0.518425
Built	S40T50T50	Q_1	40	50	50	Q	1	MTeSPS	427	6	197	370	1000	0.607058
Built	S40T50T50	Q_1	40	50	50	Q	1	MTP	430	6	194	370	1000	0.612307
Built	S40T50T50	Q_1	40	50	50	Q	1	MTrSPS	353	5	271	371	1000	0.48432
Built	S40T50T50	Q_1	40	50	50	Q	1	10PTP	320	5	304	371	1000	0.431358
Built	S40T50T50	Q_3	40	50	50	Q	3	BTOPA	497	10	127	366	1000	0.725045
Built	S40T50T50	Q_3	40	50	50	Q	3	EETOD	446	9	178	367	1000	0.634165
Built	S40T50T50	Q_3	40	50	50	Q	3	ETeSS	346	6	278	370	1000	0.470844
Built	S40T50T50	Q_3	40	50	50	Q	3	ETrSS	308	3	316	373	1000	0.416683
Built	S40T50T50	Q_3	40	50	50	Q	3	FC1	515	10	109	366	1000	0.759012
Built	S40T50T50	Q_3	40	50	50	Q	3	FC5	444	8	180	368	1000	0.632744
Built	S40T50T50	Q_3	40	50	50	Q	3	FC10	409	6	215	370	1000	0.575881
Built	S40T50T50	Q_3	40	50	50	Q	3	MTeSPS	375	6	249	370	1000	0.518425
Built	S40T50T50	Q_3	40	50	50	Q	3	MTP	423	7	201	369	1000	0.597959
Built	S40T50T50	Q_3	40	50	50	Q	3	MTrSPS	364	6	260	370	1000	0.500225
Built	S40T50T50	Q_3	40	50	50	Q	3	10PTP	320	5	304	371	1000	0.431358
Built	S40T50T50	Q_5	40	50	50	Q	5	BTOPA	552	15	72	361	1000	0.820019
Built	S40T50T50	Q_5	40	50	50	Q	5	EETOD	515	10	109	366	1000	0.759012
Built	S40T50T50	Q_5	40	50	50	Q	5	ETeSS	325	4	299	372	1000	0.44138
Built	S40T50T50	Q_5	40	50	50	Q	5	ETrSS	346	4	278	372	1000	0.475056
Built	S40T50T50	Q_5	40	50	50	Q	5	FC1	569	20	55	356	1000	0.843073
Built	S40T50T50	Q_5	40	50	50	Q	5	FC5	506	10	118	366	1000	0.741952
Built	S40T50T50	Q_5	40	50	50	Q	5	FC10	455	8	169	368	1000	0.65238
Built	S40T50T50	Q_5	40	50	50	Q	5	MTeSPS	398	6	226	370	1000	0.55709
Built	S40T50T50	Q_5	40	50	50	Q	5	MTP	448	8	176	368	1000	0.63986
Built	S40T50T50	Q_5	40	50	50	Q	5	MTrSPS	412	6	212	370	1000	0.58104
Built	S40T50T50	Q_5	40	50	50	Q	5	10PTP	358	4	266	372	1000	0.494594
Built	S40T50T50	Q_025	40	50	50	Q	0.25	BTOPA	488	10	136	366	1000	0.708289
Built	S40T50T50	Q_025	40	50	50	Q	0.25	EETOD	437	6	187	370	1000	0.624613
Built	S40T50T50	Q_025	40	50	50	Q	0.25	ETeSS	372	6	252	370	1000	0.513443
Built	S40T50T50	Q_025	40	50	50	Q	0.25	ETrSS	343	5	281	371	1000	0.468101
Built	S40T50T50	Q_025	40	50	50	Q	0.25	FC1	513	10	111	366	1000	0.755207
Built	S40T50T50	Q_025	40	50	50	Q	0.25	FC5	447	8	177	368	1000	0.638078
Built	S40T50T50	Q_025	40	50	50	Q	0.25	FC10	405	6	219	370	1000	0.569025
Built	S40T50T50	Q_025	40	50	50	Q	0.25	MTeSPS	444	6	180	370	1000	0.637002
Built	S40T50T50	Q_025	40	50	50	Q	0.25	MTP	454	8	170	368	1000	0.650586
Built	S40T50T50	Q_025	40	50	50	Q	0.25	MTrSPS	400	6	224	370	1000	0.560492
Built	S40T50T50	Q_025	40	50	50	Q	0.25	10PTP	348	5	276	371	1000	0.476192
Built	S40T50T50	QH_1	40	50	50	QH	1	BTOPA	471	8	153	368	1000	0.681319
Built	S40T50T50	QH_1	40	50	50	QH	1	EETOD	398	6	226	370	1000	0.55709
Built	S40T50T50	QH_1	40	50	50	QH	1	ETeSS	349	5	275	371	1000	0.477815
Built	S40T50T50	QH_1	40	50	50	QH	1	ETrSS	329	5	295	371	1000	0.445643
Built	S40T50T50	QH_1	40	50	50	QH	1	FC1	484	9	140	367	1000	0.703031
Built	S40T50T50	QH_1	40	50	50	QH	1	FC5	423	6	201	370	1000	0.600083
Built	S40T50T50	QH_1	40	50	50	QH	1	FC10	384	5	240	371	1000	0.53557
Built	S40T50T50	QH_1	40	50	50	QH	1	MTeSPS	363	5	261	371	1000	0.500691
Built	S40T50T50	QH_1	40	50	50	QH	1	MTP	423	6	201	370	1000	0.600083
Built	S40T50T50	QH_1	40	50	50	QH	1	MTrSPS	389	6	235	370	1000	0.54186
Built	S40T50T50	QH_1	40	50	50	QH	1	10PTP	325	5	299	371	1000	0.43928
Built	S40T50T50	QH_3	40	50	50	QH	3	BTOPA	532	11	92	365	1000	0.789511
Built	S40T50T50	QH_3	40	50	50	QH	3	EETOD	480	10	144	366	1000	0.69352
Built	S40T50T50	QH_3	40	50	50	QH	3	ETeSS	325	5	299	371	1000	0.43928
Built	S40T50T50	QH_3	40	50	50	QH	3	ETrSS	355	5	269	371	1000	0.487582
Built	S40T50T50	QH_3	40	50	50	QH	3	FC1	552	13	72	363	1000	0.824337
Built	S40T50T50	QH_3	40	50	50	QH	3	FC5	484	10	140	366	1000	0.70089
Built	S40T50T50	QH_3	40	50	50	QH	3	FC10	449	6	175	370	1000	0.645903
Built	S40T50T50	QH_3	40	50	50	QH	3	MTeSPS	377	5	247	371	1000	0.523867
Built	S40T50T50	QH_3	40	50	50	QH	3	MTP	454	6	170	370	1000	0.654848
Built	S40T50T50	QH_3	40	50	50	QH	3	MTrSPS	411	6	213	370	1000	0.579319
Built	S40T50T50	QH_3	40	50	50	QH	3	10PTP	358	5	266	371	1000	0.492487
Built	S40T50T50	QH_5	40	50	50	QH	5	BTOPA	531	14	93	362	1000	0.781114
Built	S40T50T50	QH_5	40	50	50	QH	5	EETOD	491	9	133	367	1000	0.716
Built	S40T50T50	QH_5	40	50	50	QH	5	ETeSS	368	5	256	371	1000	0.508933
Built	S40T50T50	QH_5	40	50	50	QH	5	ETrSS	323	4	301	372	1000	0.438206
Built	S40T50T50	QH_5	40	50	50	QH	5	FC1	556	15	68	361	1000	0.827941
Built	S40T50T50	QH_5	40	50	50	QH	5	FC5	484	9	140	367	1000	0.703031
Built	S40T50T50	QH_5	40	50	50	QH	5	FC10	433	7	191	369	1000	0.615444
Built	S40T50T50	QH_5	40	50	50	QH	5	MTeSPS	423	6	201	370	1000	0.600083
Built	S40T50T50	QH_5	40	50	50	QH	5	MTP	431	6	193	370	1000	0.61406
Built	S40T50T50	QH_5	40	50	50	QH	5	MTrSPS	391	5	233	371	1000	0.54735
Built	S40T50T50	QH_5	40	50	50	QH	5	10PTP	323	4	301	372	1000	0.438206
Built	S40T50T50	QH_025	40	50	50	QH	0.25	BTOPA	509	11	115	365	1000	0.745475
Built	S40T50T50	QH_025	40	50	50	QH	0.25	EETOD	390	5	234	371	1000	0.545662
Built	S40T50T50	QH_025	40	50	50	QH	0.25	ETeSS	368	5	256	371	1000	0.508933
Built	S40T50T50	QH_025	40	50	50	QH	0.25	ETrSS	327	5	297	371	1000	0.442459
Built	S40T50T50	QH_025	40	50	50	QH	0.25	FC1	532	14	92	362	1000	0.78305
Built	S40T50T50	QH_025	40	50	50	QH	0.25	FC5	455	7	169	369	1000	0.654512
Built	S40T50T50	QH_025	40	50	50	QH	0.25	FC10	405	5	219	371	1000	0.571144
Built	S40T50T50	QH_025	40	50	50	QH	0.25	MTeSPS	388	5	236	371	1000	0.542292
Built	S40T50T50	QH_025	40	50	50	QH	0.25	MTP	404	5	220	371	1000	0.569434
Built	S40T50T50	QH_025	40	50	50	QH	0.25	MTrSPS	357	5	267	371	1000	0.49085
Built	S40T50T50	QH_025	40	50	50	QH	0.25	10PTP	307	4	317	372	1000	0.413025
Built	S40T50T50	QP_1	40	50	50	QP	1	BTOPA	524	10	100	366	1000	0.776226
Built	S40T50T50	QP_1	40	50	50	QP	1	EETOD	470	9	154	367	1000	0.677361
Built	S40T50T50	QP_1	40	50	50	QP	1	ETeSS	361	5	263	371	1000	0.497405
Built	S40T50T50	QP_1	40	50	50	QP	1	ETrSS	343	5	281	371	1000	0.468101
Built	S40T50T50	QP_1	40	50	50	QP	1	FC1	545	14	79	362	1000	0.808393
Built	S40T50T50	QP_1	40	50	50	QP	1	FC5	464	9	160	367	1000	0.666467
Built	S40T50T50	QP_1	40	50	50	QP	1	FC10	420	6	204	370	1000	0.59487
Built	S40T50T50	QP_1	40	50	50	QP	1	MTeSPS	408	6	216	370	1000	0.574164
Built	S40T50T50	QP_1	40	50	50	QP	1	MTP	458	8	166	368	1000	0.657771
Built	S40T50T50	QP_1	40	50	50	QP	1	MTrSPS	392	6	232	370	1000	0.546922
Built	S40T50T50	QP_1	40	50	50	QP	1	10PTP	353	5	271	371	1000	0.48432
Built	S40T50T50	QP_3	40	50	50	QP	3	BTOPA	552	17	72	359	1000	0.815692
Built	S40T50T50	QP_3	40	50	50	QP	3	EETOD	508	10	116	366	1000	0.74573
Built	S40T50T50	QP_3	40	50	50	QP	3	ETeSS	359	4	265	372	1000	0.496232
Built	S40T50T50	QP_3	40	50	50	QP	3	ETrSS	339	4	285	372	1000	0.463758
Built	S40T50T50	QP_3	40	50	50	QP	3	FC1	573	23	51	353	1000	0.8446
Built	S40T50T50	QP_3	40	50	50	QP	3	FC5	508	10	116	366	1000	0.74573
Built	S40T50T50	QP_3	40	50	50	QP	3	FC10	462	8	162	368	1000	0.664985
Built	S40T50T50	QP_3	40	50	50	QP	3	MTeSPS	429	7	195	369	1000	0.60843
Built	S40T50T50	QP_3	40	50	50	QP	3	MTP	417	5	207	371	1000	0.591793
Built	S40T50T50	QP_3	40	50	50	QP	3	MTrSPS	417	5	207	371	1000	0.591793
Built	S40T50T50	QP_3	40	50	50	QP	3	10PTP	343	4	281	372	1000	0.470205
Built	S40T50T50	QP_5	40	50	50	QP	5	BTOPA	584	27	40	349	1000	0.858193
Built	S40T50T50	QP_5	40	50	50	QP	5	EETOD	557	18	67	358	1000	0.823432
Built	S40T50T50	QP_5	40	50	50	QP	5	ETeSS	340	4	284	372	1000	0.465368
Built	S40T50T50	QP_5	40	50	50	QP	5	ETrSS	321	4	303	372	1000	0.435039
Built	S40T50T50	QP_5	40	50	50	QP	5	FC1	603	38	21	338	1000	0.873127
Built	S40T50T50	QP_5	40	50	50	QP	5	FC5	551	15	73	361	1000	0.818043
Built	S40T50T50	QP_5	40	50	50	QP	5	FC10	508	10	116	366	1000	0.74573
Built	S40T50T50	QP_5	40	50	50	QP	5	MTeSPS	390	5	234	371	1000	0.545662
Built	S40T50T50	QP_5	40	50	50	QP	5	MTP	447	8	177	368	1000	0.638078
Built	S40T50T50	QP_5	40	50	50	QP	5	MTrSPS	375	5	249	371	1000	0.520538
Built	S40T50T50	QP_5	40	50	50	QP	5	10PTP	324	4	300	372	1000	0.439792
Built	S40T50T50	QP_025	40	50	50	QP	0.25	BTOPA	501	10	123	366	1000	0.732541
Built	S40T50T50	QP_025	40	50	50	QP	0.25	EETOD	429	6	195	370	1000	0.610556
Built	S40T50T50	QP_025	40	50	50	QP	0.25	ETeSS	403	6	221	370	1000	0.565607
Built	S40T50T50	QP_025	40	50	50	QP	0.25	ETrSS	330	5	294	371	1000	0.447238
Built	S40T50T50	QP_025	40	50	50	QP	0.25	FC1	531	12	93	364	1000	0.785424
Built	S40T50T50	QP_025	40	50	50	QP	0.25	FC5	455	6	169	370	1000	0.656642
Built	S40T50T50	QP_025	40	50	50	QP	0.25	FC10	396	6	228	370	1000	0.553694
Built	S40T50T50	QP_025	40	50	50	QP	0.25	MTeSPS	455	6	169	370	1000	0.656642
Built	S40T50T50	QP_025	40	50	50	QP	0.25	MTP	440	6	184	370	1000	0.629912
Built	S40T50T50	QP_025	40	50	50	QP	0.25	MTrSPS	377	6	247	370	1000	0.521754
Built	S40T50T50	QP_025	40	50	50	QP	0.25	10PTP	333	5	291	371	1000	0.45203
Built	S40T50T50	T_1	40	50	50	T	1	BTOPA	577	88	47	288	1000	0.705934
Built	S40T50T50	T_1	40	50	50	T	1	EETOD	571	57	53	319	1000	0.765086
Built	S40T50T50	T_1	40	50	50	T	1	ETeSS	502	22	122	354	1000	0.70853
Built	S40T50T50	T_1	40	50	50	T	1	ETrSS	398	9	226	367	1000	0.550724
Built	S40T50T50	T_1	40	50	50	T	1	FC1	620	278	4	98	1000	0.297277
Built	S40T50T50	T_1	40	50	50	T	1	FC5	610	153	14	223	1000	0.615894
Built	S40T50T50	T_1	40	50	50	T	1	FC10	577	88	47	288	1000	0.705934
Built	S40T50T50	T_1	40	50	50	T	1	MTeSPS	523	29	101	347	1000	0.733117
Built	S40T50T50	T_1	40	50	50	T	1	MTP	551	38	73	338	1000	0.767747
Built	S40T50T50	T_1	40	50	50	T	1	MTrSPS	438	13	186	363	1000	0.611443
Built	S40T50T50	T_1	40	50	50	T	1	10PTP	335	7	289	369	1000	0.451022
Built	S40T50T50	T_3	40	50	50	T	3	BTOPA	554	200	70	176	1000	0.382162
Built	S40T50T50	T_3	40	50	50	T	3	EETOD	541	182	83	194	1000	0.404087
Built	S40T50T50	T_3	40	50	50	T	3	ETeSS	450	23	174	353	1000	0.611207
Built	S40T50T50	T_3	40	50	50	T	3	ETrSS	450	23	174	353	1000	0.611207
Built	S40T50T50	T_3	40	50	50	T	3	FC1	624	376	0	0	1000	0
Built	S40T50T50	T_3	40	50	50	T	3	FC5	615	331	9	45	1000	0.126844
Built	S40T50T50	T_3	40	50	50	T	3	FC10	567	234	57	142	1000	0.315861
Built	S40T50T50	T_3	40	50	50	T	3	MTeSPS	460	30	164	346	1000	0.613915
Built	S40T50T50	T_3	40	50	50	T	3	MTP	554	200	70	176	1000	0.382162
Built	S40T50T50	T_3	40	50	50	T	3	MTrSPS	450	23	174	353	1000	0.611207
Built	S40T50T50	T_3	40	50	50	T	3	10PTP	450	23	174	353	1000	0.611207
Built	S40T50T50	T_5	40	50	50	T	5	BTOPA	624	376	0	0	1000	0
Built	S40T50T50	T_5	40	50	50	T	5	EETOD	524	119	100	257	1000	0.528562
Built	S40T50T50	T_5	40	50	50	T	5	ETeSS	463	31	161	345	1000	0.617139
Built	S40T50T50	T_5	40	50	50	T	5	ETrSS	447	28	177	348	1000	0.595022
Built	S40T50T50	T_5	40	50	50	T	5	FC1	624	376	0	0	1000	0
Built	S40T50T50	T_5	40	50	50	T	5	FC5	613	339	11	37	1000	0.0977149
Built	S40T50T50	T_5	40	50	50	T	5	FC10	606	316	18	60	1000	0.155166
Built	S40T50T50	T_5	40	50	50	T	5	MTeSPS	463	31	161	345	1000	0.617139
Built	S40T50T50	T_5	40	50	50	T	5	MTP	556	201	68	175	1000	0.383401
Built	S40T50T50	T_5	40	50	50	T	5	MTrSPS	454	29	170	347	1000	0.605328
Built	S40T50T50	T_5	40	50	50	T	5	10PTP	447	28	177	348	1000	0.595022
Built	S40T50T50	T_025	40	50	50	T	0.25	BTOPA	487	33	137	343	1000	0.656593
Built	S40T50T50	T_025	40	50	50	T	0.25	EETOD	308	7	316	369	1000	0.408295
Built	S40T50T50	T_025	40	50	50	T	0.25	ETeSS	434	20	190	356	1000	0.589369
Built	S40T50T50	T_025	40	50	50	T	0.25	ETrSS	193	4	431	372	1000	0.243668
Built	S40T50T50	T_025	40	50	50	T	0.25	FC1	599	138	25	238	1000	0.630573
Built	S40T50T50	T_025	40	50	50	T	0.25	FC5	491	35	133	341	1000	0.65961
Built	S40T50T50	T_025	40	50	50	T	0.25	FC10	390	14	234	362	1000	0.526544
Built	S40T50T50	T_025	40	50	50	T	0.25	MTeSPS	453	25	171	351	1000	0.612231
Built	S40T50T50	T_025	40	50	50	T	0.25	MTP	214	4	410	372	1000	0.273603
Built	S40T50T50	T_025	40	50	50	T	0.25	MTrSPS	199	4	425	372	1000	0.252165
Built	S40T50T50	T_025	40	50	50	T	0.25	10PTP	141	4	483	372	1000	0.171825
Built	S40T50T50	TQ_1	40	50	50	TQ	1	BTOPA	519	10	105	366	1000	0.766643
Built	S40T50T50	TQ_1	40	50	50	TQ	1	EETOD	456	8	168	368	1000	0.654175
Built	S40T50T50	TQ_1	40	50	50	TQ	1	ETeSS	375	5	249	371	1000	0.520538
Built	S40T50T50	TQ_1	40	50	50	TQ	1	ETrSS	343	4	281	372	1000	0.470205
Built	S40T50T50	TQ_1	40	50	50	TQ	1	FC1	537	11	87	365	1000	0.79922
Built	S40T50T50	TQ_1	40	50	50	TQ	1	FC5	470	8	154	368	1000	0.679497
Built	S40T50T50	TQ_1	40	50	50	TQ	1	FC10	429	6	195	370	1000	0.610556
Built	S40T50T50	TQ_1	40	50	50	TQ	1	MTeSPS	457	8	167	368	1000	0.655972
Built	S40T50T50	TQ_1	40	50	50	TQ	1	MTP	411	6	213	370	1000	0.579319
Built	S40T50T50	TQ_1	40	50	50	TQ	1	MTrSPS	411	6	213	370	1000	0.579319
Built	S40T50T50	TQ_1	40	50	50	TQ	1	10PTP	346	4	278	372	1000	0.475056
Built	S40T50T50	TQ_3	40	50	50	TQ	3	BTOPA	492	10	132	366	1000	0.715718
Built	S40T50T50	TQ_3	40	50	50	TQ	3	EETOD	452	8	172	368	1000	0.647003
Built	S40T50T50	TQ_3	40	50	50	TQ	3	ETeSS	376	6	248	370	1000	0.520088
Built	S40T50T50	TQ_3	40	50	50	TQ	3	ETrSS	334	5	290	371	1000	0.453631
Built	S40T50T50	TQ_3	40	50	50	TQ	3	FC1	515	11	109	365	1000	0.756865
Built	S40T50T50	TQ_3	40	50	50	TQ	3	FC5	451	8	173	368	1000	0.645215
Built	S40T50T50	TQ_3	40	50	50	TQ	3	FC10	401	6	223	370	1000	0.562195
Built	S40T50T50	TQ_3	40	50	50	TQ	3	MTeSPS	450	8	174	368	1000	0.643428
Built	S40T50T50	TQ_3	40	50	50	TQ	3	MTP	427	6	197	370	1000	0.607058
Built	S40T50T50	TQ_3	40	50	50	TQ	3	MTrSPS	365	6	259	370	1000	0.501872
Built	S40T50T50	TQ_3	40	50	50	TQ	3	10PTP	346	5	278	371	1000	0.472951
Built	S40T50T50	TQ_5	40	50	50	TQ	5	BTOPA	546	15	78	361	1000	0.808197
Built	S40T50T50	TQ_5	40	50	50	TQ	5	EETOD	507	10	117	366	1000	0.74384
Built	S40T50T50	TQ_5	40	50	50	TQ	5	ETeSS	331	5	293	371	1000	0.448834
Built	S40T50T50	TQ_5	40	50	50	TQ	5	ETrSS	338	5	286	371	1000	0.460047
Built	S40T50T50	TQ_5	40	50	50	TQ	5	FC1	564	16	60	360	1000	0.841719
Built	S40T50T50	TQ_5	40	50	50	TQ	5	FC5	496	9	128	367	1000	0.725319
Built	S40T50T50	TQ_5	40	50	50	TQ	5	FC10	456	8	168	368	1000	0.654175
Built	S40T50T50	TQ_5	40	50	50	TQ	5	MTeSPS	362	5	262	371	1000	0.499047
Built	S40T50T50	TQ_5	40	50	50	TQ	5	MTP	428	6	196	370	1000	0.608806
Built	S40T50T50	TQ_5	40	50	50	TQ	5	MTrSPS	400	5	224	371	1000	0.56261
Built	S40T50T50	TQ_5	40	50	50	TQ	5	10PTP	349	5	275	371	1000	0.477815
Built	S40T50T50	TQ_025	40	50	50	TQ	0.25	BTOPA	476	16	148	360	1000	0.673296
Built	S40T50T50	TQ_025	40	50	50	TQ	0.25	EETOD	296	4	328	372	1000	0.395924
Built	S40T50T50	TQ_025	40	50	50	TQ	0.25	ETeSS	446	12	178	364	1000	0.627755
Built	S40T50T50	TQ_025	40	50	50	TQ	0.25	ETrSS	195	2	429	374	1000	0.250622
Built	S40T50T50	TQ_025	40	50	50	TQ	0.25	FC1	550	24	74	352	1000	0.796532
Built	S40T50T50	TQ_025	40	50	50	TQ	0.25	FC5	441	10	183	366	1000	0.623159
Built	S40T50T50	TQ_025	40	50	50	TQ	0.25	FC10	349	8	275	368	1000	0.471486
Built	S40T50T50	TQ_025	40	50	50	TQ	0.25	MTeSPS	510	18	114	358	1000	0.732282
Built	S40T50T50	TQ_025	40	50	50	TQ	0.25	MTP	197	2	427	374	1000	0.253456
Built	S40T50T50	TQ_025	40	50	50	TQ	0.25	MTrSPS	197	2	427	374	1000	0.253456
Built	S40T50T50	TQ_025	40	50	50	TQ	0.25	10PTP	115	1	509	375	1000	0.143191
Built	S40T70T30	Auto	40	70	30	Auto	1	BTOPA	498	10	126	366	1000	0.726916
Built	S40T70T30	Auto	40	70	30	Auto	1	EETOD	431	6	193	370	1000	0.61406
Built	S40T70T30	Auto	40	70	30	Auto	1	ETeSS	359	5	265	371	1000	0.494124
Built	S40T70T30	Auto	40	70	30	Auto	1	ETrSS	336	5	288	371	1000	0.456836
Built	S40T70T30	Auto	40	70	30	Auto	1	FC1	521	10	103	366	1000	0.770471
Built	S40T70T30	Auto	40	70	30	Auto	1	FC5	456	6	168	370	1000	0.658438
Built	S40T70T30	Auto	40	70	30	Auto	1	FC10	411	6	213	370	1000	0.579319
Built	S40T70T30	Auto	40	70	30	Auto	1	MTeSPS	425	6	199	370	1000	0.603568
Built	S40T70T30	Auto	40	70	30	Auto	1	MTP	447	6	177	370	1000	0.642338
Built	S40T70T30	Auto	40	70	30	Auto	1	MTrSPS	400	6	224	370	1000	0.560492
Built	S40T70T30	Auto	40	70	30	Auto	1	10PTP	368	5	256	371	1000	0.508933
Built	S40T70T30	H_1	40	70	30	H	1	BTOPA	569	34	55	342	1000	0.812417
Built	S40T70T30	H_1	40	70	30	H	1	EETOD	494	13	130	363	1000	0.713004
Built	S40T70T30	H_1	40	70	30	H	1	ETeSS	409	10	215	366	1000	0.567381
Built	S40T70T30	H_1	40	70	30	H	1	ETrSS	373	9	251	367	1000	0.508752
Built	S40T70T30	H_1	40	70	30	H	1	FC1	618	110	6	266	1000	0.738418
Built	S40T70T30	H_1	40	70	30	H	1	FC5	544	24	80	352	1000	0.78474
Built	S40T70T30	H_1	40	70	30	H	1	FC10	491	13	133	363	1000	0.70742
Built	S40T70T30	H_1	40	70	30	H	1	MTeSPS	465	10	159	366	1000	0.66614
Built	S40T70T30	H_1	40	70	30	H	1	MTP	476	10	148	366	1000	0.686179
Built	S40T70T30	H_1	40	70	30	H	1	MTrSPS	406	10	218	366	1000	0.562239
Built	S40T70T30	H_1	40	70	30	H	1	10PTP	397	9	227	367	1000	0.549026
Built	S40T70T30	H_3	40	70	30	H	3	BTOPA	605	94	19	282	1000	0.74925
Built	S40T70T30	H_3	40	70	30	H	3	EETOD	604	93	20	283	1000	0.749526
Built	S40T70T30	H_3	40	70	30	H	3	ETeSS	409	10	215	366	1000	0.567381
Built	S40T70T30	H_3	40	70	30	H	3	ETrSS	407	10	217	366	1000	0.563951
Built	S40T70T30	H_3	40	70	30	H	3	FC1	624	292	0	84	1000	0.264172
Built	S40T70T30	H_3	40	70	30	H	3	FC5	621	168	3	208	1000	0.600773
Built	S40T70T30	H_3	40	70	30	H	3	FC10	599	85	25	291	1000	0.757905
Built	S40T70T30	H_3	40	70	30	H	3	MTeSPS	468	13	156	363	1000	0.665156
Built	S40T70T30	H_3	40	70	30	H	3	MTP	553	29	71	347	1000	0.791521
Built	S40T70T30	H_3	40	70	30	H	3	MTrSPS	474	14	150	362	1000	0.673941
Built	S40T70T30	H_3	40	70	30	H	3	10PTP	466	13	158	363	1000	0.661526
Built	S40T70T30	H_5	40	70	30	H	5	BTOPA	624	168	0	208	1000	0.607095
Built	S40T70T30	H_5	40	70	30	H	5	EETOD	624	193	0	183	1000	0.541985
Built	S40T70T30	H_5	40	70	30	H	5	ETeSS	413	7	211	369	1000	0.58064
Built	S40T70T30	H_5	40	70	30	H	5	ETrSS	420	7	204	369	1000	0.592746
Built	S40T70T30	H_5	40	70	30	H	5	FC1	624	282	0	94	1000	0.293785
Built	S40T70T30	H_5	40	70	30	H	5	FC5	624	206	0	170	1000	0.507366
Built	S40T70T30	H_5	40	70	30	H	5	FC10	624	156	0	220	1000	0.637681
Built	S40T70T30	H_5	40	70	30	H	5	MTeSPS	486	12	138	364	1000	0.700297
Built	S40T70T30	H_5	40	70	30	H	5	MTP	571	40	53	336	1000	0.803163
Built	S40T70T30	H_5	40	70	30	H	5	MTrSPS	500	16	124	360	1000	0.71776
Built	S40T70T30	H_5	40	70	30	H	5	10PTP	482	12	142	364	1000	0.692914
Built	S40T70T30	H_025	40	70	30	H	0.25	BTOPA	481	9	143	367	1000	0.6975
Built	S40T70T30	H_025	40	70	30	H	0.25	EETOD	359	4	265	372	1000	0.496232
Built	S40T70T30	H_025	40	70	30	H	0.25	ETeSS	335	4	289	372	1000	0.457335
Built	S40T70T30	H_025	40	70	30	H	0.25	ETrSS	306	4	318	372	1000	0.411464
Built	S40T70T30	H_025	40	70	30	H	0.25	FC1	526	14	98	362	1000	0.771466
Built	S40T70T30	H_025	40	70	30	H	0.25	FC5	437	8	187	368	1000	0.620357
Built	S40T70T30	H_025	40	70	30	H	0.25	FC10	382	5	242	371	1000	0.532218
Built	S40T70T30	H_025	40	70	30	H	0.25	MTeSPS	366	5	258	371	1000	0.505632
Built	S40T70T30	H_025	40	70	30	H	0.25	MTP	397	5	227	371	1000	0.557509
Built	S40T70T30	H_025	40	70	30	H	0.25	MTrSPS	362	4	262	372	1000	0.501155
Built	S40T70T30	H_025	40	70	30	H	0.25	10PTP	321	4	303	372	1000	0.435039
Built	S40T70T30	L_1	40	70	30	L	1	BTOPA	569	37	55	339	1000	0.805789
Built	S40T70T30	L_1	40	70	30	L	1	EETOD	510	20	114	356	1000	0.727952
Built	S40T70T30	L_1	40	70	30	L	1	ETeSS	420	11	204	365	1000	0.584229
Built	S40T70T30	L_1	40	70	30	L	1	ETrSS	404	10	220	366	1000	0.558819
Built	S40T70T30	L_1	40	70	30	L	1	FC1	609	102	15	274	1000	0.738648
Built	S40T70T30	L_1	40	70	30	L	1	FC5	570	40	54	336	1000	0.801151
Built	S40T70T30	L_1	40	70	30	L	1	FC10	521	21	103	355	1000	0.746724
Built	S40T70T30	L_1	40	70	30	L	1	MTeSPS	476	16	148	360	1000	0.673296
Built	S40T70T30	L_1	40	70	30	L	1	MTP	506	20	118	356	1000	0.720394
Built	S40T70T30	L_1	40	70	30	L	1	MTrSPS	464	14	160	362	1000	0.655756
Built	S40T70T30	L_1	40	70	30	L	1	10PTP	455	11	169	365	1000	0.64597
Built	S40T70T30	L_3	40	70	30	L	3	BTOPA	566	37	58	339	1000	0.799771
Built	S40T70T30	L_3	40	70	30	L	3	EETOD	532	21	92	355	1000	0.767899
Built	S40T70T30	L_3	40	70	30	L	3	ETeSS	389	10	235	366	1000	0.533376
Built	S40T70T30	L_3	40	70	30	L	3	ETrSS	410	10	214	366	1000	0.569098
Built	S40T70T30	L_3	40	70	30	L	3	FC1	608	99	16	277	1000	0.743683
Built	S40T70T30	L_3	40	70	30	L	3	FC5	570	39	54	337	1000	0.803369
Built	S40T70T30	L_3	40	70	30	L	3	FC10	518	20	106	356	1000	0.743159
Built	S40T70T30	L_3	40	70	30	L	3	MTeSPS	414	10	210	366	1000	0.575984
Built	S40T70T30	L_3	40	70	30	L	3	MTP	545	29	79	347	1000	0.77577
Built	S40T70T30	L_3	40	70	30	L	3	MTrSPS	480	17	144	359	1000	0.678478
Built	S40T70T30	L_3	40	70	30	L	3	10PTP	477	16	147	360	1000	0.675128
Built	S40T70T30	L_5	40	70	30	L	5	BTOPA	582	61	42	315	1000	0.778273
Built	S40T70T30	L_5	40	70	30	L	5	EETOD	551	29	73	347	1000	0.787571
Built	S40T70T30	L_5	40	70	30	L	5	ETeSS	401	10	223	366	1000	0.553701
Built	S40T70T30	L_5	40	70	30	L	5	ETrSS	414	10	210	366	1000	0.575984
Built	S40T70T30	L_5	40	70	30	L	5	FC1	617	125	7	251	1000	0.699989
Built	S40T70T30	L_5	40	70	30	L	5	FC5	593	68	31	308	1000	0.784816
Built	S40T70T30	L_5	40	70	30	L	5	FC10	555	29	69	347	1000	0.795479
Built	S40T70T30	L_5	40	70	30	L	5	MTeSPS	456	12	168	364	1000	0.645625
Built	S40T70T30	L_5	40	70	30	L	5	MTP	551	29	73	347	1000	0.787571
Built	S40T70T30	L_5	40	70	30	L	5	MTrSPS	465	12	159	364	1000	0.661858
Built	S40T70T30	L_5	40	70	30	L	5	10PTP	468	14	156	362	1000	0.663009
Built	S40T70T30	L_025	40	70	30	L	0.25	BTOPA	552	30	72	346	1000	0.787351
Built	S40T70T30	L_025	40	70	30	L	0.25	EETOD	493	17	131	359	1000	0.702525
Built	S40T70T30	L_025	40	70	30	L	0.25	ETeSS	410	10	214	366	1000	0.569098
Built	S40T70T30	L_025	40	70	30	L	0.25	ETrSS	395	10	229	366	1000	0.54351
Built	S40T70T30	L_025	40	70	30	L	0.25	FC1	605	86	19	290	1000	0.768023
Built	S40T70T30	L_025	40	70	30	L	0.25	FC5	552	30	72	346	1000	0.787351
Built	S40T70T30	L_025	40	70	30	L	0.25	FC10	499	19	125	357	1000	0.709406
Built	S40T70T30	L_025	40	70	30	L	0.25	MTeSPS	446	11	178	365	1000	0.629894
Built	S40T70T30	L_025	40	70	30	L	0.25	MTP	510	20	114	356	1000	0.727952
Built	S40T70T30	L_025	40	70	30	L	0.25	MTrSPS	480	16	144	360	1000	0.680634
Built	S40T70T30	L_025	40	70	30	L	0.25	10PTP	457	12	167	364	1000	0.647421
Built	S40T70T30	LQ_1	40	70	30	LQ	1	BTOPA	501	10	123	366	1000	0.732541
Built	S40T70T30	LQ_1	40	70	30	LQ	1	EETOD	434	6	190	370	1000	0.619329
Built	S40T70T30	LQ_1	40	70	30	LQ	1	ETeSS	302	4	322	372	1000	0.405231
Built	S40T70T30	LQ_1	40	70	30	LQ	1	ETrSS	344	4	280	372	1000	0.471821
Built	S40T70T30	LQ_1	40	70	30	LQ	1	FC1	517	10	107	366	1000	0.762824
Built	S40T70T30	LQ_1	40	70	30	LQ	1	FC5	453	7	171	369	1000	0.650926
Built	S40T70T30	LQ_1	40	70	30	LQ	1	FC10	402	6	222	370	1000	0.5639
Built	S40T70T30	LQ_1	40	70	30	LQ	1	MTeSPS	330	4	294	372	1000	0.449339
Built	S40T70T30	LQ_1	40	70	30	LQ	1	MTP	452	7	172	369	1000	0.649135
Built	S40T70T30	LQ_1	40	70	30	LQ	1	MTrSPS	404	6	220	370	1000	0.567315
Built	S40T70T30	LQ_1	40	70	30	LQ	1	10PTP	390	6	234	370	1000	0.543546
Built	S40T70T30	LQ_3	40	70	30	LQ	3	BTOPA	506	10	118	366	1000	0.741952
Built	S40T70T30	LQ_3	40	70	30	LQ	3	EETOD	447	7	177	369	1000	0.640209
Built	S40T70T30	LQ_3	40	70	30	LQ	3	ETeSS	347	5	277	371	1000	0.474571
Built	S40T70T30	LQ_3	40	70	30	LQ	3	ETrSS	346	5	278	371	1000	0.472951
Built	S40T70T30	LQ_3	40	70	30	LQ	3	FC1	523	10	101	366	1000	0.774306
Built	S40T70T30	LQ_3	40	70	30	LQ	3	FC5	454	8	170	368	1000	0.650586
Built	S40T70T30	LQ_3	40	70	30	LQ	3	FC10	408	6	216	370	1000	0.574164
Built	S40T70T30	LQ_3	40	70	30	LQ	3	MTeSPS	378	6	246	370	1000	0.52342
Built	S40T70T30	LQ_3	40	70	30	LQ	3	MTP	434	6	190	370	1000	0.619329
Built	S40T70T30	LQ_3	40	70	30	LQ	3	MTrSPS	413	6	211	370	1000	0.582763
Built	S40T70T30	LQ_3	40	70	30	LQ	3	10PTP	390	6	234	370	1000	0.543546
Built	S40T70T30	LQ_5	40	70	30	LQ	5	BTOPA	522	10	102	366	1000	0.772387
Built	S40T70T30	LQ_5	40	70	30	LQ	5	EETOD	473	9	151	367	1000	0.682832
Built	S40T70T30	LQ_5	40	70	30	LQ	5	ETeSS	325	4	299	372	1000	0.44138
Built	S40T70T30	LQ_5	40	70	30	LQ	5	ETrSS	333	4	291	372	1000	0.454132
Built	S40T70T30	LQ_5	40	70	30	LQ	5	FC1	548	13	76	363	1000	0.816446
Built	S40T70T30	LQ_5	40	70	30	LQ	5	FC5	471	9	153	367	1000	0.679183
Built	S40T70T30	LQ_5	40	70	30	LQ	5	FC10	433	7	191	369	1000	0.615444
Built	S40T70T30	LQ_5	40	70	30	LQ	5	MTeSPS	339	5	285	371	1000	0.461655
Built	S40T70T30	LQ_5	40	70	30	LQ	5	MTP	457	9	167	367	1000	0.653838
Built	S40T70T30	LQ_5	40	70	30	LQ	5	MTrSPS	414	6	210	370	1000	0.584488
Built	S40T70T30	LQ_5	40	70	30	LQ	5	10PTP	389	6	235	370	1000	0.54186
Built	S40T70T30	LQ_025	40	70	30	LQ	0.25	BTOPA	483	10	141	366	1000	0.699045
Built	S40T70T30	LQ_025	40	70	30	LQ	0.25	EETOD	409	6	215	370	1000	0.575881
Built	S40T70T30	LQ_025	40	70	30	LQ	0.25	ETeSS	381	6	243	370	1000	0.528431
Built	S40T70T30	LQ_025	40	70	30	LQ	0.25	ETrSS	313	4	311	372	1000	0.422425
Built	S40T70T30	LQ_025	40	70	30	LQ	0.25	FC1	511	10	113	366	1000	0.751411
Built	S40T70T30	LQ_025	40	70	30	LQ	0.25	FC5	434	6	190	370	1000	0.619329
Built	S40T70T30	LQ_025	40	70	30	LQ	0.25	FC10	387	6	237	370	1000	0.538493
Built	S40T70T30	LQ_025	40	70	30	LQ	0.25	MTeSPS	427	6	197	370	1000	0.607058
Built	S40T70T30	LQ_025	40	70	30	LQ	0.25	MTP	427	6	197	370	1000	0.607058
Built	S40T70T30	LQ_025	40	70	30	LQ	0.25	MTrSPS	368	4	256	372	1000	0.511043
Built	S40T70T30	LQ_025	40	70	30	LQ	0.25	10PTP	359	4	265	372	1000	0.496232
Built	S40T70T30	LQP_1	40	70	30	LQP	1	BTOPA	491	10	133	366	1000	0.713858
Built	S40T70T30	LQP_1	40	70	30	LQP	1	EETOD	433	6	191	370	1000	0.617571
Built	S40T70T30	LQP_1	40	70	30	LQP	1	ETeSS	395	6	229	370	1000	0.551999
Built	S40T70T30	LQP_1	40	70	30	LQP	1	ETrSS	348	5	276	371	1000	0.476192
Built	S40T70T30	LQP_1	40	70	30	LQP	1	FC1	514	10	110	366	1000	0.757109
Built	S40T70T30	LQP_1	40	70	30	LQP	1	FC5	452	7	172	369	1000	0.649135
Built	S40T70T30	LQP_1	40	70	30	LQP	1	FC10	397	6	227	370	1000	0.555391
Built	S40T70T30	LQP_1	40	70	30	LQP	1	MTeSPS	458	7	166	369	1000	0.659904
Built	S40T70T30	LQP_1	40	70	30	LQP	1	MTP	448	6	176	370	1000	0.64412
Built	S40T70T30	LQP_1	40	70	30	LQP	1	MTrSPS	405	6	219	370	1000	0.569025
Built	S40T70T30	LQP_1	40	70	30	LQP	1	10PTP	374	6	250	370	1000	0.516762
Built	S40T70T30	LQP_3	40	70	30	LQP	3	BTOPA	529	11	95	365	1000	0.783709
Built	S40T70T30	LQP_3	40	70	30	LQP	3	EETOD	477	10	147	366	1000	0.688012
Built	S40T70T30	LQP_3	40	70	30	LQP	3	ETeSS	342	5	282	371	1000	0.466487
Built	S40T70T30	LQP_3	40	70	30	LQP	3	ETrSS	344	5	280	371	1000	0.469716
Built	S40T70T30	LQP_3	40	70	30	LQP	3	FC1	555	15	69	361	1000	0.825957
Built	S40T70T30	LQP_3	40	70	30	LQP	3	FC5	481	10	143	366	1000	0.69536
Built	S40T70T30	LQP_3	40	70	30	LQP	3	FC10	441	7	183	369	1000	0.629555
Built	S40T70T30	LQP_3	40	70	30	LQP	3	MTeSPS	371	5	253	371	1000	0.513897
Built	S40T70T30	LQP_3	40	70	30	LQP	3	MTP	456	8	168	368	1000	0.654175
Built	S40T70T30	LQP_3	40	70	30	LQP	3	MTrSPS	413	6	211	370	1000	0.582763
Built	S40T70T30	LQP_3	40	70	30	LQP	3	10PTP	399	6	225	370	1000	0.55879
Built	S40T70T30	LQP_5	40	70	30	LQP	5	BTOPA	558	15	66	361	1000	0.831914
Built	S40T70T30	LQP_5	40	70	30	LQP	5	EETOD	520	11	104	365	1000	0.766408
Built	S40T70T30	LQP_5	40	70	30	LQP	5	ETeSS	350	5	274	371	1000	0.479439
Built	S40T70T30	LQP_5	40	70	30	LQP	5	ETrSS	338	4	286	372	1000	0.46215
Built	S40T70T30	LQP_5	40	70	30	LQP	5	FC1	578	19	46	357	1000	0.863429
Built	S40T70T30	LQP_5	40	70	30	LQP	5	FC5	513	9	111	367	1000	0.757352
Built	S40T70T30	LQP_5	40	70	30	LQP	5	FC10	467	9	157	367	1000	0.671906
Built	S40T70T30	LQP_5	40	70	30	LQP	5	MTeSPS	394	5	230	371	1000	0.552422
Built	S40T70T30	LQP_5	40	70	30	LQP	5	MTP	451	8	173	368	1000	0.645215
Built	S40T70T30	LQP_5	40	70	30	LQP	5	MTrSPS	419	6	205	370	1000	0.593135
Built	S40T70T30	LQP_5	40	70	30	LQP	5	10PTP	374	5	250	371	1000	0.518875
Built	S40T70T30	LQP_025	40	70	30	LQP	0.25	BTOPA	505	10	119	366	1000	0.740066
Built	S40T70T30	LQP_025	40	70	30	LQP	0.25	EETOD	429	6	195	370	1000	0.610556
Built	S40T70T30	LQP_025	40	70	30	LQP	0.25	ETeSS	380	6	244	370	1000	0.526759
Built	S40T70T30	LQP_025	40	70	30	LQP	0.25	ETrSS	349	5	275	371	1000	0.477815
Built	S40T70T30	LQP_025	40	70	30	LQP	0.25	FC1	527	12	97	364	1000	0.7777
Built	S40T70T30	LQP_025	40	70	30	LQP	0.25	FC5	463	7	161	369	1000	0.668926
Built	S40T70T30	LQP_025	40	70	30	LQP	0.25	FC10	405	6	219	370	1000	0.569025
Built	S40T70T30	LQP_025	40	70	30	LQP	0.25	MTeSPS	445	6	179	370	1000	0.638779
Built	S40T70T30	LQP_025	40	70	30	LQP	0.25	MTP	448	6	176	370	1000	0.64412
Built	S40T70T30	LQP_025	40	70	30	LQP	0.25	MTrSPS	448	6	176	370	1000	0.64412
Built	S40T70T30	LQP_025	40	70	30	LQP	0.25	10PTP	400	6	224	370	1000	0.560492
Built	S40T70T30	LQPT_1	40	70	30	LQPT	1	BTOPA	486	9	138	367	1000	0.706727
Built	S40T70T30	LQPT_1	40	70	30	LQPT	1	EETOD	429	7	195	369	1000	0.60843
Built	S40T70T30	LQPT_1	40	70	30	LQPT	1	ETeSS	420	6	204	370	1000	0.59487
Built	S40T70T30	LQPT_1	40	70	30	LQPT	1	ETrSS	305	4	319	372	1000	0.409903
Built	S40T70T30	LQPT_1	40	70	30	LQPT	1	FC1	525	12	99	364	1000	0.77385
Built	S40T70T30	LQPT_1	40	70	30	LQPT	1	FC5	456	7	168	369	1000	0.656307
Built	S40T70T30	LQPT_1	40	70	30	LQPT	1	FC10	403	6	221	370	1000	0.565607
Built	S40T70T30	LQPT_1	40	70	30	LQPT	1	MTeSPS	457	7	167	369	1000	0.658105
Built	S40T70T30	LQPT_1	40	70	30	LQPT	1	MTP	419	6	205	370	1000	0.593135
Built	S40T70T30	LQPT_1	40	70	30	LQPT	1	MTrSPS	403	6	221	370	1000	0.565607
Built	S40T70T30	LQPT_1	40	70	30	LQPT	1	10PTP	336	4	288	372	1000	0.458939
Built	S40T70T30	LQPT_3	40	70	30	LQPT	3	BTOPA	544	12	80	364	1000	0.810743
Built	S40T70T30	LQPT_3	40	70	30	LQPT	3	EETOD	495	10	129	366	1000	0.721309
Built	S40T70T30	LQPT_3	40	70	30	LQPT	3	ETeSS	356	5	268	371	1000	0.489216
Built	S40T70T30	LQPT_3	40	70	30	LQPT	3	ETrSS	348	5	276	371	1000	0.476192
Built	S40T70T30	LQPT_3	40	70	30	LQPT	3	FC1	565	15	59	361	1000	0.845885
Built	S40T70T30	LQPT_3	40	70	30	LQPT	3	FC5	498	10	126	366	1000	0.726916
Built	S40T70T30	LQPT_3	40	70	30	LQPT	3	FC10	454	8	170	368	1000	0.650586
Built	S40T70T30	LQPT_3	40	70	30	LQPT	3	MTeSPS	394	6	230	370	1000	0.550305
Built	S40T70T30	LQPT_3	40	70	30	LQPT	3	MTP	459	8	165	368	1000	0.659572
Built	S40T70T30	LQPT_3	40	70	30	LQPT	3	MTrSPS	433	6	191	370	1000	0.617571
Built	S40T70T30	LQPT_3	40	70	30	LQPT	3	10PTP	403	6	221	370	1000	0.565607
Built	S40T70T30	LQPT_5	40	70	30	LQPT	5	BTOPA	542	12	82	364	1000	0.806826
Built	S40T70T30	LQPT_5	40	70	30	LQPT	5	EETOD	502	10	122	366	1000	0.734419
Built	S40T70T30	LQPT_5	40	70	30	LQPT	5	ETeSS	358	6	266	370	1000	0.490377
Built	S40T70T30	LQPT_5	40	70	30	LQPT	5	ETrSS	330	4	294	372	1000	0.449339
Built	S40T70T30	LQPT_5	40	70	30	LQPT	5	FC1	563	16	61	360	1000	0.83972
Built	S40T70T30	LQPT_5	40	70	30	LQPT	5	FC5	497	10	127	366	1000	0.725045
Built	S40T70T30	LQPT_5	40	70	30	LQPT	5	FC10	450	8	174	368	1000	0.643428
Built	S40T70T30	LQPT_5	40	70	30	LQPT	5	MTeSPS	358	6	266	370	1000	0.490377
Built	S40T70T30	LQPT_5	40	70	30	LQPT	5	MTP	441	8	183	368	1000	0.627425
Built	S40T70T30	LQPT_5	40	70	30	LQPT	5	MTrSPS	402	6	222	370	1000	0.5639
Built	S40T70T30	LQPT_5	40	70	30	LQPT	5	10PTP	378	6	246	370	1000	0.52342
Built	S40T70T30	LQPT_025	40	70	30	LQPT	0.25	BTOPA	460	14	164	362	1000	0.648533
Built	S40T70T30	LQPT_025	40	70	30	LQPT	0.25	EETOD	302	4	322	372	1000	0.405231
Built	S40T70T30	LQPT_025	40	70	30	LQPT	0.25	ETeSS	434	11	190	365	1000	0.608675
Built	S40T70T30	LQPT_025	40	70	30	LQPT	0.25	ETrSS	214	3	410	373	1000	0.275672
Built	S40T70T30	LQPT_025	40	70	30	LQPT	0.25	FC1	538	30	86	346	1000	0.759902
Built	S40T70T30	LQPT_025	40	70	30	LQPT	0.25	FC5	423	10	201	366	1000	0.591573
Built	S40T70T30	LQPT_025	40	70	30	LQPT	0.25	FC10	335	5	289	371	1000	0.455233
Built	S40T70T30	LQPT_025	40	70	30	LQPT	0.25	MTeSPS	487	15	137	361	1000	0.695698
Built	S40T70T30	LQPT_025	40	70	30	LQPT	0.25	MTP	234	3	390	373	1000	0.3047
Built	S40T70T30	LQPT_025	40	70	30	LQPT	0.25	MTrSPS	192	2	432	374	1000	0.246381
Built	S40T70T30	LQPT_025	40	70	30	LQPT	0.25	10PTP	144	1	480	375	1000	0.182028
Built	S40T70T30	LQPTH_1	40	70	30	LQPTH	1	BTOPA	507	10	117	366	1000	0.74384
Built	S40T70T30	LQPTH_1	40	70	30	LQPTH	1	EETOD	444	7	180	369	1000	0.634874
Built	S40T70T30	LQPTH_1	40	70	30	LQPTH	1	ETeSS	363	5	261	371	1000	0.500691
Built	S40T70T30	LQPTH_1	40	70	30	LQPTH	1	ETrSS	347	4	277	372	1000	0.476676
Built	S40T70T30	LQPTH_1	40	70	30	LQPTH	1	FC1	529	10	95	366	1000	0.785858
Built	S40T70T30	LQPTH_1	40	70	30	LQPTH	1	FC5	461	8	163	368	1000	0.663179
Built	S40T70T30	LQPTH_1	40	70	30	LQPTH	1	FC10	423	6	201	370	1000	0.600083
Built	S40T70T30	LQPTH_1	40	70	30	LQPTH	1	MTeSPS	361	5	263	371	1000	0.497405
Built	S40T70T30	LQPTH_1	40	70	30	LQPTH	1	MTP	441	7	183	369	1000	0.629555
Built	S40T70T30	LQPTH_1	40	70	30	LQPTH	1	MTrSPS	418	6	206	370	1000	0.591402
Built	S40T70T30	LQPTH_1	40	70	30	LQPTH	1	10PTP	375	6	249	370	1000	0.518425
Built	S40T70T30	LQPTH_3	40	70	30	LQPTH	3	BTOPA	533	12	91	364	1000	0.789297
Built	S40T70T30	LQPTH_3	40	70	30	LQPTH	3	EETOD	483	9	141	367	1000	0.701186
Built	S40T70T30	LQPTH_3	40	70	30	LQPTH	3	ETeSS	344	5	280	371	1000	0.469716
Built	S40T70T30	LQPTH_3	40	70	30	LQPTH	3	ETrSS	344	5	280	371	1000	0.469716
Built	S40T70T30	LQPTH_3	40	70	30	LQPTH	3	FC1	560	15	64	361	1000	0.835895
Built	S40T70T30	LQPTH_3	40	70	30	LQPTH	3	FC5	494	9	130	367	1000	0.721586
Built	S40T70T30	LQPTH_3	40	70	30	LQPTH	3	FC10	455	8	169	368	1000	0.65238
Built	S40T70T30	LQPTH_3	40	70	30	LQPTH	3	MTeSPS	395	5	229	371	1000	0.554116
Built	S40T70T30	LQPTH_3	40	70	30	LQPTH	3	MTP	455	8	169	368	1000	0.65238
Built	S40T70T30	LQPTH_3	40	70	30	LQPTH	3	MTrSPS	421	6	203	370	1000	0.596606
Built	S40T70T30	LQPTH_3	40	70	30	LQPTH	3	10PTP	398	5	226	371	1000	0.559207
Built	S40T70T30	LQPTH_5	40	70	30	LQPTH	5	BTOPA	544	13	80	363	1000	0.808588
Built	S40T70T30	LQPTH_5	40	70	30	LQPTH	5	EETOD	499	10	125	366	1000	0.728789
Built	S40T70T30	LQPTH_5	40	70	30	LQPTH	5	ETeSS	368	6	256	370	1000	0.506822
Built	S40T70T30	LQPTH_5	40	70	30	LQPTH	5	ETrSS	336	5	288	371	1000	0.456836
Built	S40T70T30	LQPTH_5	40	70	30	LQPTH	5	FC1	568	15	56	361	1000	0.851903
Built	S40T70T30	LQPTH_5	40	70	30	LQPTH	5	FC5	494	10	130	366	1000	0.719443
Built	S40T70T30	LQPTH_5	40	70	30	LQPTH	5	FC10	447	8	177	368	1000	0.638078
Built	S40T70T30	LQPTH_5	40	70	30	LQPTH	5	MTeSPS	425	7	199	369	1000	0.601443
Built	S40T70T30	LQPTH_5	40	70	30	LQPTH	5	MTP	442	7	182	369	1000	0.631326
Built	S40T70T30	LQPTH_5	40	70	30	LQPTH	5	MTrSPS	392	6	232	370	1000	0.546922
Built	S40T70T30	LQPTH_5	40	70	30	LQPTH	5	10PTP	364	6	260	370	1000	0.500225
Built	S40T70T30	LQPTH_025	40	70	30	LQPTH	0.25	BTOPA	453	14	171	362	1000	0.635959
Built	S40T70T30	LQPTH_025	40	70	30	LQPTH	0.25	EETOD	282	5	342	371	1000	0.372314
Built	S40T70T30	LQPTH_025	40	70	30	LQPTH	0.25	ETeSS	410	11	214	365	1000	0.566968
Built	S40T70T30	LQPTH_025	40	70	30	LQPTH	0.25	ETrSS	158	3	466	373	1000	0.197017
Built	S40T70T30	LQPTH_025	40	70	30	LQPTH	0.25	FC1	543	29	81	347	1000	0.771852
Built	S40T70T30	LQPTH_025	40	70	30	LQPTH	0.25	FC5	410	11	214	365	1000	0.566968
Built	S40T70T30	LQPTH_025	40	70	30	LQPTH	0.25	FC10	322	6	302	370	1000	0.432421
Built	S40T70T30	LQPTH_025	40	70	30	LQPTH	0.25	MTeSPS	411	11	213	365	1000	0.568687
Built	S40T70T30	LQPTH_025	40	70	30	LQPTH	0.25	MTP	188	3	436	373	1000	0.238683
Built	S40T70T30	LQPTH_025	40	70	30	LQPTH	0.25	MTrSPS	160	3	464	373	1000	0.199761
Built	S40T70T30	LQPTH_025	40	70	30	LQPTH	0.25	10PTP	101	1	523	375	1000	0.124776
Built	S40T70T30	PT_1	40	70	30	PT	1	BTOPA	523	17	101	359	1000	0.759223
Built	S40T70T30	PT_1	40	70	30	PT	1	EETOD	474	10	150	366	1000	0.68252
Built	S40T70T30	PT_1	40	70	30	PT	1	ETeSS	420	7	204	369	1000	0.592746
Built	S40T70T30	PT_1	40	70	30	PT	1	ETrSS	320	4	304	372	1000	0.433457
Built	S40T70T30	PT_1	40	70	30	PT	1	FC1	572	26	52	350	1000	0.83603
Built	S40T70T30	PT_1	40	70	30	PT	1	FC5	495	12	129	364	1000	0.717017
Built	S40T70T30	PT_1	40	70	30	PT	1	FC10	450	9	174	367	1000	0.641295
Built	S40T70T30	PT_1	40	70	30	PT	1	MTeSPS	463	10	161	366	1000	0.66252
Built	S40T70T30	PT_1	40	70	30	PT	1	MTP	459	9	165	367	1000	0.657437
Built	S40T70T30	PT_1	40	70	30	PT	1	MTrSPS	398	7	226	369	1000	0.55497
Built	S40T70T30	PT_1	40	70	30	PT	1	10PTP	378	6	246	370	1000	0.52342
Built	S40T70T30	PT_3	40	70	30	PT	3	BTOPA	549	15	75	361	1000	0.814099
Built	S40T70T30	PT_3	40	70	30	PT	3	EETOD	511	12	113	364	1000	0.747115
Built	S40T70T30	PT_3	40	70	30	PT	3	ETeSS	396	6	228	370	1000	0.553694
Built	S40T70T30	PT_3	40	70	30	PT	3	ETrSS	372	6	252	370	1000	0.513443
Built	S40T70T30	PT_3	40	70	30	PT	3	FC1	578	27	46	349	1000	0.845979
Built	S40T70T30	PT_3	40	70	30	PT	3	FC5	519	12	105	364	1000	0.762346
Built	S40T70T30	PT_3	40	70	30	PT	3	FC10	472	10	152	366	1000	0.678867
Built	S40T70T30	PT_3	40	70	30	PT	3	MTeSPS	445	9	179	367	1000	0.632387
Built	S40T70T30	PT_3	40	70	30	PT	3	MTP	479	12	145	364	1000	0.687395
Built	S40T70T30	PT_3	40	70	30	PT	3	MTrSPS	439	8	185	368	1000	0.623887
Built	S40T70T30	PT_3	40	70	30	PT	3	10PTP	410	7	214	369	1000	0.575477
Built	S40T70T30	PT_5	40	70	30	PT	5	BTOPA	562	19	62	357	1000	0.831219
Built	S40T70T30	PT_5	40	70	30	PT	5	EETOD	523	12	101	364	1000	0.770007
Built	S40T70T30	PT_5	40	70	30	PT	5	ETeSS	408	9	216	367	1000	0.567793
Built	S40T70T30	PT_5	40	70	30	PT	5	ETrSS	370	6	254	370	1000	0.510129
Built	S40T70T30	PT_5	40	70	30	PT	5	FC1	592	37	32	339	1000	0.852567
Built	S40T70T30	PT_5	40	70	30	PT	5	FC5	532	12	92	364	1000	0.787359
Built	S40T70T30	PT_5	40	70	30	PT	5	FC10	488	12	136	364	1000	0.704
Built	S40T70T30	PT_5	40	70	30	PT	5	MTeSPS	459	10	165	366	1000	0.6553
Built	S40T70T30	PT_5	40	70	30	PT	5	MTP	474	10	150	366	1000	0.68252
Built	S40T70T30	PT_5	40	70	30	PT	5	MTrSPS	423	9	201	367	1000	0.593704
Built	S40T70T30	PT_5	40	70	30	PT	5	10PTP	401	9	223	367	1000	0.555828
Built	S40T70T30	PT_025	40	70	30	PT	0.25	BTOPA	485	19	139	357	1000	0.683372
Built	S40T70T30	PT_025	40	70	30	PT	0.25	EETOD	291	6	333	370	1000	0.384022
Built	S40T70T30	PT_025	40	70	30	PT	0.25	ETeSS	475	17	149	359	1000	0.669312
Built	S40T70T30	PT_025	40	70	30	PT	0.25	ETrSS	172	3	452	373	1000	0.216328
Built	S40T70T30	PT_025	40	70	30	PT	0.25	FC1	585	62	39	314	1000	0.782113
Built	S40T70T30	PT_025	40	70	30	PT	0.25	FC5	438	15	186	361	1000	0.607158
Built	S40T70T30	PT_025	40	70	30	PT	0.25	FC10	342	6	282	370	1000	0.464381
Built	S40T70T30	PT_025	40	70	30	PT	0.25	MTeSPS	454	17	170	359	1000	0.631303
Built	S40T70T30	PT_025	40	70	30	PT	0.25	MTP	224	4	400	372	1000	0.288051
Built	S40T70T30	PT_025	40	70	30	PT	0.25	MTrSPS	150	3	474	373	1000	0.186085
Built	S40T70T30	PT_025	40	70	30	PT	0.25	10PTP	119	2	505	374	1000	0.146453
Built	S40T70T30	Q_1	40	70	30	Q	1	BTOPA	486	10	138	366	1000	0.704586
Built	S40T70T30	Q_1	40	70	30	Q	1	EETOD	439	7	185	369	1000	0.626017
Built	S40T70T30	Q_1	40	70	30	Q	1	ETeSS	350	5	274	371	1000	0.479439
Built	S40T70T30	Q_1	40	70	30	Q	1	ETrSS	342	5	282	371	1000	0.466487
Built	S40T70T30	Q_1	40	70	30	Q	1	FC1	505	10	119	366	1000	0.740066
Built	S40T70T30	Q_1	40	70	30	Q	1	FC5	442	7	182	369	1000	0.631326
Built	S40T70T30	Q_1	40	70	30	Q	1	FC10	405	6	219	370	1000	0.569025
Built	S40T70T30	Q_1	40	70	30	Q	1	MTeSPS	385	6	239	370	1000	0.535133
Built	S40T70T30	Q_1	40	70	30	Q	1	MTP	449	7	175	369	1000	0.643774
Built	S40T70T30	Q_1	40	70	30	Q	1	MTrSPS	422	6	202	370	1000	0.598344
Built	S40T70T30	Q_1	40	70	30	Q	1	10PTP	406	6	218	370	1000	0.570736
Built	S40T70T30	Q_3	40	70	30	Q	3	BTOPA	511	10	113	366	1000	0.751411
Built	S40T70T30	Q_3	40	70	30	Q	3	EETOD	468	8	156	368	1000	0.675859
Built	S40T70T30	Q_3	40	70	30	Q	3	ETeSS	317	5	307	371	1000	0.426622
Built	S40T70T30	Q_3	40	70	30	Q	3	ETrSS	353	5	271	371	1000	0.48432
Built	S40T70T30	Q_3	40	70	30	Q	3	FC1	525	10	99	366	1000	0.778149
Built	S40T70T30	Q_3	40	70	30	Q	3	FC5	463	8	161	368	1000	0.666793
Built	S40T70T30	Q_3	40	70	30	Q	3	FC10	423	6	201	370	1000	0.600083
Built	S40T70T30	Q_3	40	70	30	Q	3	MTeSPS	347	5	277	371	1000	0.474571
Built	S40T70T30	Q_3	40	70	30	Q	3	MTP	475	10	149	366	1000	0.684348
Built	S40T70T30	Q_3	40	70	30	Q	3	MTrSPS	415	6	209	370	1000	0.586214
Built	S40T70T30	Q_3	40	70	30	Q	3	10PTP	408	6	216	370	1000	0.574164
Built	S40T70T30	Q_5	40	70	30	Q	5	BTOPA	516	10	108	366	1000	0.760917
Built	S40T70T30	Q_5	40	70	30	Q	5	EETOD	471	9	153	367	1000	0.679183
Built	S40T70T30	Q_5	40	70	30	Q	5	ETeSS	354	5	270	371	1000	0.485951
Built	S40T70T30	Q_5	40	70	30	Q	5	ETrSS	331	5	293	371	1000	0.448834
Built	S40T70T30	Q_5	40	70	30	Q	5	FC1	532	11	92	365	1000	0.789511
Built	S40T70T30	Q_5	40	70	30	Q	5	FC5	466	9	158	367	1000	0.670091
Built	S40T70T30	Q_5	40	70	30	Q	5	FC10	426	6	198	370	1000	0.605312
Built	S40T70T30	Q_5	40	70	30	Q	5	MTeSPS	403	6	221	370	1000	0.565607
Built	S40T70T30	Q_5	40	70	30	Q	5	MTP	482	10	142	366	1000	0.697202
Built	S40T70T30	Q_5	40	70	30	Q	5	MTrSPS	407	6	217	370	1000	0.57245
Built	S40T70T30	Q_5	40	70	30	Q	5	10PTP	386	6	238	370	1000	0.536812
Built	S40T70T30	Q_025	40	70	30	Q	0.25	BTOPA	502	10	122	366	1000	0.734419
Built	S40T70T30	Q_025	40	70	30	Q	0.25	EETOD	451	7	173	369	1000	0.647346
Built	S40T70T30	Q_025	40	70	30	Q	0.25	ETeSS	346	5	278	371	1000	0.472951
Built	S40T70T30	Q_025	40	70	30	Q	0.25	ETrSS	366	5	258	371	1000	0.505632
Built	S40T70T30	Q_025	40	70	30	Q	0.25	FC1	517	10	107	366	1000	0.762824
Built	S40T70T30	Q_025	40	70	30	Q	0.25	FC5	455	8	169	368	1000	0.65238
Built	S40T70T30	Q_025	40	70	30	Q	0.25	FC10	416	6	208	370	1000	0.587942
Built	S40T70T30	Q_025	40	70	30	Q	0.25	MTeSPS	375	6	249	370	1000	0.518425
Built	S40T70T30	Q_025	40	70	30	Q	0.25	MTP	473	9	151	367	1000	0.682832
Built	S40T70T30	Q_025	40	70	30	Q	0.25	MTrSPS	418	6	206	370	1000	0.591402
Built	S40T70T30	Q_025	40	70	30	Q	0.25	10PTP	407	6	217	370	1000	0.57245
Built	S40T70T30	QH_1	40	70	30	QH	1	BTOPA	495	9	129	367	1000	0.723451
Built	S40T70T30	QH_1	40	70	30	QH	1	EETOD	414	5	210	371	1000	0.586608
Built	S40T70T30	QH_1	40	70	30	QH	1	ETeSS	368	5	256	371	1000	0.508933
Built	S40T70T30	QH_1	40	70	30	QH	1	ETrSS	341	5	283	371	1000	0.464875
Built	S40T70T30	QH_1	40	70	30	QH	1	FC1	521	12	103	364	1000	0.766173
Built	S40T70T30	QH_1	40	70	30	QH	1	FC5	455	7	169	369	1000	0.654512
Built	S40T70T30	QH_1	40	70	30	QH	1	FC10	414	6	210	370	1000	0.584488
Built	S40T70T30	QH_1	40	70	30	QH	1	MTeSPS	397	5	227	371	1000	0.557509
Built	S40T70T30	QH_1	40	70	30	QH	1	MTP	434	6	190	370	1000	0.619329
Built	S40T70T30	QH_1	40	70	30	QH	1	MTrSPS	405	5	219	371	1000	0.571144
Built	S40T70T30	QH_1	40	70	30	QH	1	10PTP	377	5	247	371	1000	0.523867
Built	S40T70T30	QH_3	40	70	30	QH	3	BTOPA	508	10	116	366	1000	0.74573
Built	S40T70T30	QH_3	40	70	30	QH	3	EETOD	457	7	167	369	1000	0.658105
Built	S40T70T30	QH_3	40	70	30	QH	3	ETeSS	321	5	303	371	1000	0.43294
Built	S40T70T30	QH_3	40	70	30	QH	3	ETrSS	343	5	281	371	1000	0.468101
Built	S40T70T30	QH_3	40	70	30	QH	3	FC1	522	10	102	366	1000	0.772387
Built	S40T70T30	QH_3	40	70	30	QH	3	FC5	460	7	164	369	1000	0.663508
Built	S40T70T30	QH_3	40	70	30	QH	3	FC10	414	6	210	370	1000	0.584488
Built	S40T70T30	QH_3	40	70	30	QH	3	MTeSPS	360	5	264	371	1000	0.495764
Built	S40T70T30	QH_3	40	70	30	QH	3	MTP	454	7	170	369	1000	0.652718
Built	S40T70T30	QH_3	40	70	30	QH	3	MTrSPS	427	6	197	370	1000	0.607058
Built	S40T70T30	QH_3	40	70	30	QH	3	10PTP	405	6	219	370	1000	0.569025
Built	S40T70T30	QH_5	40	70	30	QH	5	BTOPA	501	10	123	366	1000	0.732541
Built	S40T70T30	QH_5	40	70	30	QH	5	EETOD	460	9	164	367	1000	0.65924
Built	S40T70T30	QH_5	40	70	30	QH	5	ETeSS	367	6	257	370	1000	0.50517
Built	S40T70T30	QH_5	40	70	30	QH	5	ETrSS	322	5	302	371	1000	0.434522
Built	S40T70T30	QH_5	40	70	30	QH	5	FC1	519	10	105	366	1000	0.766643
Built	S40T70T30	QH_5	40	70	30	QH	5	FC5	455	9	169	367	1000	0.650245
Built	S40T70T30	QH_5	40	70	30	QH	5	FC10	422	7	202	369	1000	0.59622
Built	S40T70T30	QH_5	40	70	30	QH	5	MTeSPS	350	6	274	370	1000	0.477331
Built	S40T70T30	QH_5	40	70	30	QH	5	MTP	443	8	181	368	1000	0.630969
Built	S40T70T30	QH_5	40	70	30	QH	5	MTrSPS	382	6	242	370	1000	0.530104
Built	S40T70T30	QH_5	40	70	30	QH	5	10PTP	368	6	256	370	1000	0.506822
Built	S40T70T30	QH_025	40	70	30	QH	0.25	BTOPA	489	11	135	365	1000	0.708
Built	S40T70T30	QH_025	40	70	30	QH	0.25	EETOD	373	5	251	371	1000	0.517214
Built	S40T70T30	QH_025	40	70	30	QH	0.25	ETeSS	336	5	288	371	1000	0.456836
Built	S40T70T30	QH_025	40	70	30	QH	0.25	ETrSS	329	5	295	371	1000	0.445643
Built	S40T70T30	QH_025	40	70	30	QH	0.25	FC1	518	12	106	364	1000	0.760435
Built	S40T70T30	QH_025	40	70	30	QH	0.25	FC5	437	7	187	369	1000	0.622486
Built	S40T70T30	QH_025	40	70	30	QH	0.25	FC10	393	5	231	371	1000	0.550729
Built	S40T70T30	QH_025	40	70	30	QH	0.25	MTeSPS	403	5	221	371	1000	0.567726
Built	S40T70T30	QH_025	40	70	30	QH	0.25	MTP	419	5	205	371	1000	0.595257
Built	S40T70T30	QH_025	40	70	30	QH	0.25	MTrSPS	346	5	278	371	1000	0.472951
Built	S40T70T30	QH_025	40	70	30	QH	0.25	10PTP	338	5	286	371	1000	0.460047
Built	S40T70T30	QP_1	40	70	30	QP	1	BTOPA	501	10	123	366	1000	0.732541
Built	S40T70T30	QP_1	40	70	30	QP	1	EETOD	443	6	181	370	1000	0.635227
Built	S40T70T30	QP_1	40	70	30	QP	1	ETeSS	371	6	253	370	1000	0.511785
Built	S40T70T30	QP_1	40	70	30	QP	1	ETrSS	347	5	277	371	1000	0.474571
Built	S40T70T30	QP_1	40	70	30	QP	1	FC1	524	10	100	366	1000	0.776226
Built	S40T70T30	QP_1	40	70	30	QP	1	FC5	457	6	167	370	1000	0.660235
Built	S40T70T30	QP_1	40	70	30	QP	1	FC10	405	6	219	370	1000	0.569025
Built	S40T70T30	QP_1	40	70	30	QP	1	MTeSPS	459	6	165	370	1000	0.663836
Built	S40T70T30	QP_1	40	70	30	QP	1	MTP	457	6	167	370	1000	0.660235
Built	S40T70T30	QP_1	40	70	30	QP	1	MTrSPS	409	6	215	370	1000	0.575881
Built	S40T70T30	QP_1	40	70	30	QP	1	10PTP	382	6	242	370	1000	0.530104
Built	S40T70T30	QP_3	40	70	30	QP	3	BTOPA	542	12	82	364	1000	0.806826
Built	S40T70T30	QP_3	40	70	30	QP	3	EETOD	490	10	134	366	1000	0.712
Built	S40T70T30	QP_3	40	70	30	QP	3	ETeSS	341	5	283	371	1000	0.464875
Built	S40T70T30	QP_3	40	70	30	QP	3	ETrSS	340	5	284	371	1000	0.463264
Built	S40T70T30	QP_3	40	70	30	QP	3	FC1	563	16	61	360	1000	0.83972
Built	S40T70T30	QP_3	40	70	30	QP	3	FC5	493	10	131	366	1000	0.71758
Built	S40T70T30	QP_3	40	70	30	QP	3	FC10	451	8	173	368	1000	0.645215
Built	S40T70T30	QP_3	40	70	30	QP	3	MTeSPS	372	5	252	371	1000	0.515555
Built	S40T70T30	QP_3	40	70	30	QP	3	MTP	458	8	166	368	1000	0.657771
Built	S40T70T30	QP_3	40	70	30	QP	3	MTrSPS	390	6	234	370	1000	0.543546
Built	S40T70T30	QP_3	40	70	30	QP	3	10PTP	401	6	223	370	1000	0.562195
Built	S40T70T30	QP_5	40	70	30	QP	5	BTOPA	549	16	75	360	1000	0.811937
Built	S40T70T30	QP_5	40	70	30	QP	5	EETOD	506	9	118	367	1000	0.744096
Built	S40T70T30	QP_5	40	70	30	QP	5	ETeSS	389	5	235	371	1000	0.543976
Built	S40T70T30	QP_5	40	70	30	QP	5	ETrSS	327	4	297	372	1000	0.444559
Built	S40T70T30	QP_5	40	70	30	QP	5	FC1	566	19	58	357	1000	0.839222
Built	S40T70T30	QP_5	40	70	30	QP	5	FC5	498	9	126	367	1000	0.729059
Built	S40T70T30	QP_5	40	70	30	QP	5	FC10	452	9	172	367	1000	0.64487
Built	S40T70T30	QP_5	40	70	30	QP	5	MTeSPS	468	9	156	367	1000	0.673722
Built	S40T70T30	QP_5	40	70	30	QP	5	MTP	432	7	192	369	1000	0.613688
Built	S40T70T30	QP_5	40	70	30	QP	5	MTrSPS	397	5	227	371	1000	0.557509
Built	S40T70T30	QP_5	40	70	30	QP	5	10PTP	344	4	280	372	1000	0.471821
Built	S40T70T30	QP_025	40	70	30	QP	0.25	BTOPA	507	10	117	366	1000	0.74384
Built	S40T70T30	QP_025	40	70	30	QP	0.25	EETOD	440	6	184	370	1000	0.629912
Built	S40T70T30	QP_025	40	70	30	QP	0.25	ETeSS	327	5	297	371	1000	0.442459
Built	S40T70T30	QP_025	40	70	30	QP	0.25	ETrSS	352	6	272	370	1000	0.480584
Built	S40T70T30	QP_025	40	70	30	QP	0.25	FC1	529	12	95	364	1000	0.781558
Built	S40T70T30	QP_025	40	70	30	QP	0.25	FC5	464	8	160	368	1000	0.668602
Built	S40T70T30	QP_025	40	70	30	QP	0.25	FC10	415	6	209	370	1000	0.586214
Built	S40T70T30	QP_025	40	70	30	QP	0.25	MTeSPS	361	6	263	370	1000	0.495294
Built	S40T70T30	QP_025	40	70	30	QP	0.25	MTP	461	7	163	369	1000	0.665312
Built	S40T70T30	QP_025	40	70	30	QP	0.25	MTrSPS	452	6	172	370	1000	0.651265
Built	S40T70T30	QP_025	40	70	30	QP	0.25	10PTP	411	6	213	370	1000	0.579319
Built	S40T70T30	T_1	40	70	30	T	1	BTOPA	547	42	77	334	1000	0.751009
Built	S40T70T30	T_1	40	70	30	T	1	EETOD	536	34	88	342	1000	0.747224
Built	S40T70T30	T_1	40	70	30	T	1	ETeSS	462	15	162	361	1000	0.649993
Built	S40T70T30	T_1	40	70	30	T	1	ETrSS	363	8	261	368	1000	0.494353
Built	S40T70T30	T_1	40	70	30	T	1	FC1	615	245	9	131	1000	0.381574
Built	S40T70T30	T_1	40	70	30	T	1	FC5	570	65	54	311	1000	0.74492
Built	S40T70T30	T_1	40	70	30	T	1	FC10	535	34	89	342	1000	0.745283
Built	S40T70T30	T_1	40	70	30	T	1	MTeSPS	413	12	211	364	1000	0.569996
Built	S40T70T30	T_1	40	70	30	T	1	MTP	532	31	92	345	1000	0.746065
Built	S40T70T30	T_1	40	70	30	T	1	MTrSPS	414	12	210	364	1000	0.57172
Built	S40T70T30	T_1	40	70	30	T	1	10PTP	404	11	220	365	1000	0.55669
Built	S40T70T30	T_3	40	70	30	T	3	BTOPA	570	111	54	265	1000	0.637452
Built	S40T70T30	T_3	40	70	30	T	3	EETOD	569	106	55	270	1000	0.647394
Built	S40T70T30	T_3	40	70	30	T	3	ETeSS	461	31	163	345	1000	0.613533
Built	S40T70T30	T_3	40	70	30	T	3	ETrSS	370	7	254	369	1000	0.508015
Built	S40T70T30	T_3	40	70	30	T	3	FC1	621	338	3	38	1000	0.116965
Built	S40T70T30	T_3	40	70	30	T	3	FC5	592	232	32	144	1000	0.370901
Built	S40T70T30	T_3	40	70	30	T	3	FC10	577	137	47	239	1000	0.588301
Built	S40T70T30	T_3	40	70	30	T	3	MTeSPS	555	60	69	316	1000	0.726393
Built	S40T70T30	T_3	40	70	30	T	3	MTP	569	106	55	270	1000	0.647394
Built	S40T70T30	T_3	40	70	30	T	3	MTrSPS	428	14	196	362	1000	0.591745
Built	S40T70T30	T_3	40	70	30	T	3	10PTP	424	10	200	366	1000	0.593313
Built	S40T70T30	T_5	40	70	30	T	5	BTOPA	574	237	50	139	1000	0.321308
Built	S40T70T30	T_5	40	70	30	T	5	EETOD	551	186	73	190	1000	0.412997
Built	S40T70T30	T_5	40	70	30	T	5	ETeSS	478	36	146	340	1000	0.633455
Built	S40T70T30	T_5	40	70	30	T	5	ETrSS	465	33	159	343	1000	0.616381
Built	S40T70T30	T_5	40	70	30	T	5	FC1	624	376	0	0	1000	0
Built	S40T70T30	T_5	40	70	30	T	5	FC5	615	328	9	48	1000	0.136199
Built	S40T70T30	T_5	40	70	30	T	5	FC10	575	246	49	130	1000	0.298274
Built	S40T70T30	T_5	40	70	30	T	5	MTeSPS	514	71	110	305	1000	0.622066
Built	S40T70T30	T_5	40	70	30	T	5	MTP	560	200	64	176	1000	0.393828
Built	S40T70T30	T_5	40	70	30	T	5	MTrSPS	465	33	159	343	1000	0.616381
Built	S40T70T30	T_5	40	70	30	T	5	10PTP	465	33	159	343	1000	0.616381
Built	S40T70T30	T_025	40	70	30	T	0.25	BTOPA	475	26	149	350	1000	0.649826
Built	S40T70T30	T_025	40	70	30	T	0.25	EETOD	302	5	322	371	1000	0.403137
Built	S40T70T30	T_025	40	70	30	T	0.25	ETeSS	447	15	177	361	1000	0.623104
Built	S40T70T30	T_025	40	70	30	T	0.25	ETrSS	187	3	437	373	1000	0.237276
Built	S40T70T30	T_025	40	70	30	T	0.25	FC1	584	96	40	280	1000	0.701335
Built	S40T70T30	T_025	40	70	30	T	0.25	FC5	462	19	162	357	1000	0.64138
Built	S40T70T30	T_025	40	70	30	T	0.25	FC10	362	9	262	367	1000	0.490594
Built	S40T70T30	T_025	40	70	30	T	0.25	MTeSPS	469	22	155	354	1000	0.647573
Built	S40T70T30	T_025	40	70	30	T	0.25	MTP	235	5	389	371	1000	0.302012
Built	S40T70T30	T_025	40	70	30	T	0.25	MTrSPS	200	3	424	373	1000	0.255651
Built	S40T70T30	T_025	40	70	30	T	0.25	10PTP	148	2	476	374	1000	0.185412
Built	S40T70T30	TQ_1	40	70	30	TQ	1	BTOPA	510	9	114	367	1000	0.75166
Built	S40T70T30	TQ_1	40	70	30	TQ	1	EETOD	439	6	185	370	1000	0.628144
Built	S40T70T30	TQ_1	40	70	30	TQ	1	ETeSS	420	6	204	370	1000	0.59487
Built	S40T70T30	TQ_1	40	70	30	TQ	1	ETrSS	334	4	290	372	1000	0.455733
Built	S40T70T30	TQ_1	40	70	30	TQ	1	FC1	528	12	96	364	1000	0.779628
Built	S40T70T30	TQ_1	40	70	30	TQ	1	FC5	464	6	160	370	1000	0.672868
Built	S40T70T30	TQ_1	40	70	30	TQ	1	FC10	426	6	198	370	1000	0.605312
Built	S40T70T30	TQ_1	40	70	30	TQ	1	MTeSPS	460	6	164	370	1000	0.665639
Built	S40T70T30	TQ_1	40	70	30	TQ	1	MTP	427	6	197	370	1000	0.607058
Built	S40T70T30	TQ_1	40	70	30	TQ	1	MTrSPS	401	5	223	371	1000	0.564313
Built	S40T70T30	TQ_1	40	70	30	TQ	1	10PTP	364	5	260	371	1000	0.502336
Built	S40T70T30	TQ_3	40	70	30	TQ	3	BTOPA	513	10	111	366	1000	0.755207
Built	S40T70T30	TQ_3	40	70	30	TQ	3	EETOD	465	9	159	367	1000	0.668278
Built	S40T70T30	TQ_3	40	70	30	TQ	3	ETeSS	324	5	300	371	1000	0.437693
Built	S40T70T30	TQ_3	40	70	30	TQ	3	ETrSS	359	5	265	371	1000	0.494124
Built	S40T70T30	TQ_3	40	70	30	TQ	3	FC1	526	10	98	366	1000	0.780073
Built	S40T70T30	TQ_3	40	70	30	TQ	3	FC5	462	9	162	367	1000	0.66285
Built	S40T70T30	TQ_3	40	70	30	TQ	3	FC10	428	6	196	370	1000	0.608806
Built	S40T70T30	TQ_3	40	70	30	TQ	3	MTeSPS	384	6	240	370	1000	0.533455
Built	S40T70T30	TQ_3	40	70	30	TQ	3	MTP	481	10	143	366	1000	0.69536
Built	S40T70T30	TQ_3	40	70	30	TQ	3	MTrSPS	387	6	237	370	1000	0.538493
Built	S40T70T30	TQ_3	40	70	30	TQ	3	10PTP	403	6	221	370	1000	0.565607
Built	S40T70T30	TQ_5	40	70	30	TQ	5	BTOPA	522	10	102	366	1000	0.772387
Built	S40T70T30	TQ_5	40	70	30	TQ	5	EETOD	487	10	137	366	1000	0.706437
Built	S40T70T30	TQ_5	40	70	30	TQ	5	ETeSS	338	5	286	371	1000	0.460047
Built	S40T70T30	TQ_5	40	70	30	TQ	5	ETrSS	337	5	287	371	1000	0.458441
Built	S40T70T30	TQ_5	40	70	30	TQ	5	FC1	546	13	78	363	1000	0.812513
Built	S40T70T30	TQ_5	40	70	30	TQ	5	FC5	474	9	150	367	1000	0.684659
Built	S40T70T30	TQ_5	40	70	30	TQ	5	FC10	433	7	191	369	1000	0.615444
Built	S40T70T30	TQ_5	40	70	30	TQ	5	MTeSPS	408	6	216	370	1000	0.574164
Built	S40T70T30	TQ_5	40	70	30	TQ	5	MTP	468	8	156	368	1000	0.675859
Built	S40T70T30	TQ_5	40	70	30	TQ	5	MTrSPS	417	6	207	370	1000	0.589671
Built	S40T70T30	TQ_5	40	70	30	TQ	5	10PTP	410	6	214	370	1000	0.577599
Built	S40T70T30	TQ_025	40	70	30	TQ	0.25	BTOPA	470	15	154	361	1000	0.664496
Built	S40T70T30	TQ_025	40	70	30	TQ	0.25	EETOD	299	4	325	372	1000	0.400571
Built	S40T70T30	TQ_025	40	70	30	TQ	0.25	ETeSS	374	6	250	370	1000	0.516762
Built	S40T70T30	TQ_025	40	70	30	TQ	0.25	ETrSS	177	1	447	375	1000	0.227394
Built	S40T70T30	TQ_025	40	70	30	TQ	0.25	FC1	547	30	77	346	1000	0.777502
Built	S40T70T30	TQ_025	40	70	30	TQ	0.25	FC5	431	12	193	364	1000	0.601273
Built	S40T70T30	TQ_025	40	70	30	TQ	0.25	FC10	352	6	272	370	1000	0.480584
Built	S40T70T30	TQ_025	40	70	30	TQ	0.25	MTeSPS	352	6	272	370	1000	0.480584
Built	S40T70T30	TQ_025	40	70	30	TQ	0.25	MTP	233	3	391	373	1000	0.303237
Built	S40T70T30	TQ_025	40	70	30	TQ	0.25	MTrSPS	171	1	453	375	1000	0.219051
Built	S40T70T30	TQ_025	40	70	30	TQ	0.25	10PTP	120	1	504	375	1000	0.14982
Built	S40T90T10	Auto	40	90	10	Auto	1	BTOPA	504	10	120	366	1000	0.738182
Built	S40T90T10	Auto	40	90	10	Auto	1	EETOD	419	6	205	370	1000	0.593135
Built	S40T90T10	Auto	40	90	10	Auto	1	ETeSS	273	2	351	374	1000	0.364879
Built	S40T90T10	Auto	40	90	10	Auto	1	ETrSS	334	5	290	371	1000	0.453631
Built	S40T90T10	Auto	40	90	10	Auto	1	FC1	523	11	101	365	1000	0.772158
Built	S40T90T10	Auto	40	90	10	Auto	1	FC5	462	9	162	367	1000	0.66285
Built	S40T90T10	Auto	40	90	10	Auto	1	FC10	412	6	212	370	1000	0.58104
Built	S40T90T10	Auto	40	90	10	Auto	1	MTeSPS	273	2	351	374	1000	0.364879
Built	S40T90T10	Auto	40	90	10	Auto	1	MTP	446	6	178	370	1000	0.640558
Built	S40T90T10	Auto	40	90	10	Auto	1	MTrSPS	446	6	178	370	1000	0.640558
Built	S40T90T10	Auto	40	90	10	Auto	1	10PTP	389	6	235	370	1000	0.54186
Built	S40T90T10	H_1	40	90	10	H	1	BTOPA	536	20	88	356	1000	0.777829
Built	S40T90T10	H_1	40	90	10	H	1	EETOD	467	11	157	365	1000	0.667627
Built	S40T90T10	H_1	40	90	10	H	1	ETeSS	345	8	279	368	1000	0.465007
Built	S40T90T10	H_1	40	90	10	H	1	ETrSS	354	8	270	368	1000	0.479619
Built	S40T90T10	H_1	40	90	10	H	1	FC1	596	65	28	311	1000	0.797858
Built	S40T90T10	H_1	40	90	10	H	1	FC5	517	15	107	361	1000	0.752065
Built	S40T90T10	H_1	40	90	10	H	1	FC10	462	10	162	366	1000	0.660712
Built	S40T90T10	H_1	40	90	10	H	1	MTeSPS	346	8	278	368	1000	0.466625
Built	S40T90T10	H_1	40	90	10	H	1	MTP	473	11	151	365	1000	0.678551
Built	S40T90T10	H_1	40	90	10	H	1	MTrSPS	407	10	217	366	1000	0.563951
Built	S40T90T10	H_1	40	90	10	H	1	10PTP	396	9	228	367	1000	0.54733
Built	S40T90T10	H_3	40	90	10	H	3	BTOPA	599	88	25	288	1000	0.750895
Built	S40T90T10	H_3	40	90	10	H	3	EETOD	591	76	33	300	1000	0.762312
Built	S40T90T10	H_3	40	90	10	H	3	ETeSS	406	11	218	365	1000	0.560109
Built	S40T90T10	H_3	40	90	10	H	3	ETrSS	397	11	227	365	1000	0.544773
Built	S40T90T10	H_3	40	90	10	H	3	FC1	624	264	0	112	1000	0.346172
Built	S40T90T10	H_3	40	90	10	H	3	FC5	614	132	10	244	1000	0.676532
Built	S40T90T10	H_3	40	90	10	H	3	FC10	568	50	56	326	1000	0.774821
Built	S40T90T10	H_3	40	90	10	H	3	MTeSPS	345	10	279	366	1000	0.460781
Built	S40T90T10	H_3	40	90	10	H	3	MTP	548	29	76	347	1000	0.781661
Built	S40T90T10	H_3	40	90	10	H	3	MTrSPS	473	15	151	361	1000	0.669964
Built	S40T90T10	H_3	40	90	10	H	3	10PTP	461	12	163	364	1000	0.654625
Built	S40T90T10	H_5	40	90	10	H	5	BTOPA	607	128	17	248	1000	0.671738
Built	S40T90T10	H_5	40	90	10	H	5	EETOD	616	142	8	234	1000	0.655976
Built	S40T90T10	H_5	40	90	10	H	5	ETeSS	391	10	233	366	1000	0.536748
Built	S40T90T10	H_5	40	90	10	H	5	ETrSS	439	11	185	365	1000	0.617486
Built	S40T90T10	H_5	40	90	10	H	5	FC1	624	323	0	53	1000	0.169973
Built	S40T90T10	H_5	40	90	10	H	5	FC5	623	216	1	160	1000	0.478275
Built	S40T90T10	H_5	40	90	10	H	5	FC10	614	137	10	239	1000	0.664193
Built	S40T90T10	H_5	40	90	10	H	5	MTeSPS	391	10	233	366	1000	0.536748
Built	S40T90T10	H_5	40	90	10	H	5	MTP	579	67	45	309	1000	0.758512
Built	S40T90T10	H_5	40	90	10	H	5	MTrSPS	516	20	108	356	1000	0.739346
Built	S40T90T10	H_5	40	90	10	H	5	10PTP	488	17	136	359	1000	0.693239
Built	S40T90T10	H_025	40	90	10	H	0.25	BTOPA	483	9	141	367	1000	0.701186
Built	S40T90T10	H_025	40	90	10	H	0.25	EETOD	384	5	240	371	1000	0.53557
Built	S40T90T10	H_025	40	90	10	H	0.25	ETeSS	293	4	331	372	1000	0.39129
Built	S40T90T10	H_025	40	90	10	H	0.25	ETrSS	303	4	321	372	1000	0.406787
Built	S40T90T10	H_025	40	90	10	H	0.25	FC1	520	11	104	365	1000	0.766408
Built	S40T90T10	H_025	40	90	10	H	0.25	FC5	432	7	192	369	1000	0.613688
Built	S40T90T10	H_025	40	90	10	H	0.25	FC10	384	5	240	371	1000	0.53557
Built	S40T90T10	H_025	40	90	10	H	0.25	MTeSPS	293	4	331	372	1000	0.39129
Built	S40T90T10	H_025	40	90	10	H	0.25	MTP	424	7	200	369	1000	0.5997
Built	S40T90T10	H_025	40	90	10	H	0.25	MTrSPS	398	5	226	371	1000	0.559207
Built	S40T90T10	H_025	40	90	10	H	0.25	10PTP	324	4	300	372	1000	0.439792
Built	S40T90T10	L_1	40	90	10	L	1	BTOPA	605	68	19	308	1000	0.809668
Built	S40T90T10	L_1	40	90	10	L	1	EETOD	546	23	78	353	1000	0.790842
Built	S40T90T10	L_1	40	90	10	L	1	ETeSS	407	10	217	366	1000	0.563951
Built	S40T90T10	L_1	40	90	10	L	1	ETrSS	403	10	221	366	1000	0.557112
Built	S40T90T10	L_1	40	90	10	L	1	FC1	621	157	3	219	1000	0.628819
Built	S40T90T10	L_1	40	90	10	L	1	FC5	608	84	16	292	1000	0.778949
Built	S40T90T10	L_1	40	90	10	L	1	FC10	585	41	39	335	1000	0.829334
Built	S40T90T10	L_1	40	90	10	L	1	MTeSPS	417	10	207	366	1000	0.581165
Built	S40T90T10	L_1	40	90	10	L	1	MTP	541	23	83	353	1000	0.78105
Built	S40T90T10	L_1	40	90	10	L	1	MTrSPS	490	11	134	365	1000	0.709856
Built	S40T90T10	L_1	40	90	10	L	1	10PTP	458	10	166	366	1000	0.6535
Built	S40T90T10	L_3	40	90	10	L	3	BTOPA	580	40	44	336	1000	0.821368
Built	S40T90T10	L_3	40	90	10	L	3	EETOD	515	19	109	357	1000	0.739609
Built	S40T90T10	L_3	40	90	10	L	3	ETeSS	326	6	298	370	1000	0.438766
Built	S40T90T10	L_3	40	90	10	L	3	ETrSS	401	10	223	366	1000	0.553701
Built	S40T90T10	L_3	40	90	10	L	3	FC1	613	110	11	266	1000	0.727904
Built	S40T90T10	L_3	40	90	10	L	3	FC5	573	38	51	338	1000	0.811629
Built	S40T90T10	L_3	40	90	10	L	3	FC10	515	18	109	358	1000	0.741773
Built	S40T90T10	L_3	40	90	10	L	3	MTeSPS	326	6	298	370	1000	0.438766
Built	S40T90T10	L_3	40	90	10	L	3	MTP	549	25	75	351	1000	0.792379
Built	S40T90T10	L_3	40	90	10	L	3	MTrSPS	487	12	137	364	1000	0.702148
Built	S40T90T10	L_3	40	90	10	L	3	10PTP	459	11	165	365	1000	0.653161
Built	S40T90T10	L_5	40	90	10	L	5	BTOPA	595	56	29	320	1000	0.816237
Built	S40T90T10	L_5	40	90	10	L	5	EETOD	542	25	82	351	1000	0.778644
Built	S40T90T10	L_5	40	90	10	L	5	ETeSS	375	9	249	367	1000	0.512073
Built	S40T90T10	L_5	40	90	10	L	5	ETrSS	405	10	219	366	1000	0.560528
Built	S40T90T10	L_5	40	90	10	L	5	FC1	619	131	5	245	1000	0.689498
Built	S40T90T10	L_5	40	90	10	L	5	FC5	596	60	28	316	1000	0.80924
Built	S40T90T10	L_5	40	90	10	L	5	FC10	547	25	77	351	1000	0.788445
Built	S40T90T10	L_5	40	90	10	L	5	MTeSPS	375	9	249	367	1000	0.512073
Built	S40T90T10	L_5	40	90	10	L	5	MTP	554	26	70	350	1000	0.800067
Built	S40T90T10	L_5	40	90	10	L	5	MTrSPS	490	12	134	364	1000	0.70771
Built	S40T90T10	L_5	40	90	10	L	5	10PTP	465	11	159	365	1000	0.664
Built	S40T90T10	L_025	40	90	10	L	0.25	BTOPA	577	48	47	328	1000	0.797441
Built	S40T90T10	L_025	40	90	10	L	0.25	EETOD	532	25	92	351	1000	0.759192
Built	S40T90T10	L_025	40	90	10	L	0.25	ETeSS	377	10	247	366	1000	0.51328
Built	S40T90T10	L_025	40	90	10	L	0.25	ETrSS	428	12	196	364	1000	0.596022
Built	S40T90T10	L_025	40	90	10	L	0.25	FC1	612	130	12	246	1000	0.677261
Built	S40T90T10	L_025	40	90	10	L	0.25	FC5	586	63	38	313	1000	0.78188
Built	S40T90T10	L_025	40	90	10	L	0.25	FC10	550	34	74	342	1000	0.774609
Built	S40T90T10	L_025	40	90	10	L	0.25	MTeSPS	381	10	243	366	1000	0.519953
Built	S40T90T10	L_025	40	90	10	L	0.25	MTP	530	25	94	351	1000	0.755325
Built	S40T90T10	L_025	40	90	10	L	0.25	MTrSPS	511	21	113	355	1000	0.727678
Built	S40T90T10	L_025	40	90	10	L	0.25	10PTP	485	14	139	362	1000	0.694152
Built	S40T90T10	LQ_1	40	90	10	LQ	1	BTOPA	500	10	124	366	1000	0.730664
Built	S40T90T10	LQ_1	40	90	10	LQ	1	EETOD	431	6	193	370	1000	0.61406
Built	S40T90T10	LQ_1	40	90	10	LQ	1	ETeSS	281	4	343	372	1000	0.372876
Built	S40T90T10	LQ_1	40	90	10	LQ	1	ETrSS	332	4	292	372	1000	0.452533
Built	S40T90T10	LQ_1	40	90	10	LQ	1	FC1	516	10	108	366	1000	0.760917
Built	S40T90T10	LQ_1	40	90	10	LQ	1	FC5	448	7	176	369	1000	0.641991
Built	S40T90T10	LQ_1	40	90	10	LQ	1	FC10	400	6	224	370	1000	0.560492
Built	S40T90T10	LQ_1	40	90	10	LQ	1	MTeSPS	281	4	343	372	1000	0.372876
Built	S40T90T10	LQ_1	40	90	10	LQ	1	MTP	468	9	156	367	1000	0.673722
Built	S40T90T10	LQ_1	40	90	10	LQ	1	MTrSPS	386	6	238	370	1000	0.536812
Built	S40T90T10	LQ_1	40	90	10	LQ	1	10PTP	392	6	232	370	1000	0.546922
Built	S40T90T10	LQ_3	40	90	10	LQ	3	BTOPA	496	10	128	366	1000	0.723176
Built	S40T90T10	LQ_3	40	90	10	LQ	3	EETOD	443	6	181	370	1000	0.635227
Built	S40T90T10	LQ_3	40	90	10	LQ	3	ETeSS	330	5	294	371	1000	0.447238
Built	S40T90T10	LQ_3	40	90	10	LQ	3	ETrSS	344	5	280	371	1000	0.469716
Built	S40T90T10	LQ_3	40	90	10	LQ	3	FC1	515	10	109	366	1000	0.759012
Built	S40T90T10	LQ_3	40	90	10	LQ	3	FC5	449	7	175	369	1000	0.643774
Built	S40T90T10	LQ_3	40	90	10	LQ	3	FC10	404	6	220	370	1000	0.567315
Built	S40T90T10	LQ_3	40	90	10	LQ	3	MTeSPS	330	5	294	371	1000	0.447238
Built	S40T90T10	LQ_3	40	90	10	LQ	3	MTP	472	10	152	366	1000	0.678867
Built	S40T90T10	LQ_3	40	90	10	LQ	3	MTrSPS	413	6	211	370	1000	0.582763
Built	S40T90T10	LQ_3	40	90	10	LQ	3	10PTP	396	6	228	370	1000	0.553694
Built	S40T90T10	LQ_5	40	90	10	LQ	5	BTOPA	514	10	110	366	1000	0.757109
Built	S40T90T10	LQ_5	40	90	10	LQ	5	EETOD	465	9	159	367	1000	0.668278
Built	S40T90T10	LQ_5	40	90	10	LQ	5	ETeSS	261	2	363	374	1000	0.346787
Built	S40T90T10	LQ_5	40	90	10	LQ	5	ETrSS	336	5	288	371	1000	0.456836
Built	S40T90T10	LQ_5	40	90	10	LQ	5	FC1	537	11	87	365	1000	0.79922
Built	S40T90T10	LQ_5	40	90	10	LQ	5	FC5	466	9	158	367	1000	0.670091
Built	S40T90T10	LQ_5	40	90	10	LQ	5	FC10	426	6	198	370	1000	0.605312
Built	S40T90T10	LQ_5	40	90	10	LQ	5	MTeSPS	261	2	363	374	1000	0.346787
Built	S40T90T10	LQ_5	40	90	10	LQ	5	MTP	475	10	149	366	1000	0.684348
Built	S40T90T10	LQ_5	40	90	10	LQ	5	MTrSPS	421	6	203	370	1000	0.596606
Built	S40T90T10	LQ_5	40	90	10	LQ	5	10PTP	404	6	220	370	1000	0.567315
Built	S40T90T10	LQ_025	40	90	10	LQ	0.25	BTOPA	497	10	127	366	1000	0.725045
Built	S40T90T10	LQ_025	40	90	10	LQ	0.25	EETOD	415	6	209	370	1000	0.586214
Built	S40T90T10	LQ_025	40	90	10	LQ	0.25	ETeSS	349	4	275	372	1000	0.47992
Built	S40T90T10	LQ_025	40	90	10	LQ	0.25	ETrSS	338	4	286	372	1000	0.46215
Built	S40T90T10	LQ_025	40	90	10	LQ	0.25	FC1	521	12	103	364	1000	0.766173
Built	S40T90T10	LQ_025	40	90	10	LQ	0.25	FC5	449	6	175	370	1000	0.645903
Built	S40T90T10	LQ_025	40	90	10	LQ	0.25	FC10	404	6	220	370	1000	0.567315
Built	S40T90T10	LQ_025	40	90	10	LQ	0.25	MTeSPS	349	4	275	372	1000	0.47992
Built	S40T90T10	LQ_025	40	90	10	LQ	0.25	MTP	440	6	184	370	1000	0.629912
Built	S40T90T10	LQ_025	40	90	10	LQ	0.25	MTrSPS	412	6	212	370	1000	0.58104
Built	S40T90T10	LQ_025	40	90	10	LQ	0.25	10PTP	379	6	245	370	1000	0.525089
Built	S40T90T10	LQP_1	40	90	10	LQP	1	BTOPA	506	10	118	366	1000	0.741952
Built	S40T90T10	LQP_1	40	90	10	LQP	1	EETOD	446	6	178	370	1000	0.640558
Built	S40T90T10	LQP_1	40	90	10	LQP	1	ETeSS	354	5	270	371	1000	0.485951
Built	S40T90T10	LQP_1	40	90	10	LQP	1	ETrSS	368	6	256	370	1000	0.506822
Built	S40T90T10	LQP_1	40	90	10	LQP	1	FC1	529	11	95	365	1000	0.783709
Built	S40T90T10	LQP_1	40	90	10	LQP	1	FC5	466	10	158	366	1000	0.667953
Built	S40T90T10	LQP_1	40	90	10	LQP	1	FC10	416	6	208	370	1000	0.587942
Built	S40T90T10	LQP_1	40	90	10	LQP	1	MTeSPS	355	5	269	371	1000	0.487582
Built	S40T90T10	LQP_1	40	90	10	LQP	1	MTP	466	10	158	366	1000	0.667953
Built	S40T90T10	LQP_1	40	90	10	LQP	1	MTrSPS	443	6	181	370	1000	0.635227
Built	S40T90T10	LQP_1	40	90	10	LQP	1	10PTP	393	6	231	370	1000	0.548613
Built	S40T90T10	LQP_3	40	90	10	LQP	3	BTOPA	519	10	105	366	1000	0.766643
Built	S40T90T10	LQP_3	40	90	10	LQP	3	EETOD	465	9	159	367	1000	0.668278
Built	S40T90T10	LQP_3	40	90	10	LQP	3	ETeSS	386	5	238	371	1000	0.538927
Built	S40T90T10	LQP_3	40	90	10	LQP	3	ETrSS	348	5	276	371	1000	0.476192
Built	S40T90T10	LQP_3	40	90	10	LQP	3	FC1	548	12	76	364	1000	0.818602
Built	S40T90T10	LQP_3	40	90	10	LQP	3	FC5	471	10	153	366	1000	0.677044
Built	S40T90T10	LQP_3	40	90	10	LQP	3	FC10	436	6	188	370	1000	0.62285
Built	S40T90T10	LQP_3	40	90	10	LQP	3	MTeSPS	388	5	236	371	1000	0.542292
Built	S40T90T10	LQP_3	40	90	10	LQP	3	MTP	458	8	166	368	1000	0.657771
Built	S40T90T10	LQP_3	40	90	10	LQP	3	MTrSPS	434	6	190	370	1000	0.619329
Built	S40T90T10	LQP_3	40	90	10	LQP	3	10PTP	403	6	221	370	1000	0.565607
Built	S40T90T10	LQP_5	40	90	10	LQP	5	BTOPA	531	11	93	365	1000	0.787575
Built	S40T90T10	LQP_5	40	90	10	LQP	5	EETOD	475	9	149	367	1000	0.686488
Built	S40T90T10	LQP_5	40	90	10	LQP	5	ETeSS	341	5	283	371	1000	0.464875
Built	S40T90T10	LQP_5	40	90	10	LQP	5	ETrSS	330	4	294	372	1000	0.449339
Built	S40T90T10	LQP_5	40	90	10	LQP	5	FC1	553	15	71	361	1000	0.821996
Built	S40T90T10	LQP_5	40	90	10	LQP	5	FC5	484	9	140	367	1000	0.703031
Built	S40T90T10	LQP_5	40	90	10	LQP	5	FC10	441	8	183	368	1000	0.627425
Built	S40T90T10	LQP_5	40	90	10	LQP	5	MTeSPS	341	5	283	371	1000	0.464875
Built	S40T90T10	LQP_5	40	90	10	LQP	5	MTP	445	8	179	368	1000	0.63452
Built	S40T90T10	LQP_5	40	90	10	LQP	5	MTrSPS	392	6	232	370	1000	0.546922
Built	S40T90T10	LQP_5	40	90	10	LQP	5	10PTP	373	5	251	371	1000	0.517214
Built	S40T90T10	LQP_025	40	90	10	LQP	0.25	BTOPA	505	10	119	366	1000	0.740066
Built	S40T90T10	LQP_025	40	90	10	LQP	0.25	EETOD	420	6	204	370	1000	0.59487
Built	S40T90T10	LQP_025	40	90	10	LQP	0.25	ETeSS	286	4	338	372	1000	0.380525
Built	S40T90T10	LQP_025	40	90	10	LQP	0.25	ETrSS	346	4	278	372	1000	0.475056
Built	S40T90T10	LQP_025	40	90	10	LQP	0.25	FC1	525	12	99	364	1000	0.77385
Built	S40T90T10	LQP_025	40	90	10	LQP	0.25	FC5	454	8	170	368	1000	0.650586
Built	S40T90T10	LQP_025	40	90	10	LQP	0.25	FC10	406	6	218	370	1000	0.570736
Built	S40T90T10	LQP_025	40	90	10	LQP	0.25	MTeSPS	286	4	338	372	1000	0.380525
Built	S40T90T10	LQP_025	40	90	10	LQP	0.25	MTP	454	8	170	368	1000	0.650586
Built	S40T90T10	LQP_025	40	90	10	LQP	0.25	MTrSPS	454	8	170	368	1000	0.650586
Built	S40T90T10	LQP_025	40	90	10	LQP	0.25	10PTP	405	6	219	370	1000	0.569025
Built	S40T90T10	LQPT_1	40	90	10	LQPT	1	BTOPA	509	9	115	367	1000	0.749766
Built	S40T90T10	LQPT_1	40	90	10	LQPT	1	EETOD	449	6	175	370	1000	0.645903
Built	S40T90T10	LQPT_1	40	90	10	LQPT	1	ETeSS	301	4	323	372	1000	0.403676
Built	S40T90T10	LQPT_1	40	90	10	LQPT	1	ETrSS	331	4	293	372	1000	0.450935
Built	S40T90T10	LQPT_1	40	90	10	LQPT	1	FC1	533	12	91	364	1000	0.789297
Built	S40T90T10	LQPT_1	40	90	10	LQPT	1	FC5	466	7	158	369	1000	0.674361
Built	S40T90T10	LQPT_1	40	90	10	LQPT	1	FC10	425	6	199	370	1000	0.603568
Built	S40T90T10	LQPT_1	40	90	10	LQPT	1	MTeSPS	301	4	323	372	1000	0.403676
Built	S40T90T10	LQPT_1	40	90	10	LQPT	1	MTP	444	6	180	370	1000	0.637002
Built	S40T90T10	LQPT_1	40	90	10	LQPT	1	MTrSPS	405	6	219	370	1000	0.569025
Built	S40T90T10	LQPT_1	40	90	10	LQPT	1	10PTP	363	4	261	372	1000	0.502799
Built	S40T90T10	LQPT_3	40	90	10	LQPT	3	BTOPA	524	11	100	365	1000	0.774078
Built	S40T90T10	LQPT_3	40	90	10	LQPT	3	EETOD	470	9	154	367	1000	0.677361
Built	S40T90T10	LQPT_3	40	90	10	LQPT	3	ETeSS	394	6	230	370	1000	0.550305
Built	S40T90T10	LQPT_3	40	90	10	LQPT	3	ETrSS	344	5	280	371	1000	0.469716
Built	S40T90T10	LQPT_3	40	90	10	LQPT	3	FC1	550	12	74	364	1000	0.822543
Built	S40T90T10	LQPT_3	40	90	10	LQPT	3	FC5	476	10	148	366	1000	0.686179
Built	S40T90T10	LQPT_3	40	90	10	LQPT	3	FC10	440	6	184	370	1000	0.629912
Built	S40T90T10	LQPT_3	40	90	10	LQPT	3	MTeSPS	394	6	230	370	1000	0.550305
Built	S40T90T10	LQPT_3	40	90	10	LQPT	3	MTP	460	8	164	368	1000	0.661375
Built	S40T90T10	LQPT_3	40	90	10	LQPT	3	MTrSPS	430	6	194	370	1000	0.612307
Built	S40T90T10	LQPT_3	40	90	10	LQPT	3	10PTP	399	6	225	370	1000	0.55879
Built	S40T90T10	LQPT_5	40	90	10	LQPT	5	BTOPA	544	13	80	363	1000	0.808588
Built	S40T90T10	LQPT_5	40	90	10	LQPT	5	EETOD	498	10	126	366	1000	0.726916
Built	S40T90T10	LQPT_5	40	90	10	LQPT	5	ETeSS	320	4	304	372	1000	0.433457
Built	S40T90T10	LQPT_5	40	90	10	LQPT	5	ETrSS	345	5	279	371	1000	0.471333
Built	S40T90T10	LQPT_5	40	90	10	LQPT	5	FC1	565	17	59	359	1000	0.841556
Built	S40T90T10	LQPT_5	40	90	10	LQPT	5	FC5	504	10	120	366	1000	0.738182
Built	S40T90T10	LQPT_5	40	90	10	LQPT	5	FC10	455	8	169	368	1000	0.65238
Built	S40T90T10	LQPT_5	40	90	10	LQPT	5	MTeSPS	320	4	304	372	1000	0.433457
Built	S40T90T10	LQPT_5	40	90	10	LQPT	5	MTP	456	8	168	368	1000	0.654175
Built	S40T90T10	LQPT_5	40	90	10	LQPT	5	MTrSPS	420	6	204	370	1000	0.59487
Built	S40T90T10	LQPT_5	40	90	10	LQPT	5	10PTP	403	6	221	370	1000	0.565607
Built	S40T90T10	LQPT_025	40	90	10	LQPT	0.25	BTOPA	432	14	192	362	1000	0.598747
Built	S40T90T10	LQPT_025	40	90	10	LQPT	0.25	EETOD	266	4	358	372	1000	0.350136
Built	S40T90T10	LQPT_025	40	90	10	LQPT	0.25	ETeSS	373	8	251	368	1000	0.51087
Built	S40T90T10	LQPT_025	40	90	10	LQPT	0.25	ETrSS	166	2	458	374	1000	0.210078
Built	S40T90T10	LQPT_025	40	90	10	LQPT	0.25	FC1	528	24	96	352	1000	0.753646
Built	S40T90T10	LQPT_025	40	90	10	LQPT	0.25	FC5	381	9	243	367	1000	0.522076
Built	S40T90T10	LQPT_025	40	90	10	LQPT	0.25	FC10	308	6	316	370	1000	0.410395
Built	S40T90T10	LQPT_025	40	90	10	LQPT	0.25	MTeSPS	373	8	251	368	1000	0.51087
Built	S40T90T10	LQPT_025	40	90	10	LQPT	0.25	MTP	180	3	444	373	1000	0.227467
Built	S40T90T10	LQPT_025	40	90	10	LQPT	0.25	MTrSPS	164	2	460	374	1000	0.207319
Built	S40T90T10	LQPT_025	40	90	10	LQPT	0.25	10PTP	125	2	499	374	1000	0.154436
Built	S40T90T10	LQPTH_1	40	90	10	LQPTH	1	BTOPA	488	9	136	367	1000	0.710431
Built	S40T90T10	LQPTH_1	40	90	10	LQPTH	1	EETOD	419	5	205	371	1000	0.595257
Built	S40T90T10	LQPTH_1	40	90	10	LQPTH	1	ETeSS	334	4	290	372	1000	0.455733
Built	S40T90T10	LQPTH_1	40	90	10	LQPTH	1	ETrSS	305	4	319	372	1000	0.409903
Built	S40T90T10	LQPTH_1	40	90	10	LQPTH	1	FC1	527	12	97	364	1000	0.7777
Built	S40T90T10	LQPTH_1	40	90	10	LQPTH	1	FC5	450	7	174	369	1000	0.64556
Built	S40T90T10	LQPTH_1	40	90	10	LQPTH	1	FC10	408	5	216	371	1000	0.576284
Built	S40T90T10	LQPTH_1	40	90	10	LQPTH	1	MTeSPS	334	4	290	372	1000	0.455733
Built	S40T90T10	LQPTH_1	40	90	10	LQPTH	1	MTP	426	5	198	371	1000	0.607435
Built	S40T90T10	LQPTH_1	40	90	10	LQPTH	1	MTrSPS	426	5	198	371	1000	0.607435
Built	S40T90T10	LQPTH_1	40	90	10	LQPTH	1	10PTP	344	4	280	372	1000	0.471821
Built	S40T90T10	LQPTH_3	40	90	10	LQPTH	3	BTOPA	517	10	107	366	1000	0.762824
Built	S40T90T10	LQPTH_3	40	90	10	LQPTH	3	EETOD	464	8	160	368	1000	0.668602
Built	S40T90T10	LQPTH_3	40	90	10	LQPTH	3	ETeSS	287	3	337	373	1000	0.384147
Built	S40T90T10	LQPTH_3	40	90	10	LQPTH	3	ETrSS	339	5	285	371	1000	0.461655
Built	S40T90T10	LQPTH_3	40	90	10	LQPTH	3	FC1	539	11	85	365	1000	0.803117
Built	S40T90T10	LQPTH_3	40	90	10	LQPTH	3	FC5	471	10	153	366	1000	0.677044
Built	S40T90T10	LQPTH_3	40	90	10	LQPTH	3	FC10	432	6	192	370	1000	0.615814
Built	S40T90T10	LQPTH_3	40	90	10	LQPTH	3	MTeSPS	287	3	337	373	1000	0.384147
Built	S40T90T10	LQPTH_3	40	90	10	LQPTH	3	MTP	458	8	166	368	1000	0.657771
Built	S40T90T10	LQPTH_3	40	90	10	LQPTH	3	MTrSPS	432	6	192	370	1000	0.615814
Built	S40T90T10	LQPTH_3	40	90	10	LQPTH	3	10PTP	399	6	225	370	1000	0.55879
Built	S40T90T10	LQPTH_5	40	90	10	LQPTH	5	BTOPA	535	12	89	364	1000	0.793179
Built	S40T90T10	LQPTH_5	40	90	10	LQPTH	5	EETOD	501	10	123	366	1000	0.732541
Built	S40T90T10	LQPTH_5	40	90	10	LQPTH	5	ETeSS	327	4	297	372	1000	0.444559
Built	S40T90T10	LQPTH_5	40	90	10	LQPTH	5	ETrSS	328	4	296	372	1000	0.446151
Built	S40T90T10	LQPTH_5	40	90	10	LQPTH	5	FC1	561	15	63	361	1000	0.837889
Built	S40T90T10	LQPTH_5	40	90	10	LQPTH	5	FC5	500	10	124	366	1000	0.730664
Built	S40T90T10	LQPTH_5	40	90	10	LQPTH	5	FC10	451	8	173	368	1000	0.645215
Built	S40T90T10	LQPTH_5	40	90	10	LQPTH	5	MTeSPS	327	4	297	372	1000	0.444559
Built	S40T90T10	LQPTH_5	40	90	10	LQPTH	5	MTP	460	8	164	368	1000	0.661375
Built	S40T90T10	LQPTH_5	40	90	10	LQPTH	5	MTrSPS	391	6	233	370	1000	0.545233
Built	S40T90T10	LQPTH_5	40	90	10	LQPTH	5	10PTP	406	6	218	370	1000	0.570736
Built	S40T90T10	LQPTH_025	40	90	10	LQPTH	0.25	BTOPA	444	16	180	360	1000	0.615626
Built	S40T90T10	LQPTH_025	40	90	10	LQPTH	0.25	EETOD	290	4	334	372	1000	0.386668
Built	S40T90T10	LQPTH_025	40	90	10	LQPTH	0.25	ETeSS	296	4	328	372	1000	0.395924
Built	S40T90T10	LQPTH_025	40	90	10	LQPTH	0.25	ETrSS	155	3	469	373	1000	0.192909
Built	S40T90T10	LQPTH_025	40	90	10	LQPTH	0.25	FC1	538	37	86	339	1000	0.744495
Built	S40T90T10	LQPTH_025	40	90	10	LQPTH	0.25	FC5	397	13	227	363	1000	0.540512
Built	S40T90T10	LQPTH_025	40	90	10	LQPTH	0.25	FC10	312	6	312	370	1000	0.416659
Built	S40T90T10	LQPTH_025	40	90	10	LQPTH	0.25	MTeSPS	296	4	328	372	1000	0.395924
Built	S40T90T10	LQPTH_025	40	90	10	LQPTH	0.25	MTP	190	3	434	373	1000	0.241499
Built	S40T90T10	LQPTH_025	40	90	10	LQPTH	0.25	MTrSPS	170	3	454	373	1000	0.213555
Built	S40T90T10	LQPTH_025	40	90	10	LQPTH	0.25	10PTP	128	2	496	374	1000	0.158443
Built	S40T90T10	PT_1	40	90	10	PT	1	BTOPA	509	14	115	362	1000	0.739023
Built	S40T90T10	PT_1	40	90	10	PT	1	EETOD	459	10	165	366	1000	0.6553
Built	S40T90T10	PT_1	40	90	10	PT	1	ETeSS	403	6	221	370	1000	0.565607
Built	S40T90T10	PT_1	40	90	10	PT	1	ETrSS	329	6	295	370	1000	0.443541
Built	S40T90T10	PT_1	40	90	10	PT	1	FC1	567	27	57	349	1000	0.823784
Built	S40T90T10	PT_1	40	90	10	PT	1	FC5	484	12	140	364	1000	0.696602
Built	S40T90T10	PT_1	40	90	10	PT	1	FC10	439	8	185	368	1000	0.623887
Built	S40T90T10	PT_1	40	90	10	PT	1	MTeSPS	405	6	219	370	1000	0.569025
Built	S40T90T10	PT_1	40	90	10	PT	1	MTP	431	7	193	369	1000	0.611934
Built	S40T90T10	PT_1	40	90	10	PT	1	MTrSPS	417	6	207	370	1000	0.589671
Built	S40T90T10	PT_1	40	90	10	PT	1	10PTP	361	6	263	370	1000	0.495294
Built	S40T90T10	PT_3	40	90	10	PT	3	BTOPA	539	13	85	363	1000	0.798811
Built	S40T90T10	PT_3	40	90	10	PT	3	EETOD	496	12	128	364	1000	0.718885
Built	S40T90T10	PT_3	40	90	10	PT	3	ETeSS	341	5	283	371	1000	0.464875
Built	S40T90T10	PT_3	40	90	10	PT	3	ETrSS	374	6	250	370	1000	0.516762
Built	S40T90T10	PT_3	40	90	10	PT	3	FC1	567	21	57	355	1000	0.83688
Built	S40T90T10	PT_3	40	90	10	PT	3	FC5	508	12	116	364	1000	0.741435
Built	S40T90T10	PT_3	40	90	10	PT	3	FC10	461	8	163	368	1000	0.663179
Built	S40T90T10	PT_3	40	90	10	PT	3	MTeSPS	345	5	279	371	1000	0.471333
Built	S40T90T10	PT_3	40	90	10	PT	3	MTP	484	11	140	365	1000	0.698747
Built	S40T90T10	PT_3	40	90	10	PT	3	MTrSPS	450	7	174	369	1000	0.64556
Built	S40T90T10	PT_3	40	90	10	PT	3	10PTP	401	6	223	370	1000	0.562195
Built	S40T90T10	PT_5	40	90	10	PT	5	BTOPA	555	17	69	359	1000	0.82163
Built	S40T90T10	PT_5	40	90	10	PT	5	EETOD	522	12	102	364	1000	0.768089
Built	S40T90T10	PT_5	40	90	10	PT	5	ETeSS	388	6	236	370	1000	0.540176
Built	S40T90T10	PT_5	40	90	10	PT	5	ETrSS	371	6	253	370	1000	0.511785
Built	S40T90T10	PT_5	40	90	10	PT	5	FC1	582	29	42	347	1000	0.849727
Built	S40T90T10	PT_5	40	90	10	PT	5	FC5	524	12	100	364	1000	0.771928
Built	S40T90T10	PT_5	40	90	10	PT	5	FC10	480	11	144	365	1000	0.691378
Built	S40T90T10	PT_5	40	90	10	PT	5	MTeSPS	400	6	224	370	1000	0.560492
Built	S40T90T10	PT_5	40	90	10	PT	5	MTP	480	11	144	365	1000	0.691378
Built	S40T90T10	PT_5	40	90	10	PT	5	MTrSPS	469	10	155	366	1000	0.673402
Built	S40T90T10	PT_5	40	90	10	PT	5	10PTP	418	7	206	369	1000	0.589279
Built	S40T90T10	PT_025	40	90	10	PT	0.25	BTOPA	461	16	163	360	1000	0.646038
Built	S40T90T10	PT_025	40	90	10	PT	0.25	EETOD	304	6	320	370	1000	0.404153
Built	S40T90T10	PT_025	40	90	10	PT	0.25	ETeSS	335	6	289	370	1000	0.453128
Built	S40T90T10	PT_025	40	90	10	PT	0.25	ETrSS	169	3	455	373	1000	0.21217
Built	S40T90T10	PT_025	40	90	10	PT	0.25	FC1	575	71	49	305	1000	0.741263
Built	S40T90T10	PT_025	40	90	10	PT	0.25	FC5	425	13	199	363	1000	0.58865
Built	S40T90T10	PT_025	40	90	10	PT	0.25	FC10	327	6	297	370	1000	0.440356
Built	S40T90T10	PT_025	40	90	10	PT	0.25	MTeSPS	341	6	283	370	1000	0.462769
Built	S40T90T10	PT_025	40	90	10	PT	0.25	MTP	231	4	393	372	1000	0.298239
Built	S40T90T10	PT_025	40	90	10	PT	0.25	MTrSPS	191	3	433	373	1000	0.242908
Built	S40T90T10	PT_025	40	90	10	PT	0.25	10PTP	141	3	483	373	1000	0.173874
Built	S40T90T10	Q_1	40	90	10	Q	1	BTOPA	491	10	133	366	1000	0.713858
Built	S40T90T10	Q_1	40	90	10	Q	1	EETOD	443	8	181	368	1000	0.630969
Built	S40T90T10	Q_1	40	90	10	Q	1	ETeSS	256	3	368	373	1000	0.337225
Built	S40T90T10	Q_1	40	90	10	Q	1	ETrSS	361	6	263	370	1000	0.495294
Built	S40T90T10	Q_1	40	90	10	Q	1	FC1	508	10	116	366	1000	0.74573
Built	S40T90T10	Q_1	40	90	10	Q	1	FC5	444	8	180	368	1000	0.632744
Built	S40T90T10	Q_1	40	90	10	Q	1	FC10	407	6	217	370	1000	0.57245
Built	S40T90T10	Q_1	40	90	10	Q	1	MTeSPS	256	3	368	373	1000	0.337225
Built	S40T90T10	Q_1	40	90	10	Q	1	MTP	481	9	143	367	1000	0.6975
Built	S40T90T10	Q_1	40	90	10	Q	1	MTrSPS	433	6	191	370	1000	0.617571
Built	S40T90T10	Q_1	40	90	10	Q	1	10PTP	412	6	212	370	1000	0.58104
Built	S40T90T10	Q_3	40	90	10	Q	3	BTOPA	490	10	134	366	1000	0.712
Built	S40T90T10	Q_3	40	90	10	Q	3	EETOD	450	8	174	368	1000	0.643428
Built	S40T90T10	Q_3	40	90	10	Q	3	ETeSS	393	6	231	370	1000	0.548613
Built	S40T90T10	Q_3	40	90	10	Q	3	ETrSS	352	5	272	371	1000	0.482692
Built	S40T90T10	Q_3	40	90	10	Q	3	FC1	509	10	115	366	1000	0.747622
Built	S40T90T10	Q_3	40	90	10	Q	3	FC5	445	8	179	368	1000	0.63452
Built	S40T90T10	Q_3	40	90	10	Q	3	FC10	400	6	224	370	1000	0.560492
Built	S40T90T10	Q_3	40	90	10	Q	3	MTeSPS	399	6	225	370	1000	0.55879
Built	S40T90T10	Q_3	40	90	10	Q	3	MTP	456	8	168	368	1000	0.654175
Built	S40T90T10	Q_3	40	90	10	Q	3	MTrSPS	435	8	189	368	1000	0.616833
Built	S40T90T10	Q_3	40	90	10	Q	3	10PTP	387	6	237	370	1000	0.538493
Built	S40T90T10	Q_5	40	90	10	Q	5	BTOPA	493	10	131	366	1000	0.71758
Built	S40T90T10	Q_5	40	90	10	Q	5	EETOD	446	8	178	368	1000	0.636298
Built	S40T90T10	Q_5	40	90	10	Q	5	ETeSS	327	5	297	371	1000	0.442459
Built	S40T90T10	Q_5	40	90	10	Q	5	ETrSS	315	4	309	372	1000	0.42557
Built	S40T90T10	Q_5	40	90	10	Q	5	FC1	511	10	113	366	1000	0.751411
Built	S40T90T10	Q_5	40	90	10	Q	5	FC5	445	8	179	368	1000	0.63452
Built	S40T90T10	Q_5	40	90	10	Q	5	FC10	404	6	220	370	1000	0.567315
Built	S40T90T10	Q_5	40	90	10	Q	5	MTeSPS	334	5	290	371	1000	0.453631
Built	S40T90T10	Q_5	40	90	10	Q	5	MTP	465	9	159	367	1000	0.668278
Built	S40T90T10	Q_5	40	90	10	Q	5	MTrSPS	389	6	235	370	1000	0.54186
Built	S40T90T10	Q_5	40	90	10	Q	5	10PTP	375	6	249	370	1000	0.518425
Built	S40T90T10	Q_025	40	90	10	Q	0.25	BTOPA	496	10	128	366	1000	0.723176
Built	S40T90T10	Q_025	40	90	10	Q	0.25	EETOD	446	8	178	368	1000	0.636298
Built	S40T90T10	Q_025	40	90	10	Q	0.25	ETeSS	357	6	267	370	1000	0.488741
Built	S40T90T10	Q_025	40	90	10	Q	0.25	ETrSS	362	6	262	370	1000	0.496937
Built	S40T90T10	Q_025	40	90	10	Q	0.25	FC1	518	10	106	366	1000	0.764733
Built	S40T90T10	Q_025	40	90	10	Q	0.25	FC5	452	8	172	368	1000	0.647003
Built	S40T90T10	Q_025	40	90	10	Q	0.25	FC10	412	6	212	370	1000	0.58104
Built	S40T90T10	Q_025	40	90	10	Q	0.25	MTeSPS	360	6	264	370	1000	0.493654
Built	S40T90T10	Q_025	40	90	10	Q	0.25	MTP	466	9	158	367	1000	0.670091
Built	S40T90T10	Q_025	40	90	10	Q	0.25	MTrSPS	434	6	190	370	1000	0.619329
Built	S40T90T10	Q_025	40	90	10	Q	0.25	10PTP	402	6	222	370	1000	0.5639
Built	S40T90T10	QH_1	40	90	10	QH	1	BTOPA	506	10	118	366	1000	0.741952
Built	S40T90T10	QH_1	40	90	10	QH	1	EETOD	425	6	199	370	1000	0.603568
Built	S40T90T10	QH_1	40	90	10	QH	1	ETeSS	337	4	287	372	1000	0.460544
Built	S40T90T10	QH_1	40	90	10	QH	1	ETrSS	345	5	279	371	1000	0.471333
Built	S40T90T10	QH_1	40	90	10	QH	1	FC1	534	13	90	363	1000	0.789083
Built	S40T90T10	QH_1	40	90	10	QH	1	FC5	468	8	156	368	1000	0.675859
Built	S40T90T10	QH_1	40	90	10	QH	1	FC10	425	6	199	370	1000	0.603568
Built	S40T90T10	QH_1	40	90	10	QH	1	MTeSPS	337	4	287	372	1000	0.460544
Built	S40T90T10	QH_1	40	90	10	QH	1	MTP	428	6	196	370	1000	0.608806
Built	S40T90T10	QH_1	40	90	10	QH	1	MTrSPS	428	6	196	370	1000	0.608806
Built	S40T90T10	QH_1	40	90	10	QH	1	10PTP	382	5	242	371	1000	0.532218
Built	S40T90T10	QH_3	40	90	10	QH	3	BTOPA	488	10	136	366	1000	0.708289
Built	S40T90T10	QH_3	40	90	10	QH	3	EETOD	442	6	182	370	1000	0.633454
Built	S40T90T10	QH_3	40	90	10	QH	3	ETeSS	347	5	277	371	1000	0.474571
Built	S40T90T10	QH_3	40	90	10	QH	3	ETrSS	333	5	291	371	1000	0.45203
Built	S40T90T10	QH_3	40	90	10	QH	3	FC1	508	10	116	366	1000	0.74573
Built	S40T90T10	QH_3	40	90	10	QH	3	FC5	449	7	175	369	1000	0.643774
Built	S40T90T10	QH_3	40	90	10	QH	3	FC10	405	6	219	370	1000	0.569025
Built	S40T90T10	QH_3	40	90	10	QH	3	MTeSPS	349	5	275	371	1000	0.477815
Built	S40T90T10	QH_3	40	90	10	QH	3	MTP	466	9	158	367	1000	0.670091
Built	S40T90T10	QH_3	40	90	10	QH	3	MTrSPS	419	6	205	370	1000	0.593135
Built	S40T90T10	QH_3	40	90	10	QH	3	10PTP	395	6	229	370	1000	0.551999
Built	S40T90T10	QH_5	40	90	10	QH	5	BTOPA	505	10	119	366	1000	0.740066
Built	S40T90T10	QH_5	40	90	10	QH	5	EETOD	457	9	167	367	1000	0.653838
Built	S40T90T10	QH_5	40	90	10	QH	5	ETeSS	343	5	281	371	1000	0.468101
Built	S40T90T10	QH_5	40	90	10	QH	5	ETrSS	314	5	310	371	1000	0.4219
Built	S40T90T10	QH_5	40	90	10	QH	5	FC1	520	10	104	366	1000	0.768556
Built	S40T90T10	QH_5	40	90	10	QH	5	FC5	455	8	169	368	1000	0.65238
Built	S40T90T10	QH_5	40	90	10	QH	5	FC10	416	6	208	370	1000	0.587942
Built	S40T90T10	QH_5	40	90	10	QH	5	MTeSPS	344	5	280	371	1000	0.469716
Built	S40T90T10	QH_5	40	90	10	QH	5	MTP	466	9	158	367	1000	0.670091
Built	S40T90T10	QH_5	40	90	10	QH	5	MTrSPS	389	6	235	370	1000	0.54186
Built	S40T90T10	QH_5	40	90	10	QH	5	10PTP	390	6	234	370	1000	0.543546
Built	S40T90T10	QH_025	40	90	10	QH	0.25	BTOPA	484	8	140	368	1000	0.70517
Built	S40T90T10	QH_025	40	90	10	QH	0.25	EETOD	368	5	256	371	1000	0.508933
Built	S40T90T10	QH_025	40	90	10	QH	0.25	ETeSS	342	5	282	371	1000	0.466487
Built	S40T90T10	QH_025	40	90	10	QH	0.25	ETrSS	310	4	314	372	1000	0.417719
Built	S40T90T10	QH_025	40	90	10	QH	0.25	FC1	515	11	109	365	1000	0.756865
Built	S40T90T10	QH_025	40	90	10	QH	0.25	FC5	431	6	193	370	1000	0.61406
Built	S40T90T10	QH_025	40	90	10	QH	0.25	FC10	375	5	249	371	1000	0.520538
Built	S40T90T10	QH_025	40	90	10	QH	0.25	MTeSPS	342	5	282	371	1000	0.466487
Built	S40T90T10	QH_025	40	90	10	QH	0.25	MTP	441	7	183	369	1000	0.629555
Built	S40T90T10	QH_025	40	90	10	QH	0.25	MTrSPS	343	5	281	371	1000	0.468101
Built	S40T90T10	QH_025	40	90	10	QH	0.25	10PTP	326	5	298	371	1000	0.440869
Built	S40T90T10	QP_1	40	90	10	QP	1	BTOPA	508	10	116	366	1000	0.74573
Built	S40T90T10	QP_1	40	90	10	QP	1	EETOD	450	6	174	370	1000	0.647689
Built	S40T90T10	QP_1	40	90	10	QP	1	ETeSS	323	5	301	371	1000	0.436107
Built	S40T90T10	QP_1	40	90	10	QP	1	ETrSS	350	5	274	371	1000	0.479439
Built	S40T90T10	QP_1	40	90	10	QP	1	FC1	534	12	90	364	1000	0.791237
Built	S40T90T10	QP_1	40	90	10	QP	1	FC5	466	10	158	366	1000	0.667953
Built	S40T90T10	QP_1	40	90	10	QP	1	FC10	418	6	206	370	1000	0.591402
Built	S40T90T10	QP_1	40	90	10	QP	1	MTeSPS	323	5	301	371	1000	0.436107
Built	S40T90T10	QP_1	40	90	10	QP	1	MTP	464	8	160	368	1000	0.668602
Built	S40T90T10	QP_1	40	90	10	QP	1	MTrSPS	451	6	173	370	1000	0.649476
Built	S40T90T10	QP_1	40	90	10	QP	1	10PTP	404	6	220	370	1000	0.567315
Built	S40T90T10	QP_3	40	90	10	QP	3	BTOPA	519	11	105	365	1000	0.764496
Built	S40T90T10	QP_3	40	90	10	QP	3	EETOD	464	8	160	368	1000	0.668602
Built	S40T90T10	QP_3	40	90	10	QP	3	ETeSS	406	6	218	370	1000	0.570736
Built	S40T90T10	QP_3	40	90	10	QP	3	ETrSS	339	5	285	371	1000	0.461655
Built	S40T90T10	QP_3	40	90	10	QP	3	FC1	548	12	76	364	1000	0.818602
Built	S40T90T10	QP_3	40	90	10	QP	3	FC5	472	10	152	366	1000	0.678867
Built	S40T90T10	QP_3	40	90	10	QP	3	FC10	433	6	191	370	1000	0.617571
Built	S40T90T10	QP_3	40	90	10	QP	3	MTeSPS	406	6	218	370	1000	0.570736
Built	S40T90T10	QP_3	40	90	10	QP	3	MTP	457	8	167	368	1000	0.655972
Built	S40T90T10	QP_3	40	90	10	QP	3	MTrSPS	412	6	212	370	1000	0.58104
Built	S40T90T10	QP_3	40	90	10	QP	3	10PTP	392	6	232	370	1000	0.546922
Built	S40T90T10	QP_5	40	90	10	QP	5	BTOPA	537	12	87	364	1000	0.797068
Built	S40T90T10	QP_5	40	90	10	QP	5	EETOD	496	9	128	367	1000	0.725319
Built	S40T90T10	QP_5	40	90	10	QP	5	ETeSS	369	5	255	371	1000	0.510586
Built	S40T90T10	QP_5	40	90	10	QP	5	ETrSS	342	5	282	371	1000	0.466487
Built	S40T90T10	QP_5	40	90	10	QP	5	FC1	561	16	63	360	1000	0.835726
Built	S40T90T10	QP_5	40	90	10	QP	5	FC5	501	10	123	366	1000	0.732541
Built	S40T90T10	QP_5	40	90	10	QP	5	FC10	450	8	174	368	1000	0.643428
Built	S40T90T10	QP_5	40	90	10	QP	5	MTeSPS	369	5	255	371	1000	0.510586
Built	S40T90T10	QP_5	40	90	10	QP	5	MTP	449	8	175	368	1000	0.641643
Built	S40T90T10	QP_5	40	90	10	QP	5	MTrSPS	427	6	197	370	1000	0.607058
Built	S40T90T10	QP_5	40	90	10	QP	5	10PTP	402	6	222	370	1000	0.5639
Built	S40T90T10	QP_025	40	90	10	QP	0.25	BTOPA	509	11	115	365	1000	0.745475
Built	S40T90T10	QP_025	40	90	10	QP	0.25	EETOD	439	6	185	370	1000	0.628144
Built	S40T90T10	QP_025	40	90	10	QP	0.25	ETeSS	306	4	318	372	1000	0.411464
Built	S40T90T10	QP_025	40	90	10	QP	0.25	ETrSS	338	5	286	371	1000	0.460047
Built	S40T90T10	QP_025	40	90	10	QP	0.25	FC1	534	12	90	364	1000	0.791237
Built	S40T90T10	QP_025	40	90	10	QP	0.25	FC5	466	7	158	369	1000	0.674361
Built	S40T90T10	QP_025	40	90	10	QP	0.25	FC10	418	6	206	370	1000	0.591402
Built	S40T90T10	QP_025	40	90	10	QP	0.25	MTeSPS	306	4	318	372	1000	0.411464
Built	S40T90T10	QP_025	40	90	10	QP	0.25	MTP	442	6	182	370	1000	0.633454
Built	S40T90T10	QP_025	40	90	10	QP	0.25	MTrSPS	442	6	182	370	1000	0.633454
Built	S40T90T10	QP_025	40	90	10	QP	0.25	10PTP	399	6	225	370	1000	0.55879
Built	S40T90T10	T_1	40	90	10	T	1	BTOPA	532	27	92	349	1000	0.754825
Built	S40T90T10	T_1	40	90	10	T	1	EETOD	512	25	112	351	1000	0.720878
Built	S40T90T10	T_1	40	90	10	T	1	ETeSS	446	10	178	366	1000	0.632031
Built	S40T90T10	T_1	40	90	10	T	1	ETrSS	328	6	296	370	1000	0.441948
Built	S40T90T10	T_1	40	90	10	T	1	FC1	612	201	12	175	1000	0.49571
Built	S40T90T10	T_1	40	90	10	T	1	FC5	554	45	70	331	1000	0.758123
Built	S40T90T10	T_1	40	90	10	T	1	FC10	501	21	123	355	1000	0.708823
Built	S40T90T10	T_1	40	90	10	T	1	MTeSPS	447	10	177	366	1000	0.63381
Built	S40T90T10	T_1	40	90	10	T	1	MTP	522	25	102	351	1000	0.739937
Built	S40T90T10	T_1	40	90	10	T	1	MTrSPS	447	11	177	365	1000	0.631673
Built	S40T90T10	T_1	40	90	10	T	1	10PTP	398	7	226	369	1000	0.55497
Built	S40T90T10	T_3	40	90	10	T	3	BTOPA	589	146	35	230	1000	0.590238
Built	S40T90T10	T_3	40	90	10	T	3	EETOD	589	146	35	230	1000	0.590238
Built	S40T90T10	T_3	40	90	10	T	3	ETeSS	426	12	198	364	1000	0.592531
Built	S40T90T10	T_3	40	90	10	T	3	ETrSS	376	7	248	369	1000	0.517973
Built	S40T90T10	T_3	40	90	10	T	3	FC1	618	335	6	41	1000	0.120354
Built	S40T90T10	T_3	40	90	10	T	3	FC5	594	184	30	192	1000	0.503545
Built	S40T90T10	T_3	40	90	10	T	3	FC10	589	146	35	230	1000	0.590238
Built	S40T90T10	T_3	40	90	10	T	3	MTeSPS	437	15	187	361	1000	0.605395
Built	S40T90T10	T_3	40	90	10	T	3	MTP	589	146	35	230	1000	0.590238
Built	S40T90T10	T_3	40	90	10	T	3	MTrSPS	417	12	207	364	1000	0.5769
Built	S40T90T10	T_3	40	90	10	T	3	10PTP	404	10	220	366	1000	0.558819
Built	S40T90T10	T_5	40	90	10	T	5	BTOPA	560	200	64	176	1000	0.393828
Built	S40T90T10	T_5	40	90	10	T	5	EETOD	560	200	64	176	1000	0.393828
Built	S40T90T10	T_5	40	90	10	T	5	ETeSS	450	29	174	347	1000	0.598185
Built	S40T90T10	T_5	40	90	10	T	5	ETrSS	420	21	204	355	1000	0.562794
Built	S40T90T10	T_5	40	90	10	T	5	FC1	624	376	0	0	1000	0
Built	S40T90T10	T_5	40	90	10	T	5	FC5	615	325	9	51	1000	0.145518
Built	S40T90T10	T_5	40	90	10	T	5	FC10	560	200	64	176	1000	0.393828
Built	S40T90T10	T_5	40	90	10	T	5	MTeSPS	475	36	149	340	1000	0.62797
Built	S40T90T10	T_5	40	90	10	T	5	MTP	594	285	30	91	1000	0.224153
Built	S40T90T10	T_5	40	90	10	T	5	MTrSPS	441	28	183	348	1000	0.58439
Built	S40T90T10	T_5	40	90	10	T	5	10PTP	428	24	196	352	1000	0.570232
Built	S40T90T10	T_025	40	90	10	T	0.25	BTOPA	460	18	164	358	1000	0.639929
Built	S40T90T10	T_025	40	90	10	T	0.25	EETOD	292	6	332	370	1000	0.385562
Built	S40T90T10	T_025	40	90	10	T	0.25	ETeSS	395	8	229	368	1000	0.547758
Built	S40T90T10	T_025	40	90	10	T	0.25	ETrSS	159	4	465	372	1000	0.196334
Built	S40T90T10	T_025	40	90	10	T	0.25	FC1	561	56	63	320	1000	0.747337
Built	S40T90T10	T_025	40	90	10	T	0.25	FC5	421	12	203	364	1000	0.58383
Built	S40T90T10	T_025	40	90	10	T	0.25	FC10	329	7	295	369	1000	0.441436
Built	S40T90T10	T_025	40	90	10	T	0.25	MTeSPS	397	9	227	367	1000	0.549026
Built	S40T90T10	T_025	40	90	10	T	0.25	MTP	210	4	414	372	1000	0.267859
Built	S40T90T10	T_025	40	90	10	T	0.25	MTrSPS	193	4	431	372	1000	0.243668
Built	S40T90T10	T_025	40	90	10	T	0.25	10PTP	125	3	499	373	1000	0.152394
Built	S40T90T10	TQ_1	40	90	10	TQ	1	BTOPA	491	11	133	365	1000	0.711714
Built	S40T90T10	TQ_1	40	90	10	TQ	1	EETOD	432	6	192	370	1000	0.615814
Built	S40T90T10	TQ_1	40	90	10	TQ	1	ETeSS	360	4	264	372	1000	0.497872
Built	S40T90T10	TQ_1	40	90	10	TQ	1	ETrSS	292	4	332	372	1000	0.389748
Built	S40T90T10	TQ_1	40	90	10	TQ	1	FC1	524	11	100	365	1000	0.774078
Built	S40T90T10	TQ_1	40	90	10	TQ	1	FC5	454	7	170	369	1000	0.652718
Built	S40T90T10	TQ_1	40	90	10	TQ	1	FC10	409	6	215	370	1000	0.575881
Built	S40T90T10	TQ_1	40	90	10	TQ	1	MTeSPS	254	3	370	373	1000	0.334242
Built	S40T90T10	TQ_1	40	90	10	TQ	1	MTP	452	6	172	370	1000	0.651265
Built	S40T90T10	TQ_1	40	90	10	TQ	1	MTrSPS	401	6	223	370	1000	0.562195
Built	S40T90T10	TQ_1	40	90	10	TQ	1	10PTP	341	4	283	372	1000	0.466979
Built	S40T90T10	TQ_3	40	90	10	TQ	3	BTOPA	482	9	142	367	1000	0.699342
Built	S40T90T10	TQ_3	40	90	10	TQ	3	EETOD	435	7	189	369	1000	0.618962
Built	S40T90T10	TQ_3	40	90	10	TQ	3	ETeSS	294	4	330	372	1000	0.392833
Built	S40T90T10	TQ_3	40	90	10	TQ	3	ETrSS	316	5	308	371	1000	0.425047
Built	S40T90T10	TQ_3	40	90	10	TQ	3	FC1	499	10	125	366	1000	0.728789
Built	S40T90T10	TQ_3	40	90	10	TQ	3	FC5	435	7	189	369	1000	0.618962
Built	S40T90T10	TQ_3	40	90	10	TQ	3	FC10	393	6	231	370	1000	0.548613
Built	S40T90T10	TQ_3	40	90	10	TQ	3	MTeSPS	294	4	330	372	1000	0.392833
Built	S40T90T10	TQ_3	40	90	10	TQ	3	MTP	481	9	143	367	1000	0.6975
Built	S40T90T10	TQ_3	40	90	10	TQ	3	MTrSPS	367	6	257	370	1000	0.50517
Built	S40T90T10	TQ_3	40	90	10	TQ	3	10PTP	393	6	231	370	1000	0.548613
Built	S40T90T10	TQ_5	40	90	10	TQ	5	BTOPA	501	10	123	366	1000	0.732541
Built	S40T90T10	TQ_5	40	90	10	TQ	5	EETOD	454	9	170	367	1000	0.648452
Built	S40T90T10	TQ_5	40	90	10	TQ	5	ETeSS	336	5	288	371	1000	0.456836
Built	S40T90T10	TQ_5	40	90	10	TQ	5	ETrSS	317	5	307	371	1000	0.426622
Built	S40T90T10	TQ_5	40	90	10	TQ	5	FC1	517	10	107	366	1000	0.762824
Built	S40T90T10	TQ_5	40	90	10	TQ	5	FC5	449	9	175	367	1000	0.63951
Built	S40T90T10	TQ_5	40	90	10	TQ	5	FC10	417	6	207	370	1000	0.589671
Built	S40T90T10	TQ_5	40	90	10	TQ	5	MTeSPS	336	5	288	371	1000	0.456836
Built	S40T90T10	TQ_5	40	90	10	TQ	5	MTP	484	10	140	366	1000	0.70089
Built	S40T90T10	TQ_5	40	90	10	TQ	5	MTrSPS	385	6	239	370	1000	0.535133
Built	S40T90T10	TQ_5	40	90	10	TQ	5	10PTP	385	6	239	370	1000	0.535133
Built	S40T90T10	TQ_025	40	90	10	TQ	0.25	BTOPA	453	11	171	365	1000	0.642386
Built	S40T90T10	TQ_025	40	90	10	TQ	0.25	EETOD	287	5	337	371	1000	0.379968
Built	S40T90T10	TQ_025	40	90	10	TQ	0.25	ETeSS	402	10	222	366	1000	0.555406
Built	S40T90T10	TQ_025	40	90	10	TQ	0.25	ETrSS	166	2	458	374	1000	0.210078
Built	S40T90T10	TQ_025	40	90	10	TQ	0.25	FC1	530	24	94	352	1000	0.757505
Built	S40T90T10	TQ_025	40	90	10	TQ	0.25	FC5	406	10	218	366	1000	0.562239
Built	S40T90T10	TQ_025	40	90	10	TQ	0.25	FC10	333	6	291	370	1000	0.449927
Built	S40T90T10	TQ_025	40	90	10	TQ	0.25	MTeSPS	402	10	222	366	1000	0.555406
Built	S40T90T10	TQ_025	40	90	10	TQ	0.25	MTP	198	4	426	372	1000	0.250746
Built	S40T90T10	TQ_025	40	90	10	TQ	0.25	MTrSPS	176	3	448	373	1000	0.221888
Built	S40T90T10	TQ_025	40	90	10	TQ	0.25	10PTP	130	2	494	374	1000	0.161119
Built	S60T50T50	Auto	60	50	50	Auto	1	BTOPA	600	61	24	315	1000	0.815246
Built	S60T50T50	Auto	60	50	50	Auto	1	EETOD	527	17	97	359	1000	0.766913
Built	S60T50T50	Auto	60	50	50	Auto	1	ETeSS	453	7	171	369	1000	0.650926
Built	S60T50T50	Auto	60	50	50	Auto	1	ETrSS	431	7	193	369	1000	0.611934
Built	S60T50T50	Auto	60	50	50	Auto	1	FC1	611	87	13	289	1000	0.778219
Built	S60T50T50	Auto	60	50	50	Auto	1	FC5	573	30	51	346	1000	0.829278
Built	S60T50T50	Auto	60	50	50	Auto	1	FC10	529	17	95	359	1000	0.77077
Built	S60T50T50	Auto	60	50	50	Auto	1	MTeSPS	417	6	207	370	1000	0.589671
Built	S60T50T50	Auto	60	50	50	Auto	1	MTP	595	50	29	326	1000	0.829756
Built	S60T50T50	Auto	60	50	50	Auto	1	MTrSPS	365	5	259	371	1000	0.503983
Built	S60T50T50	Auto	60	50	50	Auto	1	10PTP	496	11	128	365	1000	0.721031
Built	S60T50T50	H_1	60	50	50	H	1	BTOPA	617	118	7	258	1000	0.717015
Built	S60T50T50	H_1	60	50	50	H	1	EETOD	582	34	42	342	1000	0.838721
Built	S60T50T50	H_1	60	50	50	H	1	ETeSS	476	11	148	365	1000	0.684037
Built	S60T50T50	H_1	60	50	50	H	1	ETrSS	473	11	151	365	1000	0.678551
Built	S60T50T50	H_1	60	50	50	H	1	FC1	622	227	2	149	1000	0.446121
Built	S60T50T50	H_1	60	50	50	H	1	FC5	615	91	9	285	1000	0.777239
Built	S60T50T50	H_1	60	50	50	H	1	FC10	588	43	36	333	1000	0.83102
Built	S60T50T50	H_1	60	50	50	H	1	MTeSPS	491	12	133	364	1000	0.709568
Built	S60T50T50	H_1	60	50	50	H	1	MTP	616	115	8	261	1000	0.722167
Built	S60T50T50	H_1	60	50	50	H	1	MTrSPS	416	10	208	366	1000	0.579436
Built	S60T50T50	H_1	60	50	50	H	1	10PTP	540	21	84	355	1000	0.783448
Built	S60T50T50	H_3	60	50	50	H	3	BTOPA	623	175	1	201	1000	0.586948
Built	S60T50T50	H_3	60	50	50	H	3	EETOD	621	149	3	227	1000	0.648993
Built	S60T50T50	H_3	60	50	50	H	3	ETeSS	488	14	136	362	1000	0.699702
Built	S60T50T50	H_3	60	50	50	H	3	ETrSS	432	10	192	366	1000	0.607297
Built	S60T50T50	H_3	60	50	50	H	3	FC1	624	279	0	97	1000	0.302598
Built	S60T50T50	H_3	60	50	50	H	3	FC5	623	192	1	184	1000	0.542524
Built	S60T50T50	H_3	60	50	50	H	3	FC10	618	131	6	245	1000	0.687392
Built	S60T50T50	H_3	60	50	50	H	3	MTeSPS	433	10	191	366	1000	0.609053
Built	S60T50T50	H_3	60	50	50	H	3	MTP	622	159	2	217	1000	0.625853
Built	S60T50T50	H_3	60	50	50	H	3	MTrSPS	447	11	177	365	1000	0.631673
Built	S60T50T50	H_3	60	50	50	H	3	10PTP	501	15	123	361	1000	0.721792
Built	S60T50T50	H_5	60	50	50	H	5	BTOPA	624	228	0	148	1000	0.447546
Built	S60T50T50	H_5	60	50	50	H	5	EETOD	624	214	0	162	1000	0.485794
Built	S60T50T50	H_5	60	50	50	H	5	ETeSS	463	12	161	364	1000	0.658238
Built	S60T50T50	H_5	60	50	50	H	5	ETrSS	476	14	148	362	1000	0.677599
Built	S60T50T50	H_5	60	50	50	H	5	FC1	624	345	0	31	1000	0.100832
Built	S60T50T50	H_5	60	50	50	H	5	FC5	624	262	0	114	1000	0.351921
Built	S60T50T50	H_5	60	50	50	H	5	FC10	624	205	0	171	1000	0.510048
Built	S60T50T50	H_5	60	50	50	H	5	MTeSPS	456	12	168	364	1000	0.645625
Built	S60T50T50	H_5	60	50	50	H	5	MTP	624	218	0	158	1000	0.474932
Built	S60T50T50	H_5	60	50	50	H	5	MTrSPS	481	15	143	361	1000	0.684626
Built	S60T50T50	H_5	60	50	50	H	5	10PTP	575	53	49	323	1000	0.78217
Built	S60T50T50	H_025	60	50	50	H	0.25	BTOPA	549	43	75	333	1000	0.752716
Built	S60T50T50	H_025	60	50	50	H	0.25	EETOD	451	19	173	357	1000	0.62163
Built	S60T50T50	H_025	60	50	50	H	0.25	ETeSS	467	23	157	353	1000	0.641777
Built	S60T50T50	H_025	60	50	50	H	0.25	ETrSS	392	14	232	362	1000	0.529917
Built	S60T50T50	H_025	60	50	50	H	0.25	FC1	597	82	27	294	1000	0.760759
Built	S60T50T50	H_025	60	50	50	H	0.25	FC5	539	41	85	335	1000	0.737587
Built	S60T50T50	H_025	60	50	50	H	0.25	FC10	490	27	134	349	1000	0.675262
Built	S60T50T50	H_025	60	50	50	H	0.25	MTeSPS	457	20	167	356	1000	0.630218
Built	S60T50T50	H_025	60	50	50	H	0.25	MTP	520	33	104	343	1000	0.718603
Built	S60T50T50	H_025	60	50	50	H	0.25	MTrSPS	386	13	238	363	1000	0.521948
Built	S60T50T50	H_025	60	50	50	H	0.25	10PTP	417	15	207	361	1000	0.570487
Built	S60T50T50	L_1	60	50	50	L	1	BTOPA	615	120	9	256	1000	0.70796
Built	S60T50T50	L_1	60	50	50	L	1	EETOD	582	50	42	326	1000	0.803109
Built	S60T50T50	L_1	60	50	50	L	1	ETeSS	471	12	153	364	1000	0.672759
Built	S60T50T50	L_1	60	50	50	L	1	ETrSS	442	10	182	366	1000	0.62493
Built	S60T50T50	L_1	60	50	50	L	1	FC1	620	140	4	236	1000	0.669361
Built	S60T50T50	L_1	60	50	50	L	1	FC5	601	75	23	301	1000	0.785253
Built	S60T50T50	L_1	60	50	50	L	1	FC10	569	36	55	340	1000	0.808001
Built	S60T50T50	L_1	60	50	50	L	1	MTeSPS	463	12	161	364	1000	0.658238
Built	S60T50T50	L_1	60	50	50	L	1	MTP	621	157	3	219	1000	0.628819
Built	S60T50T50	L_1	60	50	50	L	1	MTrSPS	479	12	145	364	1000	0.687395
Built	S60T50T50	L_1	60	50	50	L	1	10PTP	485	15	139	361	1000	0.692
Built	S60T50T50	L_3	60	50	50	L	3	BTOPA	615	115	9	261	1000	0.720065
Built	S60T50T50	L_3	60	50	50	L	3	EETOD	600	61	24	315	1000	0.815246
Built	S60T50T50	L_3	60	50	50	L	3	ETeSS	471	11	153	365	1000	0.674902
Built	S60T50T50	L_3	60	50	50	L	3	ETrSS	465	11	159	365	1000	0.664
Built	S60T50T50	L_3	60	50	50	L	3	FC1	621	166	3	210	1000	0.605899
Built	S60T50T50	L_3	60	50	50	L	3	FC5	610	100	14	276	1000	0.74549
Built	S60T50T50	L_3	60	50	50	L	3	FC10	597	59	27	317	1000	0.813575
Built	S60T50T50	L_3	60	50	50	L	3	MTeSPS	471	11	153	365	1000	0.674902
Built	S60T50T50	L_3	60	50	50	L	3	MTP	616	121	8	255	1000	0.707631
Built	S60T50T50	L_3	60	50	50	L	3	MTrSPS	464	10	160	366	1000	0.664329
Built	S60T50T50	L_3	60	50	50	L	3	10PTP	534	24	90	352	1000	0.765247
Built	S60T50T50	L_5	60	50	50	L	5	BTOPA	622	178	2	198	1000	0.577068
Built	S60T50T50	L_5	60	50	50	L	5	EETOD	611	102	13	274	1000	0.742831
Built	S60T50T50	L_5	60	50	50	L	5	ETeSS	464	11	160	365	1000	0.662189
Built	S60T50T50	L_5	60	50	50	L	5	ETrSS	479	11	145	365	1000	0.68954
Built	S60T50T50	L_5	60	50	50	L	5	FC1	624	210	0	166	1000	0.496606
Built	S60T50T50	L_5	60	50	50	L	5	FC5	619	127	5	249	1000	0.699311
Built	S60T50T50	L_5	60	50	50	L	5	FC10	608	84	16	292	1000	0.778949
Built	S60T50T50	L_5	60	50	50	L	5	MTeSPS	487	11	137	365	1000	0.704293
Built	S60T50T50	L_5	60	50	50	L	5	MTP	622	178	2	198	1000	0.577068
Built	S60T50T50	L_5	60	50	50	L	5	MTrSPS	487	11	137	365	1000	0.704293
Built	S60T50T50	L_5	60	50	50	L	5	10PTP	585	42	39	334	1000	0.827109
Built	S60T50T50	L_025	60	50	50	L	0.25	BTOPA	622	171	2	205	1000	0.595166
Built	S60T50T50	L_025	60	50	50	L	0.25	EETOD	608	82	16	294	1000	0.783607
Built	S60T50T50	L_025	60	50	50	L	0.25	ETeSS	458	11	166	365	1000	0.651361
Built	S60T50T50	L_025	60	50	50	L	0.25	ETrSS	475	11	149	365	1000	0.682207
Built	S60T50T50	L_025	60	50	50	L	0.25	FC1	623	180	1	196	1000	0.573973
Built	S60T50T50	L_025	60	50	50	L	0.25	FC5	611	105	13	271	1000	0.735682
Built	S60T50T50	L_025	60	50	50	L	0.25	FC10	600	64	24	312	1000	0.808416
Built	S60T50T50	L_025	60	50	50	L	0.25	MTeSPS	488	11	136	365	1000	0.706146
Built	S60T50T50	L_025	60	50	50	L	0.25	MTP	624	191	0	185	1000	0.547265
Built	S60T50T50	L_025	60	50	50	L	0.25	MTrSPS	484	11	140	365	1000	0.698747
Built	S60T50T50	L_025	60	50	50	L	0.25	10PTP	594	49	30	327	1000	0.829938
Built	S60T50T50	LQ_1	60	50	50	LQ	1	BTOPA	612	162	12	214	1000	0.597267
Built	S60T50T50	LQ_1	60	50	50	LQ	1	EETOD	589	40	35	336	1000	0.839746
Built	S60T50T50	LQ_1	60	50	50	LQ	1	ETeSS	423	8	201	368	1000	0.595832
Built	S60T50T50	LQ_1	60	50	50	LQ	1	ETrSS	439	9	185	367	1000	0.621756
Built	S60T50T50	LQ_1	60	50	50	LQ	1	FC1	613	175	11	201	1000	0.566005
Built	S60T50T50	LQ_1	60	50	50	LQ	1	FC5	598	49	26	327	1000	0.838203
Built	S60T50T50	LQ_1	60	50	50	LQ	1	FC10	565	20	59	356	1000	0.835046
Built	S60T50T50	LQ_1	60	50	50	LQ	1	MTeSPS	415	7	209	369	1000	0.584091
Built	S60T50T50	LQ_1	60	50	50	LQ	1	MTP	612	162	12	214	1000	0.597267
Built	S60T50T50	LQ_1	60	50	50	LQ	1	MTrSPS	449	9	175	367	1000	0.63951
Built	S60T50T50	LQ_1	60	50	50	LQ	1	10PTP	529	13	95	363	1000	0.779405
Built	S60T50T50	LQ_3	60	50	50	LQ	3	BTOPA	614	140	10	236	1000	0.656757
Built	S60T50T50	LQ_3	60	50	50	LQ	3	EETOD	599	44	25	332	1000	0.851465
Built	S60T50T50	LQ_3	60	50	50	LQ	3	ETeSS	435	9	189	367	1000	0.614702
Built	S60T50T50	LQ_3	60	50	50	LQ	3	ETrSS	430	8	194	368	1000	0.608053
Built	S60T50T50	LQ_3	60	50	50	LQ	3	FC1	617	158	7	218	1000	0.617879
Built	S60T50T50	LQ_3	60	50	50	LQ	3	FC5	599	48	25	328	1000	0.842518
Built	S60T50T50	LQ_3	60	50	50	LQ	3	FC10	567	19	57	357	1000	0.841227
Built	S60T50T50	LQ_3	60	50	50	LQ	3	MTeSPS	474	9	150	367	1000	0.684659
Built	S60T50T50	LQ_3	60	50	50	LQ	3	MTP	614	140	10	236	1000	0.656757
Built	S60T50T50	LQ_3	60	50	50	LQ	3	MTrSPS	447	9	177	367	1000	0.635945
Built	S60T50T50	LQ_3	60	50	50	LQ	3	10PTP	536	14	88	362	1000	0.790812
Built	S60T50T50	LQ_5	60	50	50	LQ	5	BTOPA	619	168	5	208	1000	0.596571
Built	S60T50T50	LQ_5	60	50	50	LQ	5	EETOD	608	48	16	328	1000	0.861265
Built	S60T50T50	LQ_5	60	50	50	LQ	5	ETeSS	445	8	179	368	1000	0.63452
Built	S60T50T50	LQ_5	60	50	50	LQ	5	ETrSS	423	8	201	368	1000	0.595832
Built	S60T50T50	LQ_5	60	50	50	LQ	5	FC1	619	176	5	200	1000	0.575954
Built	S60T50T50	LQ_5	60	50	50	LQ	5	FC5	609	50	15	326	1000	0.85887
Built	S60T50T50	LQ_5	60	50	50	LQ	5	FC10	576	25	48	351	1000	0.8463
Built	S60T50T50	LQ_5	60	50	50	LQ	5	MTeSPS	466	8	158	368	1000	0.672227
Built	S60T50T50	LQ_5	60	50	50	LQ	5	MTP	619	168	5	208	1000	0.596571
Built	S60T50T50	LQ_5	60	50	50	LQ	5	MTrSPS	428	8	196	368	1000	0.604553
Built	S60T50T50	LQ_5	60	50	50	LQ	5	10PTP	504	11	120	365	1000	0.736036
Built	S60T50T50	LQ_025	60	50	50	LQ	0.25	BTOPA	595	89	29	287	1000	0.740299
Built	S60T50T50	LQ_025	60	50	50	LQ	0.25	EETOD	530	16	94	360	1000	0.774863
Built	S60T50T50	LQ_025	60	50	50	LQ	0.25	ETeSS	427	8	197	368	1000	0.602806
Built	S60T50T50	LQ_025	60	50	50	LQ	0.25	ETrSS	399	7	225	369	1000	0.55667
Built	S60T50T50	LQ_025	60	50	50	LQ	0.25	FC1	598	103	26	273	1000	0.71343
Built	S60T50T50	LQ_025	60	50	50	LQ	0.25	FC5	552	21	72	355	1000	0.807012
Built	S60T50T50	LQ_025	60	50	50	LQ	0.25	FC10	501	10	123	366	1000	0.732541
Built	S60T50T50	LQ_025	60	50	50	LQ	0.25	MTeSPS	422	7	202	369	1000	0.59622
Built	S60T50T50	LQ_025	60	50	50	LQ	0.25	MTP	595	89	29	287	1000	0.740299
Built	S60T50T50	LQ_025	60	50	50	LQ	0.25	MTrSPS	365	5	259	371	1000	0.503983
Built	S60T50T50	LQ_025	60	50	50	LQ	0.25	10PTP	454	9	170	367	1000	0.648452
Built	S60T50T50	LQP_1	60	50	50	LQP	1	BTOPA	600	68	24	308	1000	0.799274
Built	S60T50T50	LQP_1	60	50	50	LQP	1	EETOD	569	27	55	349	1000	0.827801
Built	S60T50T50	LQP_1	60	50	50	LQP	1	ETeSS	432	9	192	367	1000	0.60943
Built	S60T50T50	LQP_1	60	50	50	LQP	1	ETrSS	437	9	187	367	1000	0.618225
Built	S60T50T50	LQP_1	60	50	50	LQP	1	FC1	603	97	21	279	1000	0.738011
Built	S60T50T50	LQP_1	60	50	50	LQP	1	FC5	574	36	50	340	1000	0.818074
Built	S60T50T50	LQP_1	60	50	50	LQP	1	FC10	539	15	85	361	1000	0.794496
Built	S60T50T50	LQP_1	60	50	50	LQP	1	MTeSPS	409	8	215	368	1000	0.571635
Built	S60T50T50	LQP_1	60	50	50	LQP	1	MTP	598	66	26	310	1000	0.799707
Built	S60T50T50	LQP_1	60	50	50	LQP	1	MTrSPS	460	9	164	367	1000	0.65924
Built	S60T50T50	LQP_1	60	50	50	LQP	1	10PTP	517	14	107	362	1000	0.754221
Built	S60T50T50	LQP_3	60	50	50	LQP	3	BTOPA	612	106	12	270	1000	0.735388
Built	S60T50T50	LQP_3	60	50	50	LQP	3	EETOD	603	49	21	327	1000	0.848584
Built	S60T50T50	LQP_3	60	50	50	LQP	3	ETeSS	441	8	183	368	1000	0.627425
Built	S60T50T50	LQP_3	60	50	50	LQP	3	ETrSS	422	8	202	368	1000	0.594093
Built	S60T50T50	LQP_3	60	50	50	LQP	3	FC1	618	168	6	208	1000	0.594474
Built	S60T50T50	LQP_3	60	50	50	LQP	3	FC5	601	47	23	329	1000	0.848909
Built	S60T50T50	LQP_3	60	50	50	LQP	3	FC10	566	22	58	354	1000	0.832698
Built	S60T50T50	LQP_3	60	50	50	LQP	3	MTeSPS	441	8	183	368	1000	0.627425
Built	S60T50T50	LQP_3	60	50	50	LQP	3	MTP	610	59	14	317	1000	0.840642
Built	S60T50T50	LQP_3	60	50	50	LQP	3	MTrSPS	422	8	202	368	1000	0.594093
Built	S60T50T50	LQP_3	60	50	50	LQP	3	10PTP	500	11	124	365	1000	0.728519
Built	S60T50T50	LQP_5	60	50	50	LQP	5	BTOPA	619	154	5	222	1000	0.632196
Built	S60T50T50	LQP_5	60	50	50	LQP	5	EETOD	617	107	7	269	1000	0.743502
Built	S60T50T50	LQP_5	60	50	50	LQP	5	ETeSS	459	9	165	367	1000	0.657437
Built	S60T50T50	LQP_5	60	50	50	LQP	5	ETrSS	440	8	184	368	1000	0.625655
Built	S60T50T50	LQP_5	60	50	50	LQP	5	FC1	621	243	3	133	1000	0.399602
Built	S60T50T50	LQP_5	60	50	50	LQP	5	FC5	618	109	6	267	1000	0.740818
Built	S60T50T50	LQP_5	60	50	50	LQP	5	FC10	609	54	15	322	1000	0.849862
Built	S60T50T50	LQP_5	60	50	50	LQP	5	MTeSPS	483	10	141	366	1000	0.699045
Built	S60T50T50	LQP_5	60	50	50	LQP	5	MTP	619	152	5	224	1000	0.637239
Built	S60T50T50	LQP_5	60	50	50	LQP	5	MTrSPS	451	9	173	367	1000	0.643081
Built	S60T50T50	LQP_5	60	50	50	LQP	5	10PTP	499	11	125	365	1000	0.726644
Built	S60T50T50	LQP_025	60	50	50	LQP	0.25	BTOPA	581	49	43	327	1000	0.803318
Built	S60T50T50	LQP_025	60	50	50	LQP	0.25	EETOD	536	20	88	356	1000	0.777829
Built	S60T50T50	LQP_025	60	50	50	LQP	0.25	ETeSS	450	9	174	367	1000	0.641295
Built	S60T50T50	LQP_025	60	50	50	LQP	0.25	ETrSS	414	8	210	368	1000	0.58024
Built	S60T50T50	LQP_025	60	50	50	LQP	0.25	FC1	591	68	33	308	1000	0.780706
Built	S60T50T50	LQP_025	60	50	50	LQP	0.25	FC5	545	23	79	353	1000	0.788879
Built	S60T50T50	LQP_025	60	50	50	LQP	0.25	FC10	499	11	125	365	1000	0.726644
Built	S60T50T50	LQP_025	60	50	50	LQP	0.25	MTeSPS	464	9	160	367	1000	0.666467
Built	S60T50T50	LQP_025	60	50	50	LQP	0.25	MTP	573	40	51	336	1000	0.807194
Built	S60T50T50	LQP_025	60	50	50	LQP	0.25	MTrSPS	406	8	218	368	1000	0.566492
Built	S60T50T50	LQP_025	60	50	50	LQP	0.25	10PTP	476	9	148	367	1000	0.688319
Built	S60T50T50	LQPT_1	60	50	50	LQPT	1	BTOPA	587	72	37	304	1000	0.763336
Built	S60T50T50	LQPT_1	60	50	50	LQPT	1	EETOD	547	22	77	354	1000	0.794984
Built	S60T50T50	LQPT_1	60	50	50	LQPT	1	ETeSS	463	11	161	365	1000	0.66038
Built	S60T50T50	LQPT_1	60	50	50	LQPT	1	ETrSS	418	8	206	368	1000	0.587153
Built	S60T50T50	LQPT_1	60	50	50	LQPT	1	FC1	606	148	18	228	1000	0.620144
Built	S60T50T50	LQPT_1	60	50	50	LQPT	1	FC5	576	51	48	325	1000	0.788689
Built	S60T50T50	LQPT_1	60	50	50	LQPT	1	FC10	546	22	78	354	1000	0.793019
Built	S60T50T50	LQPT_1	60	50	50	LQPT	1	MTeSPS	445	9	179	367	1000	0.632387
Built	S60T50T50	LQPT_1	60	50	50	LQPT	1	MTP	574	47	50	329	1000	0.793614
Built	S60T50T50	LQPT_1	60	50	50	LQPT	1	MTrSPS	376	4	248	372	1000	0.524313
Built	S60T50T50	LQPT_1	60	50	50	LQPT	1	10PTP	468	11	156	365	1000	0.669443
Built	S60T50T50	LQPT_3	60	50	50	LQPT	3	BTOPA	619	127	5	249	1000	0.699311
Built	S60T50T50	LQPT_3	60	50	50	LQPT	3	EETOD	613	80	11	296	1000	0.798733
Built	S60T50T50	LQPT_3	60	50	50	LQPT	3	ETeSS	424	7	200	369	1000	0.5997
Built	S60T50T50	LQPT_3	60	50	50	LQPT	3	ETrSS	447	9	177	367	1000	0.635945
Built	S60T50T50	LQPT_3	60	50	50	LQPT	3	FC1	620	212	4	164	1000	0.482838
Built	S60T50T50	LQPT_3	60	50	50	LQPT	3	FC5	613	80	11	296	1000	0.798733
Built	S60T50T50	LQPT_3	60	50	50	LQPT	3	FC10	596	37	28	339	1000	0.860818
Built	S60T50T50	LQPT_3	60	50	50	LQPT	3	MTeSPS	439	8	185	368	1000	0.623887
Built	S60T50T50	LQPT_3	60	50	50	LQPT	3	MTP	619	125	5	251	1000	0.704201
Built	S60T50T50	LQPT_3	60	50	50	LQPT	3	MTrSPS	453	9	171	367	1000	0.64666
Built	S60T50T50	LQPT_3	60	50	50	LQPT	3	10PTP	556	17	68	359	1000	0.823613
Built	S60T50T50	LQPT_5	60	50	50	LQPT	5	BTOPA	619	186	5	190	1000	0.54991
Built	S60T50T50	LQPT_5	60	50	50	LQPT	5	EETOD	619	137	5	239	1000	0.674694
Built	S60T50T50	LQPT_5	60	50	50	LQPT	5	ETeSS	428	8	196	368	1000	0.604553
Built	S60T50T50	LQPT_5	60	50	50	LQPT	5	ETrSS	435	8	189	368	1000	0.616833
Built	S60T50T50	LQPT_5	60	50	50	LQPT	5	FC1	620	259	4	117	1000	0.35223
Built	S60T50T50	LQPT_5	60	50	50	LQPT	5	FC5	617	118	7	258	1000	0.717015
Built	S60T50T50	LQPT_5	60	50	50	LQPT	5	FC10	610	52	14	324	1000	0.856467
Built	S60T50T50	LQPT_5	60	50	50	LQPT	5	MTeSPS	452	8	172	368	1000	0.647003
Built	S60T50T50	LQPT_5	60	50	50	LQPT	5	MTP	618	127	6	249	1000	0.697204
Built	S60T50T50	LQPT_5	60	50	50	LQPT	5	MTrSPS	394	7	230	369	1000	0.548186
Built	S60T50T50	LQPT_5	60	50	50	LQPT	5	10PTP	510	13	114	363	1000	0.743069
Built	S60T50T50	LQPT_025	60	50	50	LQPT	0.25	BTOPA	496	39	128	337	1000	0.660099
Built	S60T50T50	LQPT_025	60	50	50	LQPT	0.25	EETOD	338	15	286	361	1000	0.43891
Built	S60T50T50	LQPT_025	60	50	50	LQPT	0.25	ETeSS	504	39	120	337	1000	0.67507
Built	S60T50T50	LQPT_025	60	50	50	LQPT	0.25	ETrSS	235	8	389	368	1000	0.29577
Built	S60T50T50	LQPT_025	60	50	50	LQPT	0.25	FC1	583	91	41	285	1000	0.711064
Built	S60T50T50	LQPT_025	60	50	50	LQPT	0.25	FC5	492	39	132	337	1000	0.652659
Built	S60T50T50	LQPT_025	60	50	50	LQPT	0.25	FC10	410	26	214	350	1000	0.534768
Built	S60T50T50	LQPT_025	60	50	50	LQPT	0.25	MTeSPS	541	51	83	325	1000	0.719186
Built	S60T50T50	LQPT_025	60	50	50	LQPT	0.25	MTP	308	13	316	363	1000	0.395656
Built	S60T50T50	LQPT_025	60	50	50	LQPT	0.25	MTrSPS	257	10	367	366	1000	0.324111
Built	S60T50T50	LQPT_025	60	50	50	LQPT	0.25	10PTP	169	4	455	372	1000	0.210113
Built	S60T50T50	LQPTH_1	60	50	50	LQPTH	1	BTOPA	590	75	34	301	1000	0.762569
Built	S60T50T50	LQPTH_1	60	50	50	LQPTH	1	EETOD	525	24	99	352	1000	0.747872
Built	S60T50T50	LQPTH_1	60	50	50	LQPTH	1	ETeSS	461	14	163	362	1000	0.650336
Built	S60T50T50	LQPTH_1	60	50	50	LQPTH	1	ETrSS	436	9	188	367	1000	0.616463
Built	S60T50T50	LQPTH_1	60	50	50	LQPTH	1	FC1	607	141	17	235	1000	0.639677
Built	S60T50T50	LQPTH_1	60	50	50	LQPTH	1	FC5	574	53	50	323	1000	0.780151
Built	S60T50T50	LQPTH_1	60	50	50	LQPTH	1	FC10	536	26	88	350	1000	0.764766
Built	S60T50T50	LQPTH_1	60	50	50	LQPTH	1	MTeSPS	450	10	174	366	1000	0.639159
Built	S60T50T50	LQPTH_1	60	50	50	LQPTH	1	MTP	571	47	53	329	1000	0.787567
Built	S60T50T50	LQPTH_1	60	50	50	LQPTH	1	MTrSPS	453	12	171	364	1000	0.640245
Built	S60T50T50	LQPTH_1	60	50	50	LQPTH	1	10PTP	474	15	150	361	1000	0.671791
Built	S60T50T50	LQPTH_3	60	50	50	LQPTH	3	BTOPA	619	140	5	236	1000	0.667254
Built	S60T50T50	LQPTH_3	60	50	50	LQPTH	3	EETOD	614	73	10	303	1000	0.817029
Built	S60T50T50	LQPTH_3	60	50	50	LQPTH	3	ETeSS	412	7	212	369	1000	0.578917
Built	S60T50T50	LQPTH_3	60	50	50	LQPTH	3	ETrSS	432	9	192	367	1000	0.60943
Built	S60T50T50	LQPTH_3	60	50	50	LQPTH	3	FC1	620	203	4	173	1000	0.507021
Built	S60T50T50	LQPTH_3	60	50	50	LQPTH	3	FC5	615	83	9	293	1000	0.795962
Built	S60T50T50	LQPTH_3	60	50	50	LQPTH	3	FC10	602	45	22	331	1000	0.855461
Built	S60T50T50	LQPTH_3	60	50	50	LQPTH	3	MTeSPS	452	9	172	367	1000	0.64487
Built	S60T50T50	LQPTH_3	60	50	50	LQPTH	3	MTP	619	128	5	248	1000	0.696862
Built	S60T50T50	LQPTH_3	60	50	50	LQPTH	3	MTrSPS	380	5	244	371	1000	0.528873
Built	S60T50T50	LQPTH_3	60	50	50	LQPTH	3	10PTP	576	21	48	355	1000	0.855025
Built	S60T50T50	LQPTH_5	60	50	50	LQPTH	5	BTOPA	619	134	5	242	1000	0.682108
Built	S60T50T50	LQPTH_5	60	50	50	LQPTH	5	EETOD	619	120	5	256	1000	0.716378
Built	S60T50T50	LQPTH_5	60	50	50	LQPTH	5	ETeSS	433	7	191	369	1000	0.615444
Built	S60T50T50	LQPTH_5	60	50	50	LQPTH	5	ETrSS	436	7	188	369	1000	0.620723
Built	S60T50T50	LQPTH_5	60	50	50	LQPTH	5	FC1	621	241	3	135	1000	0.405203
Built	S60T50T50	LQPTH_5	60	50	50	LQPTH	5	FC5	618	111	6	265	1000	0.736016
Built	S60T50T50	LQPTH_5	60	50	50	LQPTH	5	FC10	610	58	14	318	1000	0.84291
Built	S60T50T50	LQPTH_5	60	50	50	LQPTH	5	MTeSPS	443	7	181	369	1000	0.633099
Built	S60T50T50	LQPTH_5	60	50	50	LQPTH	5	MTP	619	124	5	252	1000	0.706642
Built	S60T50T50	LQPTH_5	60	50	50	LQPTH	5	MTrSPS	435	7	189	369	1000	0.618962
Built	S60T50T50	LQPTH_5	60	50	50	LQPTH	5	10PTP	546	15	78	361	1000	0.808197
Built	S60T50T50	LQPTH_025	60	50	50	LQPTH	0.25	BTOPA	494	49	130	327	1000	0.634198
Built	S60T50T50	LQPTH_025	60	50	50	LQPTH	0.25	EETOD	311	15	313	361	1000	0.396117
Built	S60T50T50	LQPTH_025	60	50	50	LQPTH	0.25	ETeSS	491	48	133	328	1000	0.630859
Built	S60T50T50	LQPTH_025	60	50	50	LQPTH	0.25	ETrSS	242	9	382	367	1000	0.303963
Built	S60T50T50	LQPTH_025	60	50	50	LQPTH	0.25	FC1	585	101	39	275	1000	0.691543
Built	S60T50T50	LQPTH_025	60	50	50	LQPTH	0.25	FC5	494	49	130	327	1000	0.634198
Built	S60T50T50	LQPTH_025	60	50	50	LQPTH	0.25	FC10	420	27	204	349	1000	0.549834
Built	S60T50T50	LQPTH_025	60	50	50	LQPTH	0.25	MTeSPS	461	40	163	336	1000	0.593799
Built	S60T50T50	LQPTH_025	60	50	50	LQPTH	0.25	MTP	373	16	251	360	1000	0.493866
Built	S60T50T50	LQPTH_025	60	50	50	LQPTH	0.25	MTrSPS	214	8	410	368	1000	0.265306
Built	S60T50T50	LQPTH_025	60	50	50	LQPTH	0.25	10PTP	158	4	466	372	1000	0.194963
Built	S60T50T50	PT_1	60	50	50	PT	1	BTOPA	612	89	12	287	1000	0.775631
Built	S60T50T50	PT_1	60	50	50	PT	1	EETOD	588	44	36	332	1000	0.828791
Built	S60T50T50	PT_1	60	50	50	PT	1	ETeSS	435	11	189	365	1000	0.610434
Built	S60T50T50	PT_1	60	50	50	PT	1	ETrSS	432	11	192	365	1000	0.605163
Built	S60T50T50	PT_1	60	50	50	PT	1	FC1	621	198	3	178	1000	0.522438
Built	S60T50T50	PT_1	60	50	50	PT	1	FC5	611	69	13	307	1000	0.819923
Built	S60T50T50	PT_1	60	50	50	PT	1	FC10	582	40	42	336	1000	0.825437
Built	S60T50T50	PT_1	60	50	50	PT	1	MTeSPS	430	11	194	365	1000	0.601657
Built	S60T50T50	PT_1	60	50	50	PT	1	MTP	612	83	12	293	1000	0.789655
Built	S60T50T50	PT_1	60	50	50	PT	1	MTrSPS	450	12	174	364	1000	0.634882
Built	S60T50T50	PT_1	60	50	50	PT	1	10PTP	488	14	136	362	1000	0.699702
Built	S60T50T50	PT_3	60	50	50	PT	3	BTOPA	624	198	0	178	1000	0.528733
Built	S60T50T50	PT_3	60	50	50	PT	3	EETOD	623	160	1	216	1000	0.625421
Built	S60T50T50	PT_3	60	50	50	PT	3	ETeSS	433	9	191	367	1000	0.611185
Built	S60T50T50	PT_3	60	50	50	PT	3	ETrSS	439	9	185	367	1000	0.621756
Built	S60T50T50	PT_3	60	50	50	PT	3	FC1	624	272	0	104	1000	0.323033
Built	S60T50T50	PT_3	60	50	50	PT	3	FC5	621	142	3	234	1000	0.666495
Built	S60T50T50	PT_3	60	50	50	PT	3	FC10	614	83	10	293	1000	0.793857
Built	S60T50T50	PT_3	60	50	50	PT	3	MTeSPS	426	9	198	367	1000	0.59893
Built	S60T50T50	PT_3	60	50	50	PT	3	MTP	623	188	1	188	1000	0.553056
Built	S60T50T50	PT_3	60	50	50	PT	3	MTrSPS	417	8	207	368	1000	0.585422
Built	S60T50T50	PT_3	60	50	50	PT	3	10PTP	555	15	69	361	1000	0.825957
Built	S60T50T50	PT_5	60	50	50	PT	5	BTOPA	624	221	0	155	1000	0.46675
Built	S60T50T50	PT_5	60	50	50	PT	5	EETOD	624	206	0	170	1000	0.507366
Built	S60T50T50	PT_5	60	50	50	PT	5	ETeSS	456	9	168	367	1000	0.652041
Built	S60T50T50	PT_5	60	50	50	PT	5	ETrSS	442	9	182	367	1000	0.627064
Built	S60T50T50	PT_5	60	50	50	PT	5	FC1	624	288	0	88	1000	0.276062
Built	S60T50T50	PT_5	60	50	50	PT	5	FC5	624	188	0	188	1000	0.55516
Built	S60T50T50	PT_5	60	50	50	PT	5	FC10	621	119	3	257	1000	0.723029
Built	S60T50T50	PT_5	60	50	50	PT	5	MTeSPS	433	9	191	367	1000	0.611185
Built	S60T50T50	PT_5	60	50	50	PT	5	MTP	624	189	0	187	1000	0.552531
Built	S60T50T50	PT_5	60	50	50	PT	5	MTrSPS	440	9	184	367	1000	0.623523
Built	S60T50T50	PT_5	60	50	50	PT	5	10PTP	562	26	62	350	1000	0.815967
Built	S60T50T50	PT_025	60	50	50	PT	0.25	BTOPA	498	49	126	327	1000	0.641646
Built	S60T50T50	PT_025	60	50	50	PT	0.25	EETOD	344	15	280	361	1000	0.448565
Built	S60T50T50	PT_025	60	50	50	PT	0.25	ETeSS	468	38	156	338	1000	0.610842
Built	S60T50T50	PT_025	60	50	50	PT	0.25	ETrSS	256	10	368	366	1000	0.322619
Built	S60T50T50	PT_025	60	50	50	PT	0.25	FC1	593	144	31	232	1000	0.603376
Built	S60T50T50	PT_025	60	50	50	PT	0.25	FC5	493	48	131	328	1000	0.634569
Built	S60T50T50	PT_025	60	50	50	PT	0.25	FC10	433	21	191	355	1000	0.585458
Built	S60T50T50	PT_025	60	50	50	PT	0.25	MTeSPS	468	38	156	338	1000	0.610842
Built	S60T50T50	PT_025	60	50	50	PT	0.25	MTP	402	18	222	358	1000	0.538319
Built	S60T50T50	PT_025	60	50	50	PT	0.25	MTrSPS	230	9	394	367	1000	0.286382
Built	S60T50T50	PT_025	60	50	50	PT	0.25	10PTP	186	5	438	371	1000	0.231746
Built	S60T50T50	Q_1	60	50	50	Q	1	BTOPA	609	61	15	315	1000	0.834003
Built	S60T50T50	Q_1	60	50	50	Q	1	EETOD	579	24	45	352	1000	0.85457
Built	S60T50T50	Q_1	60	50	50	Q	1	ETeSS	424	8	200	368	1000	0.597573
Built	S60T50T50	Q_1	60	50	50	Q	1	ETrSS	403	7	221	369	1000	0.563486
Built	S60T50T50	Q_1	60	50	50	Q	1	FC1	609	56	15	320	1000	0.845343
Built	S60T50T50	Q_1	60	50	50	Q	1	FC5	569	19	55	357	1000	0.845245
Built	S60T50T50	Q_1	60	50	50	Q	1	FC10	529	12	95	364	1000	0.781558
Built	S60T50T50	Q_1	60	50	50	Q	1	MTeSPS	450	9	174	367	1000	0.641295
Built	S60T50T50	Q_1	60	50	50	Q	1	MTP	609	61	15	315	1000	0.834003
Built	S60T50T50	Q_1	60	50	50	Q	1	MTrSPS	413	7	211	369	1000	0.58064
Built	S60T50T50	Q_1	60	50	50	Q	1	10PTP	475	9	149	367	1000	0.686488
Built	S60T50T50	Q_3	60	50	50	Q	3	BTOPA	617	88	7	288	1000	0.788494
Built	S60T50T50	Q_3	60	50	50	Q	3	EETOD	600	41	24	335	1000	0.860225
Built	S60T50T50	Q_3	60	50	50	Q	3	ETeSS	426	8	198	368	1000	0.60106
Built	S60T50T50	Q_3	60	50	50	Q	3	ETrSS	396	6	228	370	1000	0.553694
Built	S60T50T50	Q_3	60	50	50	Q	3	FC1	617	85	7	291	1000	0.795512
Built	S60T50T50	Q_3	60	50	50	Q	3	FC5	588	28	36	348	1000	0.864186
Built	S60T50T50	Q_3	60	50	50	Q	3	FC10	550	16	74	360	1000	0.813908
Built	S60T50T50	Q_3	60	50	50	Q	3	MTeSPS	438	8	186	368	1000	0.622121
Built	S60T50T50	Q_3	60	50	50	Q	3	MTP	617	88	7	288	1000	0.788494
Built	S60T50T50	Q_3	60	50	50	Q	3	MTrSPS	416	7	208	369	1000	0.585818
Built	S60T50T50	Q_3	60	50	50	Q	3	10PTP	496	11	128	365	1000	0.721031
Built	S60T50T50	Q_5	60	50	50	Q	5	BTOPA	612	67	12	309	1000	0.826605
Built	S60T50T50	Q_5	60	50	50	Q	5	EETOD	594	32	30	344	1000	0.867734
Built	S60T50T50	Q_5	60	50	50	Q	5	ETeSS	428	8	196	368	1000	0.604553
Built	S60T50T50	Q_5	60	50	50	Q	5	ETrSS	385	5	239	371	1000	0.537248
Built	S60T50T50	Q_5	60	50	50	Q	5	FC1	612	68	12	308	1000	0.824315
Built	S60T50T50	Q_5	60	50	50	Q	5	FC5	583	26	41	350	1000	0.858341
Built	S60T50T50	Q_5	60	50	50	Q	5	FC10	544	13	80	363	1000	0.808588
Built	S60T50T50	Q_5	60	50	50	Q	5	MTeSPS	474	9	150	367	1000	0.684659
Built	S60T50T50	Q_5	60	50	50	Q	5	MTP	611	63	13	313	1000	0.833643
Built	S60T50T50	Q_5	60	50	50	Q	5	MTrSPS	414	8	210	368	1000	0.58024
Built	S60T50T50	Q_5	60	50	50	Q	5	10PTP	425	8	199	368	1000	0.599316
Built	S60T50T50	Q_025	60	50	50	Q	0.25	BTOPA	585	46	39	330	1000	0.818186
Built	S60T50T50	Q_025	60	50	50	Q	0.25	EETOD	556	23	68	353	1000	0.810578
Built	S60T50T50	Q_025	60	50	50	Q	0.25	ETeSS	432	8	192	368	1000	0.61156
Built	S60T50T50	Q_025	60	50	50	Q	0.25	ETrSS	398	7	226	369	1000	0.55497
Built	S60T50T50	Q_025	60	50	50	Q	0.25	FC1	592	52	32	324	1000	0.819078
Built	S60T50T50	Q_025	60	50	50	Q	0.25	FC5	552	23	72	353	1000	0.802659
Built	S60T50T50	Q_025	60	50	50	Q	0.25	FC10	511	14	113	362	1000	0.742811
Built	S60T50T50	Q_025	60	50	50	Q	0.25	MTeSPS	490	10	134	366	1000	0.712
Built	S60T50T50	Q_025	60	50	50	Q	0.25	MTP	585	45	39	331	1000	0.820421
Built	S60T50T50	Q_025	60	50	50	Q	0.25	MTrSPS	411	7	213	369	1000	0.577196
Built	S60T50T50	Q_025	60	50	50	Q	0.25	10PTP	471	9	153	367	1000	0.679183
Built	S60T50T50	QH_1	60	50	50	QH	1	BTOPA	607	68	17	308	1000	0.813841
Built	S60T50T50	QH_1	60	50	50	QH	1	EETOD	527	21	97	355	1000	0.758244
Built	S60T50T50	QH_1	60	50	50	QH	1	ETeSS	471	10	153	366	1000	0.677044
Built	S60T50T50	QH_1	60	50	50	QH	1	ETrSS	428	6	196	370	1000	0.608806
Built	S60T50T50	QH_1	60	50	50	QH	1	FC1	610	110	14	266	1000	0.721624
Built	S60T50T50	QH_1	60	50	50	QH	1	FC5	578	37	46	339	1000	0.823959
Built	S60T50T50	QH_1	60	50	50	QH	1	FC10	533	21	91	355	1000	0.769835
Built	S60T50T50	QH_1	60	50	50	QH	1	MTeSPS	439	7	185	369	1000	0.626017
Built	S60T50T50	QH_1	60	50	50	QH	1	MTP	607	63	17	313	1000	0.825266
Built	S60T50T50	QH_1	60	50	50	QH	1	MTrSPS	393	5	231	371	1000	0.550729
Built	S60T50T50	QH_1	60	50	50	QH	1	10PTP	469	9	155	367	1000	0.675541
Built	S60T50T50	QH_3	60	50	50	QH	3	BTOPA	613	62	11	314	1000	0.840123
Built	S60T50T50	QH_3	60	50	50	QH	3	EETOD	579	23	45	353	1000	0.856753
Built	S60T50T50	QH_3	60	50	50	QH	3	ETeSS	417	6	207	370	1000	0.589671
Built	S60T50T50	QH_3	60	50	50	QH	3	ETrSS	406	6	218	370	1000	0.570736
Built	S60T50T50	QH_3	60	50	50	QH	3	FC1	613	65	11	311	1000	0.833281
Built	S60T50T50	QH_3	60	50	50	QH	3	FC5	579	23	45	353	1000	0.856753
Built	S60T50T50	QH_3	60	50	50	QH	3	FC10	539	13	85	363	1000	0.798811
Built	S60T50T50	QH_3	60	50	50	QH	3	MTeSPS	417	6	207	370	1000	0.589671
[truncated: 4,469 more rows]
