# Supplementary material for: One-class land-cover classification using MaxEnt: the effect of modelling parameterization on classification accuracy
Source: PeerJ. 2019 May 27;7:e7016. doi: 10.7717/peerj.7016 (PMC6542344; doi:10.7717/peerj.7016)
Supplement: Supplemental Information 3 [file peerj-07-7016-s003.xlsx]

## Sheet: SummaryTableEvergreen
Class	Serie	Parameter	Sample Size	Training	Testing	Feature	Regularization	Threshold	TP	FP	FN	TN	Total	Kappa
Evergreen	S40T50T50	Auto	40	50	50	Auto	1	BTOPA	116	226	9	649	1000	0.38401
Evergreen	S40T50T50	Auto	40	50	50	Auto	1	EETOD	107	122	18	753	1000	0.528222
Evergreen	S40T50T50	Auto	40	50	50	Auto	1	ETeSS	104	90	21	785	1000	0.589649
Evergreen	S40T50T50	Auto	40	50	50	Auto	1	ETrSS	99	72	26	803	1000	0.613031
Evergreen	S40T50T50	Auto	40	50	50	Auto	1	FC1	121	375	4	500	1000	0.237425
Evergreen	S40T50T50	Auto	40	50	50	Auto	1	FC5	115	193	10	682	1000	0.429775
Evergreen	S40T50T50	Auto	40	50	50	Auto	1	FC10	108	125	17	750	1000	0.526272
Evergreen	S40T50T50	Auto	40	50	50	Auto	1	MTeSPS	106	108	19	767	1000	0.555166
Evergreen	S40T50T50	Auto	40	50	50	Auto	1	MTP	111	148	14	727	1000	0.492561
Evergreen	S40T50T50	Auto	40	50	50	Auto	1	MTrSPS	99	56	26	819	1000	0.660104
Evergreen	S40T50T50	Auto	40	50	50	Auto	1	10PTP	99	51	26	824	1000	0.675789
Evergreen	S40T50T50	H_1	40	50	50	H	1	BTOPA	120	280	5	595	1000	0.329412
Evergreen	S40T50T50	H_1	40	50	50	H	1	EETOD	115	205	10	670	1000	0.410959
Evergreen	S40T50T50	H_1	40	50	50	H	1	ETeSS	103	128	22	747	1000	0.497066
Evergreen	S40T50T50	H_1	40	50	50	H	1	ETrSS	102	120	23	755	1000	0.509434
Evergreen	S40T50T50	H_1	40	50	50	H	1	FC1	125	674	0	201	1000	0.0693821
Evergreen	S40T50T50	H_1	40	50	50	H	1	FC5	121	331	4	544	1000	0.278017
Evergreen	S40T50T50	H_1	40	50	50	H	1	FC10	116	219	9	656	1000	0.39402
Evergreen	S40T50T50	H_1	40	50	50	H	1	MTeSPS	109	151	16	724	1000	0.478125
Evergreen	S40T50T50	H_1	40	50	50	H	1	MTP	112	180	13	695	1000	0.438953
Evergreen	S40T50T50	H_1	40	50	50	H	1	MTrSPS	100	111	25	764	1000	0.519859
Evergreen	S40T50T50	H_1	40	50	50	H	1	10PTP	100	92	25	783	1000	0.565056
Evergreen	S40T50T50	H_3	40	50	50	H	3	BTOPA	123	415	2	460	1000	0.210974
Evergreen	S40T50T50	H_3	40	50	50	H	3	EETOD	123	453	2	422	1000	0.183124
Evergreen	S40T50T50	H_3	40	50	50	H	3	ETeSS	103	129	22	746	1000	0.494983
Evergreen	S40T50T50	H_3	40	50	50	H	3	ETrSS	103	132	22	743	1000	0.488797
Evergreen	S40T50T50	H_3	40	50	50	H	3	FC1	125	819	0	56	1000	0.0168067
Evergreen	S40T50T50	H_3	40	50	50	H	3	FC5	124	605	1	270	1000	0.0978787
Evergreen	S40T50T50	H_3	40	50	50	H	3	FC10	123	449	2	426	1000	0.185921
Evergreen	S40T50T50	H_3	40	50	50	H	3	MTeSPS	110	188	15	687	1000	0.417504
Evergreen	S40T50T50	H_3	40	50	50	H	3	MTP	117	256	8	619	1000	0.347746
Evergreen	S40T50T50	H_3	40	50	50	H	3	MTrSPS	107	160	18	715	1000	0.452729
Evergreen	S40T50T50	H_3	40	50	50	H	3	10PTP	105	142	20	733	1000	0.47784
Evergreen	S40T50T50	H_5	40	50	50	H	5	BTOPA	123	499	2	376	1000	0.153001
Evergreen	S40T50T50	H_5	40	50	50	H	5	EETOD	124	528	1	347	1000	0.138436
Evergreen	S40T50T50	H_5	40	50	50	H	5	ETeSS	106	160	19	715	1000	0.448382
Evergreen	S40T50T50	H_5	40	50	50	H	5	ETrSS	103	149	22	726	1000	0.455414
Evergreen	S40T50T50	H_5	40	50	50	H	5	FC1	125	801	0	74	1000	0.0225747
Evergreen	S40T50T50	H_5	40	50	50	H	5	FC5	125	642	0	233	1000	0.0831846
Evergreen	S40T50T50	H_5	40	50	50	H	5	FC10	123	492	2	383	1000	0.157356
Evergreen	S40T50T50	H_5	40	50	50	H	5	MTeSPS	112	186	13	689	1000	0.428981
Evergreen	S40T50T50	H_5	40	50	50	H	5	MTP	115	221	10	654	1000	0.387268
Evergreen	S40T50T50	H_5	40	50	50	H	5	MTrSPS	112	200	13	675	1000	0.406685
Evergreen	S40T50T50	H_5	40	50	50	H	5	10PTP	110	182	15	693	1000	0.427326
Evergreen	S40T50T50	H_025	40	50	50	H	0.25	BTOPA	112	189	13	686	1000	0.424091
Evergreen	S40T50T50	H_025	40	50	50	H	0.25	EETOD	103	113	22	762	1000	0.529617
Evergreen	S40T50T50	H_025	40	50	50	H	0.25	ETeSS	105	128	20	747	1000	0.506255
Evergreen	S40T50T50	H_025	40	50	50	H	0.25	ETrSS	97	57	28	818	1000	0.64657
Evergreen	S40T50T50	H_025	40	50	50	H	0.25	FC1	119	276	6	599	1000	0.330564
Evergreen	S40T50T50	H_025	40	50	50	H	0.25	FC5	111	156	14	719	1000	0.477325
Evergreen	S40T50T50	H_025	40	50	50	H	0.25	FC10	104	116	21	759	1000	0.527586
Evergreen	S40T50T50	H_025	40	50	50	H	0.25	MTeSPS	103	108	22	767	1000	0.541041
Evergreen	S40T50T50	H_025	40	50	50	H	0.25	MTP	101	99	24	776	1000	0.552727
Evergreen	S40T50T50	H_025	40	50	50	H	0.25	MTrSPS	99	84	26	791	1000	0.580553
Evergreen	S40T50T50	H_025	40	50	50	H	0.25	10PTP	96	44	29	831	1000	0.682609
Evergreen	S40T50T50	L_1	40	50	50	L	1	BTOPA	119	313	6	562	1000	0.289532
Evergreen	S40T50T50	L_1	40	50	50	L	1	EETOD	118	278	7	597	1000	0.324645
Evergreen	S40T50T50	L_1	40	50	50	L	1	ETeSS	103	135	22	740	1000	0.482702
Evergreen	S40T50T50	L_1	40	50	50	L	1	ETrSS	102	132	23	743	1000	0.484193
Evergreen	S40T50T50	L_1	40	50	50	L	1	FC1	124	652	1	223	1000	0.0763791
Evergreen	S40T50T50	L_1	40	50	50	L	1	FC5	121	388	4	487	1000	0.226443
Evergreen	S40T50T50	L_1	40	50	50	L	1	FC10	118	278	7	597	1000	0.324645
Evergreen	S40T50T50	L_1	40	50	50	L	1	MTeSPS	108	162	17	713	1000	0.453435
Evergreen	S40T50T50	L_1	40	50	50	L	1	MTP	112	186	13	689	1000	0.428981
Evergreen	S40T50T50	L_1	40	50	50	L	1	MTrSPS	112	177	13	698	1000	0.444038
Evergreen	S40T50T50	L_1	40	50	50	L	1	10PTP	104	141	21	734	1000	0.475304
Evergreen	S40T50T50	L_3	40	50	50	L	3	BTOPA	121	379	4	496	1000	0.234
Evergreen	S40T50T50	L_3	40	50	50	L	3	EETOD	120	352	5	523	1000	0.254697
Evergreen	S40T50T50	L_3	40	50	50	L	3	ETeSS	102	134	23	741	1000	0.480132
Evergreen	S40T50T50	L_3	40	50	50	L	3	ETrSS	103	147	22	728	1000	0.4592
Evergreen	S40T50T50	L_3	40	50	50	L	3	FC1	124	690	1	185	1000	0.0605031
Evergreen	S40T50T50	L_3	40	50	50	L	3	FC5	122	475	3	400	1000	0.16543
Evergreen	S40T50T50	L_3	40	50	50	L	3	FC10	120	349	5	526	1000	0.257472
Evergreen	S40T50T50	L_3	40	50	50	L	3	MTeSPS	108	168	17	707	1000	0.442771
Evergreen	S40T50T50	L_3	40	50	50	L	3	MTP	113	212	12	663	1000	0.392542
Evergreen	S40T50T50	L_3	40	50	50	L	3	MTrSPS	109	180	16	695	1000	0.426481
Evergreen	S40T50T50	L_3	40	50	50	L	3	10PTP	104	154	21	721	1000	0.450549
Evergreen	S40T50T50	L_5	40	50	50	L	5	BTOPA	122	480	3	395	1000	0.162186
Evergreen	S40T50T50	L_5	40	50	50	L	5	EETOD	122	469	3	406	1000	0.16938
Evergreen	S40T50T50	L_5	40	50	50	L	5	ETeSS	104	155	21	720	1000	0.448708
Evergreen	S40T50T50	L_5	40	50	50	L	5	ETrSS	105	162	20	713	1000	0.44043
Evergreen	S40T50T50	L_5	40	50	50	L	5	FC1	125	737	0	138	1000	0.0447181
Evergreen	S40T50T50	L_5	40	50	50	L	5	FC5	122	562	3	313	1000	0.11442
Evergreen	S40T50T50	L_5	40	50	50	L	5	FC10	122	435	3	440	1000	0.192999
Evergreen	S40T50T50	L_5	40	50	50	L	5	MTeSPS	111	198	14	677	1000	0.405746
Evergreen	S40T50T50	L_5	40	50	50	L	5	MTP	114	224	11	651	1000	0.379128
Evergreen	S40T50T50	L_5	40	50	50	L	5	MTrSPS	114	215	11	660	1000	0.392065
Evergreen	S40T50T50	L_5	40	50	50	L	5	10PTP	109	190	16	685	1000	0.410165
Evergreen	S40T50T50	L_025	40	50	50	L	0.25	BTOPA	118	254	7	621	1000	0.35396
Evergreen	S40T50T50	L_025	40	50	50	L	0.25	EETOD	113	200	12	675	1000	0.410702
Evergreen	S40T50T50	L_025	40	50	50	L	0.25	ETeSS	102	124	23	751	1000	0.500849
Evergreen	S40T50T50	L_025	40	50	50	L	0.25	ETrSS	102	113	23	762	1000	0.524891
Evergreen	S40T50T50	L_025	40	50	50	L	0.25	FC1	123	574	2	301	1000	0.110768
Evergreen	S40T50T50	L_025	40	50	50	L	0.25	FC5	120	312	5	563	1000	0.293987
Evergreen	S40T50T50	L_025	40	50	50	L	0.25	FC10	114	210	11	665	1000	0.399457
Evergreen	S40T50T50	L_025	40	50	50	L	0.25	MTeSPS	104	137	21	738	1000	0.483238
Evergreen	S40T50T50	L_025	40	50	50	L	0.25	MTP	113	199	12	676	1000	0.412256
Evergreen	S40T50T50	L_025	40	50	50	L	0.25	MTrSPS	106	148	19	727	1000	0.470681
Evergreen	S40T50T50	L_025	40	50	50	L	0.25	10PTP	102	133	23	742	1000	0.482158
Evergreen	S40T50T50	LQ_1	40	50	50	LQ	1	BTOPA	122	444	3	431	1000	0.186533
Evergreen	S40T50T50	LQ_1	40	50	50	LQ	1	EETOD	119	246	6	629	1000	0.368025
Evergreen	S40T50T50	LQ_1	40	50	50	LQ	1	ETeSS	108	109	17	766	1000	0.56212
Evergreen	S40T50T50	LQ_1	40	50	50	LQ	1	ETrSS	107	104	18	771	1000	0.569285
Evergreen	S40T50T50	LQ_1	40	50	50	LQ	1	FC1	123	649	2	226	1000	0.0752841
Evergreen	S40T50T50	LQ_1	40	50	50	LQ	1	FC5	122	439	3	436	1000	0.190105
Evergreen	S40T50T50	LQ_1	40	50	50	LQ	1	FC10	121	282	4	593	1000	0.330603
Evergreen	S40T50T50	LQ_1	40	50	50	LQ	1	MTeSPS	110	138	15	737	1000	0.508039
Evergreen	S40T50T50	LQ_1	40	50	50	LQ	1	MTP	121	287	4	588	1000	0.324826
Evergreen	S40T50T50	LQ_1	40	50	50	LQ	1	MTrSPS	114	159	11	716	1000	0.484458
Evergreen	S40T50T50	LQ_1	40	50	50	LQ	1	10PTP	107	103	18	772	1000	0.571681
Evergreen	S40T50T50	LQ_3	40	50	50	LQ	3	BTOPA	122	437	3	438	1000	0.191548
Evergreen	S40T50T50	LQ_3	40	50	50	LQ	3	EETOD	122	356	3	519	1000	0.257497
Evergreen	S40T50T50	LQ_3	40	50	50	LQ	3	ETeSS	108	140	17	735	1000	0.495177
Evergreen	S40T50T50	LQ_3	40	50	50	LQ	3	ETrSS	107	129	18	746	1000	0.513245
Evergreen	S40T50T50	LQ_3	40	50	50	LQ	3	FC1	124	687	1	188	1000	0.0617116
Evergreen	S40T50T50	LQ_3	40	50	50	LQ	3	FC5	122	485	3	390	1000	0.158983
Evergreen	S40T50T50	LQ_3	40	50	50	LQ	3	FC10	122	358	3	517	1000	0.25567
Evergreen	S40T50T50	LQ_3	40	50	50	LQ	3	MTeSPS	113	161	12	714	1000	0.476551
Evergreen	S40T50T50	LQ_3	40	50	50	LQ	3	MTP	118	278	7	597	1000	0.324645
Evergreen	S40T50T50	LQ_3	40	50	50	LQ	3	MTrSPS	109	142	16	733	1000	0.495611
Evergreen	S40T50T50	LQ_3	40	50	50	LQ	3	10PTP	107	129	18	746	1000	0.513245
Evergreen	S40T50T50	LQ_5	40	50	50	LQ	5	BTOPA	122	513	3	362	1000	0.141788
Evergreen	S40T50T50	LQ_5	40	50	50	LQ	5	EETOD	122	462	3	413	1000	0.174067
Evergreen	S40T50T50	LQ_5	40	50	50	LQ	5	ETeSS	106	116	19	759	1000	0.536878
Evergreen	S40T50T50	LQ_5	40	50	50	LQ	5	ETrSS	107	132	18	743	1000	0.506984
Evergreen	S40T50T50	LQ_5	40	50	50	LQ	5	FC1	124	712	1	163	1000	0.0518617
Evergreen	S40T50T50	LQ_5	40	50	50	LQ	5	FC5	123	552	2	323	1000	0.122376
Evergreen	S40T50T50	LQ_5	40	50	50	LQ	5	FC10	122	435	3	440	1000	0.192999
Evergreen	S40T50T50	LQ_5	40	50	50	LQ	5	MTeSPS	108	137	17	738	1000	0.501215
Evergreen	S40T50T50	LQ_5	40	50	50	LQ	5	MTP	118	261	7	614	1000	0.345144
Evergreen	S40T50T50	LQ_5	40	50	50	LQ	5	MTrSPS	109	161	16	714	1000	0.459542
Evergreen	S40T50T50	LQ_5	40	50	50	LQ	5	10PTP	108	139	17	736	1000	0.49718
Evergreen	S40T50T50	LQ_025	40	50	50	LQ	0.25	BTOPA	120	198	5	677	1000	0.441541
Evergreen	S40T50T50	LQ_025	40	50	50	LQ	0.25	EETOD	109	116	16	759	1000	0.550638
Evergreen	S40T50T50	LQ_025	40	50	50	LQ	0.25	ETeSS	107	98	18	777	1000	0.583857
Evergreen	S40T50T50	LQ_025	40	50	50	LQ	0.25	ETrSS	104	47	21	828	1000	0.714586
Evergreen	S40T50T50	LQ_025	40	50	50	LQ	0.25	FC1	122	345	3	530	1000	0.267754
Evergreen	S40T50T50	LQ_025	40	50	50	LQ	0.25	FC5	117	173	8	702	1000	0.471533
Evergreen	S40T50T50	LQ_025	40	50	50	LQ	0.25	FC10	111	119	14	756	1000	0.552941
Evergreen	S40T50T50	LQ_025	40	50	50	LQ	0.25	MTeSPS	105	76	20	799	1000	0.631831
Evergreen	S40T50T50	LQ_025	40	50	50	LQ	0.25	MTP	114	122	11	753	1000	0.559603
Evergreen	S40T50T50	LQ_025	40	50	50	LQ	0.25	MTrSPS	105	63	20	812	1000	0.669323
Evergreen	S40T50T50	LQ_025	40	50	50	LQ	0.25	10PTP	101	41	24	834	1000	0.719222
Evergreen	S40T50T50	LQP_1	40	50	50	LQP	1	BTOPA	118	232	7	643	1000	0.383226
Evergreen	S40T50T50	LQP_1	40	50	50	LQP	1	EETOD	111	151	14	724	1000	0.486781
Evergreen	S40T50T50	LQP_1	40	50	50	LQP	1	ETeSS	106	97	19	778	1000	0.581605
Evergreen	S40T50T50	LQP_1	40	50	50	LQP	1	ETrSS	102	66	23	809	1000	0.645418
Evergreen	S40T50T50	LQP_1	40	50	50	LQP	1	FC1	120	313	5	562	1000	0.292941
Evergreen	S40T50T50	LQP_1	40	50	50	LQP	1	FC5	115	198	10	677	1000	0.421821
Evergreen	S40T50T50	LQP_1	40	50	50	LQP	1	FC10	108	141	17	734	1000	0.493184
Evergreen	S40T50T50	LQP_1	40	50	50	LQP	1	MTeSPS	108	124	17	751	1000	0.528428
Evergreen	S40T50T50	LQP_1	40	50	50	LQP	1	MTP	108	143	17	732	1000	0.489226
Evergreen	S40T50T50	LQP_1	40	50	50	LQP	1	MTrSPS	103	75	22	800	1000	0.624758
Evergreen	S40T50T50	LQP_1	40	50	50	LQP	1	10PTP	100	55	25	820	1000	0.668394
Evergreen	S40T50T50	LQP_3	40	50	50	LQP	3	BTOPA	121	372	4	503	1000	0.24002
Evergreen	S40T50T50	LQP_3	40	50	50	LQP	3	EETOD	121	338	4	537	1000	0.271177
Evergreen	S40T50T50	LQP_3	40	50	50	LQP	3	ETeSS	102	89	23	786	1000	0.582479
Evergreen	S40T50T50	LQP_3	40	50	50	LQP	3	ETrSS	103	102	22	773	1000	0.555157
Evergreen	S40T50T50	LQP_3	40	50	50	LQP	3	FC1	122	539	3	336	1000	0.126863
Evergreen	S40T50T50	LQP_3	40	50	50	LQP	3	FC5	121	361	4	514	1000	0.249743
Evergreen	S40T50T50	LQP_3	40	50	50	LQP	3	FC10	118	293	7	582	1000	0.307559
Evergreen	S40T50T50	LQP_3	40	50	50	LQP	3	MTeSPS	103	110	22	765	1000	0.536435
Evergreen	S40T50T50	LQP_3	40	50	50	LQP	3	MTP	111	177	14	698	1000	0.439883
Evergreen	S40T50T50	LQP_3	40	50	50	LQP	3	MTrSPS	111	177	14	698	1000	0.439883
Evergreen	S40T50T50	LQP_3	40	50	50	LQP	3	10PTP	103	111	22	764	1000	0.534151
Evergreen	S40T50T50	LQP_5	40	50	50	LQP	5	BTOPA	122	465	3	410	1000	0.172048
Evergreen	S40T50T50	LQP_5	40	50	50	LQP	5	EETOD	121	438	4	437	1000	0.187873
Evergreen	S40T50T50	LQP_5	40	50	50	LQP	5	ETeSS	104	147	21	728	1000	0.463687
Evergreen	S40T50T50	LQP_5	40	50	50	LQP	5	ETrSS	102	110	23	765	1000	0.53169
Evergreen	S40T50T50	LQP_5	40	50	50	LQP	5	FC1	123	629	2	246	1000	0.08418
Evergreen	S40T50T50	LQP_5	40	50	50	LQP	5	FC5	122	489	3	386	1000	0.156451
Evergreen	S40T50T50	LQP_5	40	50	50	LQP	5	FC10	121	387	4	488	1000	0.227273
Evergreen	S40T50T50	LQP_5	40	50	50	LQP	5	MTeSPS	108	162	17	713	1000	0.453435
Evergreen	S40T50T50	LQP_5	40	50	50	LQP	5	MTP	110	199	15	676	1000	0.40014
Evergreen	S40T50T50	LQP_5	40	50	50	LQP	5	MTrSPS	105	156	20	719	1000	0.451286
Evergreen	S40T50T50	LQP_5	40	50	50	LQP	5	10PTP	102	119	23	756	1000	0.511608
Evergreen	S40T50T50	LQP_025	40	50	50	LQP	0.25	BTOPA	116	172	9	703	1000	0.469208
Evergreen	S40T50T50	LQP_025	40	50	50	LQP	0.25	EETOD	108	101	17	774	1000	0.581189
Evergreen	S40T50T50	LQP_025	40	50	50	LQP	0.25	ETeSS	104	79	21	796	1000	0.618684
Evergreen	S40T50T50	LQP_025	40	50	50	LQP	0.25	ETrSS	102	56	23	819	1000	0.675565
Evergreen	S40T50T50	LQP_025	40	50	50	LQP	0.25	FC1	118	229	7	646	1000	0.387411
Evergreen	S40T50T50	LQP_025	40	50	50	LQP	0.25	FC5	112	131	13	744	1000	0.531326
Evergreen	S40T50T50	LQP_025	40	50	50	LQP	0.25	FC10	107	95	18	780	1000	0.59132
Evergreen	S40T50T50	LQP_025	40	50	50	LQP	0.25	MTeSPS	104	83	21	792	1000	0.607917
Evergreen	S40T50T50	LQP_025	40	50	50	LQP	0.25	MTP	108	108	17	767	1000	0.56446
Evergreen	S40T50T50	LQP_025	40	50	50	LQP	0.25	MTrSPS	104	80	21	795	1000	0.61597
Evergreen	S40T50T50	LQP_025	40	50	50	LQP	0.25	10PTP	101	50	24	825	1000	0.689402
Evergreen	S40T50T50	LQPT_1	40	50	50	LQPT	1	BTOPA	117	248	8	627	1000	0.357994
Evergreen	S40T50T50	LQPT_1	40	50	50	LQPT	1	EETOD	110	160	15	715	1000	0.465649
Evergreen	S40T50T50	LQPT_1	40	50	50	LQPT	1	ETeSS	105	130	20	745	1000	0.502075
Evergreen	S40T50T50	LQPT_1	40	50	50	LQPT	1	ETrSS	101	103	24	772	1000	0.543165
Evergreen	S40T50T50	LQPT_1	40	50	50	LQPT	1	FC1	122	434	3	441	1000	0.193727
Evergreen	S40T50T50	LQPT_1	40	50	50	LQPT	1	FC5	117	254	8	621	1000	0.350279
Evergreen	S40T50T50	LQPT_1	40	50	50	LQPT	1	FC10	112	172	13	703	1000	0.452663
Evergreen	S40T50T50	LQPT_1	40	50	50	LQPT	1	MTeSPS	107	140	18	735	1000	0.490733
Evergreen	S40T50T50	LQPT_1	40	50	50	LQPT	1	MTP	105	127	20	748	1000	0.508361
Evergreen	S40T50T50	LQPT_1	40	50	50	LQPT	1	MTrSPS	105	127	20	748	1000	0.508361
Evergreen	S40T50T50	LQPT_1	40	50	50	LQPT	1	10PTP	101	76	24	799	1000	0.612027
Evergreen	S40T50T50	LQPT_3	40	50	50	LQPT	3	BTOPA	121	344	4	531	1000	0.265435
Evergreen	S40T50T50	LQPT_3	40	50	50	LQPT	3	EETOD	118	300	7	575	1000	0.299886
Evergreen	S40T50T50	LQPT_3	40	50	50	LQPT	3	ETeSS	102	108	23	767	1000	0.536283
Evergreen	S40T50T50	LQPT_3	40	50	50	LQPT	3	ETrSS	102	98	23	777	1000	0.56
Evergreen	S40T50T50	LQPT_3	40	50	50	LQPT	3	FC1	122	519	3	356	1000	0.138258
Evergreen	S40T50T50	LQPT_3	40	50	50	LQPT	3	FC5	121	341	4	534	1000	0.268293
Evergreen	S40T50T50	LQPT_3	40	50	50	LQPT	3	FC10	116	260	9	615	1000	0.339066
Evergreen	S40T50T50	LQPT_3	40	50	50	LQPT	3	MTeSPS	102	102	23	773	1000	0.55036
Evergreen	S40T50T50	LQPT_3	40	50	50	LQPT	3	MTP	105	133	20	742	1000	0.495881
Evergreen	S40T50T50	LQPT_3	40	50	50	LQPT	3	MTrSPS	105	133	20	742	1000	0.495881
Evergreen	S40T50T50	LQPT_3	40	50	50	LQPT	3	10PTP	102	109	23	766	1000	0.533981
Evergreen	S40T50T50	LQPT_5	40	50	50	LQPT	5	BTOPA	122	488	3	387	1000	0.157082
Evergreen	S40T50T50	LQPT_5	40	50	50	LQPT	5	EETOD	122	457	3	418	1000	0.17747
Evergreen	S40T50T50	LQPT_5	40	50	50	LQPT	5	ETeSS	106	141	19	734	1000	0.484287
Evergreen	S40T50T50	LQPT_5	40	50	50	LQPT	5	ETrSS	102	98	23	777	1000	0.56
Evergreen	S40T50T50	LQPT_5	40	50	50	LQPT	5	FC1	123	662	2	213	1000	0.0697023
Evergreen	S40T50T50	LQPT_5	40	50	50	LQPT	5	FC5	122	502	3	373	1000	0.148398
Evergreen	S40T50T50	LQPT_5	40	50	50	LQPT	5	FC10	121	400	4	475	1000	0.216675
Evergreen	S40T50T50	LQPT_5	40	50	50	LQPT	5	MTeSPS	108	153	17	722	1000	0.469992
Evergreen	S40T50T50	LQPT_5	40	50	50	LQPT	5	MTP	109	207	16	668	1000	0.383978
Evergreen	S40T50T50	LQPT_5	40	50	50	LQPT	5	MTrSPS	107	144	18	731	1000	0.482841
Evergreen	S40T50T50	LQPT_5	40	50	50	LQPT	5	10PTP	103	106	22	769	1000	0.545697
Evergreen	S40T50T50	LQPT_025	40	50	50	LQPT	0.25	BTOPA	113	192	12	683	1000	0.423322
Evergreen	S40T50T50	LQPT_025	40	50	50	LQPT	0.25	EETOD	97	70	28	805	1000	0.608392
Evergreen	S40T50T50	LQPT_025	40	50	50	LQPT	0.25	ETeSS	113	192	12	683	1000	0.423322
Evergreen	S40T50T50	LQPT_025	40	50	50	LQPT	0.25	ETrSS	82	41	43	834	1000	0.613349
Evergreen	S40T50T50	LQPT_025	40	50	50	LQPT	0.25	FC1	119	443	6	432	1000	0.178408
Evergreen	S40T50T50	LQPT_025	40	50	50	LQPT	0.25	FC5	110	182	15	693	1000	0.427326
Evergreen	S40T50T50	LQPT_025	40	50	50	LQPT	0.25	FC10	107	113	18	762	1000	0.548276
Evergreen	S40T50T50	LQPT_025	40	50	50	LQPT	0.25	MTeSPS	110	178	15	697	1000	0.434018
Evergreen	S40T50T50	LQPT_025	40	50	50	LQPT	0.25	MTP	83	43	42	832	1000	0.612756
Evergreen	S40T50T50	LQPT_025	40	50	50	LQPT	0.25	MTrSPS	83	43	42	832	1000	0.612756
Evergreen	S40T50T50	LQPT_025	40	50	50	LQPT	0.25	10PTP	47	16	78	859	1000	0.454282
Evergreen	S40T50T50	LQPTH_1	40	50	50	LQPTH	1	BTOPA	119	287	6	588	1000	0.317811
Evergreen	S40T50T50	LQPTH_1	40	50	50	LQPTH	1	EETOD	110	192	15	683	1000	0.411095
Evergreen	S40T50T50	LQPTH_1	40	50	50	LQPTH	1	ETeSS	105	133	20	742	1000	0.495881
Evergreen	S40T50T50	LQPTH_1	40	50	50	LQPTH	1	ETrSS	100	84	25	791	1000	0.585551
Evergreen	S40T50T50	LQPTH_1	40	50	50	LQPTH	1	FC1	121	423	4	452	1000	0.198874
Evergreen	S40T50T50	LQPTH_1	40	50	50	LQPTH	1	FC5	118	270	7	605	1000	0.334135
Evergreen	S40T50T50	LQPTH_1	40	50	50	LQPTH	1	FC10	110	195	15	680	1000	0.40636
Evergreen	S40T50T50	LQPTH_1	40	50	50	LQPTH	1	MTeSPS	109	162	16	713	1000	0.45773
Evergreen	S40T50T50	LQPTH_1	40	50	50	LQPTH	1	MTP	105	133	20	742	1000	0.495881
Evergreen	S40T50T50	LQPTH_1	40	50	50	LQPTH	1	MTrSPS	102	100	23	775	1000	0.555154
Evergreen	S40T50T50	LQPTH_1	40	50	50	LQPTH	1	10PTP	98	50	27	825	1000	0.673729
Evergreen	S40T50T50	LQPTH_3	40	50	50	LQPTH	3	BTOPA	121	386	4	489	1000	0.228105
Evergreen	S40T50T50	LQPTH_3	40	50	50	LQPTH	3	EETOD	120	316	5	559	1000	0.289823
Evergreen	S40T50T50	LQPTH_3	40	50	50	LQPTH	3	ETeSS	103	101	22	774	1000	0.557554
Evergreen	S40T50T50	LQPTH_3	40	50	50	LQPTH	3	ETrSS	101	74	24	801	1000	0.617561
Evergreen	S40T50T50	LQPTH_3	40	50	50	LQPTH	3	FC1	122	537	3	338	1000	0.127977
Evergreen	S40T50T50	LQPTH_3	40	50	50	LQPTH	3	FC5	121	369	4	506	1000	0.24264
Evergreen	S40T50T50	LQPTH_3	40	50	50	LQPTH	3	FC10	119	284	6	591	1000	0.32124
Evergreen	S40T50T50	LQPTH_3	40	50	50	LQPTH	3	MTeSPS	101	83	24	792	1000	0.593156
Evergreen	S40T50T50	LQPTH_3	40	50	50	LQPTH	3	MTP	108	150	17	725	1000	0.475667
Evergreen	S40T50T50	LQPTH_3	40	50	50	LQPTH	3	MTrSPS	104	107	21	768	1000	0.548102
Evergreen	S40T50T50	LQPTH_3	40	50	50	LQPTH	3	10PTP	101	69	24	806	1000	0.631683
Evergreen	S40T50T50	LQPTH_5	40	50	50	LQPTH	5	BTOPA	122	493	3	382	1000	0.153945
Evergreen	S40T50T50	LQPTH_5	40	50	50	LQPTH	5	EETOD	122	468	3	407	1000	0.170044
Evergreen	S40T50T50	LQPTH_5	40	50	50	LQPTH	5	ETeSS	107	150	18	725	1000	0.471282
Evergreen	S40T50T50	LQPTH_5	40	50	50	LQPTH	5	ETrSS	104	125	21	750	1000	0.508003
Evergreen	S40T50T50	LQPTH_5	40	50	50	LQPTH	5	FC1	123	653	2	222	1000	0.0735502
Evergreen	S40T50T50	LQPTH_5	40	50	50	LQPTH	5	FC5	122	500	3	375	1000	0.14962
Evergreen	S40T50T50	LQPTH_5	40	50	50	LQPTH	5	FC10	121	408	4	467	1000	0.21035
Evergreen	S40T50T50	LQPTH_5	40	50	50	LQPTH	5	MTeSPS	108	173	17	702	1000	0.434103
Evergreen	S40T50T50	LQPTH_5	40	50	50	LQPTH	5	MTP	110	213	15	662	1000	0.37917
Evergreen	S40T50T50	LQPTH_5	40	50	50	LQPTH	5	MTrSPS	108	182	17	693	1000	0.418978
Evergreen	S40T50T50	LQPTH_5	40	50	50	LQPTH	5	10PTP	104	143	21	732	1000	0.471394
Evergreen	S40T50T50	LQPTH_025	40	50	50	LQPTH	0.25	BTOPA	111	203	14	672	1000	0.398058
Evergreen	S40T50T50	LQPTH_025	40	50	50	LQPTH	0.25	EETOD	97	76	28	799	1000	0.591757
Evergreen	S40T50T50	LQPTH_025	40	50	50	LQPTH	0.25	ETeSS	111	173	14	702	1000	0.446746
Evergreen	S40T50T50	LQPTH_025	40	50	50	LQPTH	0.25	ETrSS	69	16	56	859	1000	0.618543
Evergreen	S40T50T50	LQPTH_025	40	50	50	LQPTH	0.25	FC1	115	340	10	535	1000	0.24933
Evergreen	S40T50T50	LQPTH_025	40	50	50	LQPTH	0.25	FC5	111	171	14	704	1000	0.450223
Evergreen	S40T50T50	LQPTH_025	40	50	50	LQPTH	0.25	FC10	100	114	25	761	1000	0.513135
Evergreen	S40T50T50	LQPTH_025	40	50	50	LQPTH	0.25	MTeSPS	111	189	14	686	1000	0.42
Evergreen	S40T50T50	LQPTH_025	40	50	50	LQPTH	0.25	MTP	69	16	56	859	1000	0.618543
Evergreen	S40T50T50	LQPTH_025	40	50	50	LQPTH	0.25	MTrSPS	69	16	56	859	1000	0.618543
Evergreen	S40T50T50	LQPTH_025	40	50	50	LQPTH	0.25	10PTP	45	5	80	870	1000	0.476923
Evergreen	S40T50T50	PT_1	40	50	50	PT	1	BTOPA	114	253	11	622	1000	0.340412
Evergreen	S40T50T50	PT_1	40	50	50	PT	1	EETOD	109	150	16	725	1000	0.480031
Evergreen	S40T50T50	PT_1	40	50	50	PT	1	ETeSS	103	122	22	753	1000	0.509787
Evergreen	S40T50T50	PT_1	40	50	50	PT	1	ETrSS	101	90	24	785	1000	0.575023
Evergreen	S40T50T50	PT_1	40	50	50	PT	1	FC1	120	375	5	500	1000	0.234257
Evergreen	S40T50T50	PT_1	40	50	50	PT	1	FC5	113	231	12	644	1000	0.365535
Evergreen	S40T50T50	PT_1	40	50	50	PT	1	FC10	112	168	13	707	1000	0.459701
Evergreen	S40T50T50	PT_1	40	50	50	PT	1	MTeSPS	104	126	21	749	1000	0.505882
Evergreen	S40T50T50	PT_1	40	50	50	PT	1	MTP	103	125	22	750	1000	0.503378
Evergreen	S40T50T50	PT_1	40	50	50	PT	1	MTrSPS	102	94	23	781	1000	0.569853
Evergreen	S40T50T50	PT_1	40	50	50	PT	1	10PTP	97	58	28	817	1000	0.643523
Evergreen	S40T50T50	PT_3	40	50	50	PT	3	BTOPA	120	332	5	543	1000	0.273707
Evergreen	S40T50T50	PT_3	40	50	50	PT	3	EETOD	116	294	9	581	1000	0.299422
Evergreen	S40T50T50	PT_3	40	50	50	PT	3	ETeSS	102	104	23	771	1000	0.545617
Evergreen	S40T50T50	PT_3	40	50	50	PT	3	ETrSS	97	85	28	790	1000	0.567878
Evergreen	S40T50T50	PT_3	40	50	50	PT	3	FC1	122	522	3	353	1000	0.136513
Evergreen	S40T50T50	PT_3	40	50	50	PT	3	FC5	120	335	5	540	1000	0.270777
Evergreen	S40T50T50	PT_3	40	50	50	PT	3	FC10	114	254	11	621	1000	0.339152
Evergreen	S40T50T50	PT_3	40	50	50	PT	3	MTeSPS	105	142	20	733	1000	0.47784
Evergreen	S40T50T50	PT_3	40	50	50	PT	3	MTP	104	123	21	752	1000	0.512278
Evergreen	S40T50T50	PT_3	40	50	50	PT	3	MTrSPS	98	91	27	784	1000	0.557638
Evergreen	S40T50T50	PT_3	40	50	50	PT	3	10PTP	97	85	28	790	1000	0.567878
Evergreen	S40T50T50	PT_5	40	50	50	PT	5	BTOPA	121	429	4	446	1000	0.194419
Evergreen	S40T50T50	PT_5	40	50	50	PT	5	EETOD	121	422	4	453	1000	0.199624
Evergreen	S40T50T50	PT_5	40	50	50	PT	5	ETeSS	100	114	25	761	1000	0.513135
Evergreen	S40T50T50	PT_5	40	50	50	PT	5	ETrSS	100	105	25	770	1000	0.533632
Evergreen	S40T50T50	PT_5	40	50	50	PT	5	FC1	123	601	2	274	1000	0.0973054
Evergreen	S40T50T50	PT_5	40	50	50	PT	5	FC5	121	444	4	431	1000	0.183599
Evergreen	S40T50T50	PT_5	40	50	50	PT	5	FC10	119	364	6	511	1000	0.240636
Evergreen	S40T50T50	PT_5	40	50	50	PT	5	MTeSPS	103	142	22	733	1000	0.468826
Evergreen	S40T50T50	PT_5	40	50	50	PT	5	MTP	112	198	13	677	1000	0.40979
Evergreen	S40T50T50	PT_5	40	50	50	PT	5	MTrSPS	102	120	23	755	1000	0.509434
Evergreen	S40T50T50	PT_5	40	50	50	PT	5	10PTP	100	105	25	770	1000	0.533632
Evergreen	S40T50T50	PT_025	40	50	50	PT	0.25	BTOPA	112	205	13	670	1000	0.399035
Evergreen	S40T50T50	PT_025	40	50	50	PT	0.25	EETOD	102	77	23	798	1000	0.614272
Evergreen	S40T50T50	PT_025	40	50	50	PT	0.25	ETeSS	111	188	14	687	1000	0.421618
Evergreen	S40T50T50	PT_025	40	50	50	PT	0.25	ETrSS	93	47	32	828	1000	0.656522
Evergreen	S40T50T50	PT_025	40	50	50	PT	0.25	FC1	119	468	6	407	1000	0.161433
Evergreen	S40T50T50	PT_025	40	50	50	PT	0.25	FC5	111	198	14	677	1000	0.405746
Evergreen	S40T50T50	PT_025	40	50	50	PT	0.25	FC10	107	113	18	762	1000	0.548276
Evergreen	S40T50T50	PT_025	40	50	50	PT	0.25	MTeSPS	113	214	12	661	1000	0.389602
Evergreen	S40T50T50	PT_025	40	50	50	PT	0.25	MTP	98	60	27	815	1000	0.64271
Evergreen	S40T50T50	PT_025	40	50	50	PT	0.25	MTrSPS	80	21	45	854	1000	0.671233
Evergreen	S40T50T50	PT_025	40	50	50	PT	0.25	10PTP	54	10	71	865	1000	0.531792
Evergreen	S40T50T50	Q_1	40	50	50	Q	1	BTOPA	122	468	3	407	1000	0.170044
Evergreen	S40T50T50	Q_1	40	50	50	Q	1	EETOD	120	368	5	507	1000	0.240326
Evergreen	S40T50T50	Q_1	40	50	50	Q	1	ETeSS	110	191	15	684	1000	0.412687
Evergreen	S40T50T50	Q_1	40	50	50	Q	1	ETrSS	110	192	15	683	1000	0.411095
Evergreen	S40T50T50	Q_1	40	50	50	Q	1	FC1	123	667	2	208	1000	0.0675958
Evergreen	S40T50T50	Q_1	40	50	50	Q	1	FC5	122	502	3	373	1000	0.148398
Evergreen	S40T50T50	Q_1	40	50	50	Q	1	FC10	120	395	5	480	1000	0.217604
Evergreen	S40T50T50	Q_1	40	50	50	Q	1	MTeSPS	111	224	14	651	1000	0.367442
Evergreen	S40T50T50	Q_1	40	50	50	Q	1	MTP	119	345	6	530	1000	0.257928
Evergreen	S40T50T50	Q_1	40	50	50	Q	1	MTrSPS	111	233	14	642	1000	0.355091
Evergreen	S40T50T50	Q_1	40	50	50	Q	1	10PTP	110	193	15	682	1000	0.40951
Evergreen	S40T50T50	Q_3	40	50	50	Q	3	BTOPA	122	484	3	391	1000	0.15962
Evergreen	S40T50T50	Q_3	40	50	50	Q	3	EETOD	122	408	3	467	1000	0.213397
Evergreen	S40T50T50	Q_3	40	50	50	Q	3	ETeSS	110	201	15	674	1000	0.397069
Evergreen	S40T50T50	Q_3	40	50	50	Q	3	ETrSS	106	155	19	720	1000	0.457521
Evergreen	S40T50T50	Q_3	40	50	50	Q	3	FC1	123	658	2	217	1000	0.0714034
Evergreen	S40T50T50	Q_3	40	50	50	Q	3	FC5	122	493	3	382	1000	0.153945
Evergreen	S40T50T50	Q_3	40	50	50	Q	3	FC10	122	392	3	483	1000	0.226249
Evergreen	S40T50T50	Q_3	40	50	50	Q	3	MTeSPS	112	257	13	618	1000	0.32794
Evergreen	S40T50T50	Q_3	40	50	50	Q	3	MTP	116	319	9	556	1000	0.27313
Evergreen	S40T50T50	Q_3	40	50	50	Q	3	MTrSPS	110	189	15	686	1000	0.415891
Evergreen	S40T50T50	Q_3	40	50	50	Q	3	10PTP	110	180	15	695	1000	0.430657
Evergreen	S40T50T50	Q_5	40	50	50	Q	5	BTOPA	122	469	3	406	1000	0.16938
Evergreen	S40T50T50	Q_5	40	50	50	Q	5	EETOD	122	434	3	441	1000	0.193727
Evergreen	S40T50T50	Q_5	40	50	50	Q	5	ETeSS	105	161	20	714	1000	0.442219
Evergreen	S40T50T50	Q_5	40	50	50	Q	5	ETrSS	104	135	21	740	1000	0.487264
Evergreen	S40T50T50	Q_5	40	50	50	Q	5	FC1	123	653	2	222	1000	0.0735502
Evergreen	S40T50T50	Q_5	40	50	50	Q	5	FC5	122	491	3	384	1000	0.155195
Evergreen	S40T50T50	Q_5	40	50	50	Q	5	FC10	120	381	5	494	1000	0.229156
Evergreen	S40T50T50	Q_5	40	50	50	Q	5	MTeSPS	112	232	13	643	1000	0.360313
Evergreen	S40T50T50	Q_5	40	50	50	Q	5	MTP	116	286	9	589	1000	0.308324
Evergreen	S40T50T50	Q_5	40	50	50	Q	5	MTrSPS	108	203	17	672	1000	0.385904
Evergreen	S40T50T50	Q_5	40	50	50	Q	5	10PTP	105	164	20	711	1000	0.436878
Evergreen	S40T50T50	Q_025	40	50	50	Q	0.25	BTOPA	122	538	3	337	1000	0.127419
Evergreen	S40T50T50	Q_025	40	50	50	Q	0.25	EETOD	120	339	5	536	1000	0.266915
Evergreen	S40T50T50	Q_025	40	50	50	Q	0.25	ETeSS	107	138	18	737	1000	0.494737
Evergreen	S40T50T50	Q_025	40	50	50	Q	0.25	ETrSS	111	176	14	699	1000	0.441587
Evergreen	S40T50T50	Q_025	40	50	50	Q	0.25	FC1	123	667	2	208	1000	0.0675958
Evergreen	S40T50T50	Q_025	40	50	50	Q	0.25	FC5	122	496	3	379	1000	0.152082
Evergreen	S40T50T50	Q_025	40	50	50	Q	0.25	FC10	121	374	4	501	1000	0.238287
Evergreen	S40T50T50	Q_025	40	50	50	Q	0.25	MTeSPS	109	173	16	702	1000	0.438336
Evergreen	S40T50T50	Q_025	40	50	50	Q	0.25	MTP	122	493	3	382	1000	0.153945
Evergreen	S40T50T50	Q_025	40	50	50	Q	0.25	MTrSPS	112	207	13	668	1000	0.396019
Evergreen	S40T50T50	Q_025	40	50	50	Q	0.25	10PTP	112	216	13	659	1000	0.382749
Evergreen	S40T50T50	QH_1	40	50	50	QH	1	BTOPA	119	245	6	630	1000	0.369347
Evergreen	S40T50T50	QH_1	40	50	50	QH	1	EETOD	112	153	13	722	1000	0.487259
Evergreen	S40T50T50	QH_1	40	50	50	QH	1	ETeSS	105	100	20	775	1000	0.569507
Evergreen	S40T50T50	QH_1	40	50	50	QH	1	ETrSS	102	88	23	787	1000	0.585047
Evergreen	S40T50T50	QH_1	40	50	50	QH	1	FC1	124	551	1	324	1000	0.125545
Evergreen	S40T50T50	QH_1	40	50	50	QH	1	FC5	120	262	5	613	1000	0.351154
Evergreen	S40T50T50	QH_1	40	50	50	QH	1	FC10	112	160	13	715	1000	0.474164
Evergreen	S40T50T50	QH_1	40	50	50	QH	1	MTeSPS	102	88	23	787	1000	0.585047
Evergreen	S40T50T50	QH_1	40	50	50	QH	1	MTP	115	168	10	707	1000	0.472202
Evergreen	S40T50T50	QH_1	40	50	50	QH	1	MTrSPS	102	84	23	791	1000	0.595463
Evergreen	S40T50T50	QH_1	40	50	50	QH	1	10PTP	100	72	25	803	1000	0.61811
Evergreen	S40T50T50	QH_3	40	50	50	QH	3	BTOPA	122	392	3	483	1000	0.226249
Evergreen	S40T50T50	QH_3	40	50	50	QH	3	EETOD	119	333	6	542	1000	0.269397
Evergreen	S40T50T50	QH_3	40	50	50	QH	3	ETeSS	103	111	22	764	1000	0.534151
Evergreen	S40T50T50	QH_3	40	50	50	QH	3	ETrSS	102	102	23	773	1000	0.55036
Evergreen	S40T50T50	QH_3	40	50	50	QH	3	FC1	122	568	3	307	1000	0.111284
Evergreen	S40T50T50	QH_3	40	50	50	QH	3	FC5	122	395	3	480	1000	0.223793
Evergreen	S40T50T50	QH_3	40	50	50	QH	3	FC10	119	311	6	564	1000	0.29162
Evergreen	S40T50T50	QH_3	40	50	50	QH	3	MTeSPS	109	135	16	740	1000	0.50974
Evergreen	S40T50T50	QH_3	40	50	50	QH	3	MTP	119	299	6	576	1000	0.304447
Evergreen	S40T50T50	QH_3	40	50	50	QH	3	MTrSPS	103	117	22	758	1000	0.52069
Evergreen	S40T50T50	QH_3	40	50	50	QH	3	10PTP	102	103	23	772	1000	0.547982
Evergreen	S40T50T50	QH_5	40	50	50	QH	5	BTOPA	122	478	3	397	1000	0.163478
Evergreen	S40T50T50	QH_5	40	50	50	QH	5	EETOD	122	431	3	444	1000	0.195924
Evergreen	S40T50T50	QH_5	40	50	50	QH	5	ETeSS	107	159	18	716	1000	0.454545
Evergreen	S40T50T50	QH_5	40	50	50	QH	5	ETrSS	104	127	21	748	1000	0.503772
Evergreen	S40T50T50	QH_5	40	50	50	QH	5	FC1	123	626	2	249	1000	0.0855479
Evergreen	S40T50T50	QH_5	40	50	50	QH	5	FC5	122	470	3	405	1000	0.168717
Evergreen	S40T50T50	QH_5	40	50	50	QH	5	FC10	121	379	4	496	1000	0.234
Evergreen	S40T50T50	QH_5	40	50	50	QH	5	MTeSPS	113	245	12	630	1000	0.346887
Evergreen	S40T50T50	QH_5	40	50	50	QH	5	MTP	116	312	9	563	1000	0.280269
Evergreen	S40T50T50	QH_5	40	50	50	QH	5	MTrSPS	111	217	14	658	1000	0.377358
Evergreen	S40T50T50	QH_5	40	50	50	QH	5	10PTP	106	144	19	731	1000	0.4784
Evergreen	S40T50T50	QH_025	40	50	50	QH	0.25	BTOPA	114	200	11	675	1000	0.414702
Evergreen	S40T50T50	QH_025	40	50	50	QH	0.25	EETOD	104	111	21	764	1000	0.538865
Evergreen	S40T50T50	QH_025	40	50	50	QH	0.25	ETeSS	106	132	19	743	1000	0.502471
Evergreen	S40T50T50	QH_025	40	50	50	QH	0.25	ETrSS	99	74	26	801	1000	0.607458
Evergreen	S40T50T50	QH_025	40	50	50	QH	0.25	FC1	120	302	5	573	1000	0.304643
Evergreen	S40T50T50	QH_025	40	50	50	QH	0.25	FC5	111	164	14	711	1000	0.462642
Evergreen	S40T50T50	QH_025	40	50	50	QH	0.25	FC10	105	115	20	760	1000	0.534483
Evergreen	S40T50T50	QH_025	40	50	50	QH	0.25	MTeSPS	109	151	16	724	1000	0.478125
Evergreen	S40T50T50	QH_025	40	50	50	QH	0.25	MTP	104	113	21	762	1000	0.534318
Evergreen	S40T50T50	QH_025	40	50	50	QH	0.25	MTrSPS	103	101	22	774	1000	0.557554
Evergreen	S40T50T50	QH_025	40	50	50	QH	0.25	10PTP	96	43	29	832	1000	0.685932
Evergreen	S40T50T50	QP_1	40	50	50	QP	1	BTOPA	118	252	7	623	1000	0.356522
Evergreen	S40T50T50	QP_1	40	50	50	QP	1	EETOD	113	173	12	702	1000	0.455081
Evergreen	S40T50T50	QP_1	40	50	50	QP	1	ETeSS	107	94	18	781	1000	0.593835
Evergreen	S40T50T50	QP_1	40	50	50	QP	1	ETrSS	102	63	23	812	1000	0.654271
Evergreen	S40T50T50	QP_1	40	50	50	QP	1	FC1	122	349	3	526	1000	0.263983
Evergreen	S40T50T50	QP_1	40	50	50	QP	1	FC5	118	219	7	656	1000	0.401721
Evergreen	S40T50T50	QP_1	40	50	50	QP	1	FC10	112	154	13	721	1000	0.485362
Evergreen	S40T50T50	QP_1	40	50	50	QP	1	MTeSPS	102	59	23	816	1000	0.666328
Evergreen	S40T50T50	QP_1	40	50	50	QP	1	MTP	107	130	18	745	1000	0.511148
Evergreen	S40T50T50	QP_1	40	50	50	QP	1	MTrSPS	107	110	18	765	1000	0.555169
Evergreen	S40T50T50	QP_1	40	50	50	QP	1	10PTP	102	48	23	827	1000	0.701053
Evergreen	S40T50T50	QP_3	40	50	50	QP	3	BTOPA	121	373	4	502	1000	0.239152
Evergreen	S40T50T50	QP_3	40	50	50	QP	3	EETOD	121	325	4	550	1000	0.284004
Evergreen	S40T50T50	QP_3	40	50	50	QP	3	ETeSS	102	87	23	788	1000	0.587629
Evergreen	S40T50T50	QP_3	40	50	50	QP	3	ETrSS	102	86	23	789	1000	0.590226
Evergreen	S40T50T50	QP_3	40	50	50	QP	3	FC1	122	534	3	341	1000	0.12966
Evergreen	S40T50T50	QP_3	40	50	50	QP	3	FC5	121	353	4	522	1000	0.257024
Evergreen	S40T50T50	QP_3	40	50	50	QP	3	FC10	118	280	7	595	1000	0.322314
Evergreen	S40T50T50	QP_3	40	50	50	QP	3	MTeSPS	102	86	23	789	1000	0.590226
Evergreen	S40T50T50	QP_3	40	50	50	QP	3	MTP	108	165	17	710	1000	0.448067
Evergreen	S40T50T50	QP_3	40	50	50	QP	3	MTrSPS	106	116	19	759	1000	0.536878
Evergreen	S40T50T50	QP_3	40	50	50	QP	3	10PTP	102	84	23	791	1000	0.595463
Evergreen	S40T50T50	QP_5	40	50	50	QP	5	BTOPA	122	481	3	394	1000	0.161542
Evergreen	S40T50T50	QP_5	40	50	50	QP	5	EETOD	122	459	3	416	1000	0.176103
Evergreen	S40T50T50	QP_5	40	50	50	QP	5	ETeSS	103	126	22	749	1000	0.501264
Evergreen	S40T50T50	QP_5	40	50	50	QP	5	ETrSS	102	115	23	760	1000	0.520417
Evergreen	S40T50T50	QP_5	40	50	50	QP	5	FC1	123	650	2	225	1000	0.0748492
Evergreen	S40T50T50	QP_5	40	50	50	QP	5	FC5	122	485	3	390	1000	0.158983
Evergreen	S40T50T50	QP_5	40	50	50	QP	5	FC10	121	394	4	481	1000	0.221516
Evergreen	S40T50T50	QP_5	40	50	50	QP	5	MTeSPS	103	126	22	749	1000	0.501264
Evergreen	S40T50T50	QP_5	40	50	50	QP	5	MTP	109	187	16	688	1000	0.414986
Evergreen	S40T50T50	QP_5	40	50	50	QP	5	MTrSPS	108	156	17	719	1000	0.464396
Evergreen	S40T50T50	QP_5	40	50	50	QP	5	10PTP	103	122	22	753	1000	0.509787
Evergreen	S40T50T50	QP_025	40	50	50	QP	0.25	BTOPA	116	181	9	694	1000	0.45363
Evergreen	S40T50T50	QP_025	40	50	50	QP	0.25	EETOD	108	97	17	778	1000	0.591031
Evergreen	S40T50T50	QP_025	40	50	50	QP	0.25	ETeSS	104	59	21	816	1000	0.676441
Evergreen	S40T50T50	QP_025	40	50	50	QP	0.25	ETrSS	102	39	23	836	1000	0.731311
Evergreen	S40T50T50	QP_025	40	50	50	QP	0.25	FC1	118	236	7	639	1000	0.377721
Evergreen	S40T50T50	QP_025	40	50	50	QP	0.25	FC5	113	130	12	745	1000	0.537836
Evergreen	S40T50T50	QP_025	40	50	50	QP	0.25	FC10	108	91	17	784	1000	0.606199
Evergreen	S40T50T50	QP_025	40	50	50	QP	0.25	MTeSPS	102	43	23	832	1000	0.717647
Evergreen	S40T50T50	QP_025	40	50	50	QP	0.25	MTP	108	97	17	778	1000	0.591031
Evergreen	S40T50T50	QP_025	40	50	50	QP	0.25	MTrSPS	105	63	20	812	1000	0.669323
Evergreen	S40T50T50	QP_025	40	50	50	QP	0.25	10PTP	100	34	25	841	1000	0.738359
Evergreen	S40T50T50	T_1	40	50	50	T	1	BTOPA	113	363	12	512	1000	0.221992
Evergreen	S40T50T50	T_1	40	50	50	T	1	EETOD	112	278	13	597	1000	0.302994
Evergreen	S40T50T50	T_1	40	50	50	T	1	ETeSS	111	211	14	664	1000	0.386085
Evergreen	S40T50T50	T_1	40	50	50	T	1	ETrSS	103	140	22	735	1000	0.472742
Evergreen	S40T50T50	T_1	40	50	50	T	1	FC1	124	802	1	73	1000	0.0201342
Evergreen	S40T50T50	T_1	40	50	50	T	1	FC5	117	528	8	347	1000	0.119507
Evergreen	S40T50T50	T_1	40	50	50	T	1	FC10	113	367	12	508	1000	0.218557
Evergreen	S40T50T50	T_1	40	50	50	T	1	MTeSPS	111	230	14	645	1000	0.35916
Evergreen	S40T50T50	T_1	40	50	50	T	1	MTP	109	171	16	704	1000	0.441791
Evergreen	S40T50T50	T_1	40	50	50	T	1	MTrSPS	104	141	21	734	1000	0.475304
Evergreen	S40T50T50	T_1	40	50	50	T	1	10PTP	99	94	26	781	1000	0.555144
Evergreen	S40T50T50	T_3	40	50	50	T	3	BTOPA	120	585	5	290	1000	0.0975143
Evergreen	S40T50T50	T_3	40	50	50	T	3	EETOD	119	552	6	323	1000	0.111819
Evergreen	S40T50T50	T_3	40	50	50	T	3	ETeSS	104	166	21	709	1000	0.429008
Evergreen	S40T50T50	T_3	40	50	50	T	3	ETrSS	95	119	30	756	1000	0.478109
Evergreen	S40T50T50	T_3	40	50	50	T	3	FC1	125	872	0	3	1000	0.000859353
Evergreen	S40T50T50	T_3	40	50	50	T	3	FC5	125	780	0	95	1000	0.029549
Evergreen	S40T50T50	T_3	40	50	50	T	3	FC10	123	723	2	152	1000	0.0454246
Evergreen	S40T50T50	T_3	40	50	50	T	3	MTeSPS	109	219	16	656	1000	0.366577
Evergreen	S40T50T50	T_3	40	50	50	T	3	MTP	111	348	14	527	1000	0.228556
Evergreen	S40T50T50	T_3	40	50	50	T	3	MTrSPS	100	139	25	736	1000	0.46097
Evergreen	S40T50T50	T_3	40	50	50	T	3	10PTP	98	135	27	740	1000	0.45955
Evergreen	S40T50T50	T_5	40	50	50	T	5	BTOPA	125	875	0	0	1000	0
Evergreen	S40T50T50	T_5	40	50	50	T	5	EETOD	109	341	16	534	1000	0.228108
Evergreen	S40T50T50	T_5	40	50	50	T	5	ETeSS	105	196	20	679	1000	0.384177
Evergreen	S40T50T50	T_5	40	50	50	T	5	ETrSS	101	156	24	719	1000	0.433517
Evergreen	S40T50T50	T_5	40	50	50	T	5	FC1	124	845	1	30	1000	0.00675081
Evergreen	S40T50T50	T_5	40	50	50	T	5	FC5	119	756	6	119	1000	0.02464
Evergreen	S40T50T50	T_5	40	50	50	T	5	FC10	115	629	10	246	1000	0.0644217
Evergreen	S40T50T50	T_5	40	50	50	T	5	MTeSPS	105	176	20	699	1000	0.416232
Evergreen	S40T50T50	T_5	40	50	50	T	5	MTP	112	440	13	435	1000	0.159555
Evergreen	S40T50T50	T_5	40	50	50	T	5	MTrSPS	104	161	21	714	1000	0.437838
Evergreen	S40T50T50	T_5	40	50	50	T	5	10PTP	101	156	24	719	1000	0.433517
Evergreen	S40T50T50	T_025	40	50	50	T	0.25	BTOPA	108	288	17	587	1000	0.277251
Evergreen	S40T50T50	T_025	40	50	50	T	0.25	EETOD	100	99	25	776	1000	0.547858
Evergreen	S40T50T50	T_025	40	50	50	T	0.25	ETeSS	109	316	16	559	1000	0.251831
Evergreen	S40T50T50	T_025	40	50	50	T	0.25	ETrSS	89	57	36	818	1000	0.603412
Evergreen	S40T50T50	T_025	40	50	50	T	0.25	FC1	118	602	7	273	1000	0.0842105
Evergreen	S40T50T50	T_025	40	50	50	T	0.25	FC5	109	333	16	542	1000	0.235487
Evergreen	S40T50T50	T_025	40	50	50	T	0.25	FC10	106	177	19	698	1000	0.418829
Evergreen	S40T50T50	T_025	40	50	50	T	0.25	MTeSPS	108	256	17	619	1000	0.31407
Evergreen	S40T50T50	T_025	40	50	50	T	0.25	MTP	91	59	34	816	1000	0.608421
Evergreen	S40T50T50	T_025	40	50	50	T	0.25	MTrSPS	91	59	34	816	1000	0.608421
Evergreen	S40T50T50	T_025	40	50	50	T	0.25	10PTP	59	22	66	853	1000	0.526245
Evergreen	S40T50T50	TQ_1	40	50	50	TQ	1	BTOPA	119	335	6	540	1000	0.267454
Evergreen	S40T50T50	TQ_1	40	50	50	TQ	1	EETOD	113	210	12	665	1000	0.395507
Evergreen	S40T50T50	TQ_1	40	50	50	TQ	1	ETeSS	109	148	16	727	1000	0.483871
Evergreen	S40T50T50	TQ_1	40	50	50	TQ	1	ETrSS	105	101	20	774	1000	0.567084
Evergreen	S40T50T50	TQ_1	40	50	50	TQ	1	FC1	123	624	2	251	1000	0.0864648
Evergreen	S40T50T50	TQ_1	40	50	50	TQ	1	FC5	120	389	5	486	1000	0.222496
Evergreen	S40T50T50	TQ_1	40	50	50	TQ	1	FC10	114	248	11	627	1000	0.346784
Evergreen	S40T50T50	TQ_1	40	50	50	TQ	1	MTeSPS	109	134	16	741	1000	0.511798
Evergreen	S40T50T50	TQ_1	40	50	50	TQ	1	MTP	113	217	12	658	1000	0.385235
Evergreen	S40T50T50	TQ_1	40	50	50	TQ	1	MTrSPS	103	75	22	800	1000	0.624758
Evergreen	S40T50T50	TQ_1	40	50	50	TQ	1	10PTP	101	58	24	817	1000	0.664278
Evergreen	S40T50T50	TQ_3	40	50	50	TQ	3	BTOPA	122	447	3	428	1000	0.184413
Evergreen	S40T50T50	TQ_3	40	50	50	TQ	3	EETOD	122	382	3	493	1000	0.234592
Evergreen	S40T50T50	TQ_3	40	50	50	TQ	3	ETeSS	106	129	19	746	1000	0.508714
Evergreen	S40T50T50	TQ_3	40	50	50	TQ	3	ETrSS	107	150	18	725	1000	0.471282
Evergreen	S40T50T50	TQ_3	40	50	50	TQ	3	FC1	123	652	2	223	1000	0.0739823
Evergreen	S40T50T50	TQ_3	40	50	50	TQ	3	FC5	122	470	3	405	1000	0.168717
Evergreen	S40T50T50	TQ_3	40	50	50	TQ	3	FC10	121	367	4	508	1000	0.244399
Evergreen	S40T50T50	TQ_3	40	50	50	TQ	3	MTeSPS	107	150	18	725	1000	0.471282
Evergreen	S40T50T50	TQ_3	40	50	50	TQ	3	MTP	116	276	9	599	1000	0.319809
Evergreen	S40T50T50	TQ_3	40	50	50	TQ	3	MTrSPS	114	209	11	666	1000	0.400953
Evergreen	S40T50T50	TQ_3	40	50	50	TQ	3	10PTP	107	157	18	718	1000	0.458204
Evergreen	S40T50T50	TQ_5	40	50	50	TQ	5	BTOPA	122	494	3	381	1000	0.153322
Evergreen	S40T50T50	TQ_5	40	50	50	TQ	5	EETOD	122	448	3	427	1000	0.18371
Evergreen	S40T50T50	TQ_5	40	50	50	TQ	5	ETeSS	110	205	15	670	1000	0.391003
Evergreen	S40T50T50	TQ_5	40	50	50	TQ	5	ETrSS	108	167	17	708	1000	0.444528
Evergreen	S40T50T50	TQ_5	40	50	50	TQ	5	FC1	123	665	2	210	1000	0.0684358
Evergreen	S40T50T50	TQ_5	40	50	50	TQ	5	FC5	122	496	3	379	1000	0.152082
Evergreen	S40T50T50	TQ_5	40	50	50	TQ	5	FC10	121	405	4	470	1000	0.212705
Evergreen	S40T50T50	TQ_5	40	50	50	TQ	5	MTeSPS	111	259	14	616	1000	0.321739
Evergreen	S40T50T50	TQ_5	40	50	50	TQ	5	MTP	116	309	9	566	1000	0.28338
Evergreen	S40T50T50	TQ_5	40	50	50	TQ	5	MTrSPS	111	230	14	645	1000	0.35916
Evergreen	S40T50T50	TQ_5	40	50	50	TQ	5	10PTP	109	189	16	686	1000	0.411765
Evergreen	S40T50T50	TQ_025	40	50	50	TQ	0.25	BTOPA	112	259	13	616	1000	0.32548
Evergreen	S40T50T50	TQ_025	40	50	50	TQ	0.25	EETOD	100	78	25	797	1000	0.601547
Evergreen	S40T50T50	TQ_025	40	50	50	TQ	0.25	ETeSS	111	215	14	660	1000	0.380244
Evergreen	S40T50T50	TQ_025	40	50	50	TQ	0.25	ETrSS	91	37	34	838	1000	0.678733
Evergreen	S40T50T50	TQ_025	40	50	50	TQ	0.25	FC1	121	592	4	283	1000	0.0966275
Evergreen	S40T50T50	TQ_025	40	50	50	TQ	0.25	FC5	112	267	13	608	1000	0.315822
Evergreen	S40T50T50	TQ_025	40	50	50	TQ	0.25	FC10	106	140	19	735	1000	0.486268
Evergreen	S40T50T50	TQ_025	40	50	50	TQ	0.25	MTeSPS	111	235	14	640	1000	0.352406
Evergreen	S40T50T50	TQ_025	40	50	50	TQ	0.25	MTP	91	44	34	831	1000	0.655249
Evergreen	S40T50T50	TQ_025	40	50	50	TQ	0.25	MTrSPS	73	25	52	850	1000	0.612091
Evergreen	S40T50T50	TQ_025	40	50	50	TQ	0.25	10PTP	43	9	82	866	1000	0.445122
Evergreen	S40T70T30	Auto	40	70	30	Auto	1	BTOPA	117	261	8	614	1000	0.341493
Evergreen	S40T70T30	Auto	40	70	30	Auto	1	EETOD	105	126	20	749	1000	0.510478
Evergreen	S40T70T30	Auto	40	70	30	Auto	1	ETeSS	103	92	22	783	1000	0.579724
Evergreen	S40T70T30	Auto	40	70	30	Auto	1	ETrSS	101	74	24	801	1000	0.617561
Evergreen	S40T70T30	Auto	40	70	30	Auto	1	FC1	121	355	4	520	1000	0.255187
Evergreen	S40T70T30	Auto	40	70	30	Auto	1	FC5	114	191	11	684	1000	0.428975
Evergreen	S40T70T30	Auto	40	70	30	Auto	1	FC10	108	136	17	739	1000	0.503247
Evergreen	S40T70T30	Auto	40	70	30	Auto	1	MTeSPS	103	89	22	786	1000	0.587361
Evergreen	S40T70T30	Auto	40	70	30	Auto	1	MTP	117	251	8	624	1000	0.354115
Evergreen	S40T70T30	Auto	40	70	30	Auto	1	MTrSPS	100	71	25	804	1000	0.620928
Evergreen	S40T70T30	Auto	40	70	30	Auto	1	10PTP	101	76	24	799	1000	0.612027
Evergreen	S40T70T30	H_1	40	70	30	H	1	BTOPA	118	258	7	617	1000	0.348894
Evergreen	S40T70T30	H_1	40	70	30	H	1	EETOD	112	179	13	696	1000	0.440641
Evergreen	S40T70T30	H_1	40	70	30	H	1	ETeSS	99	82	26	793	1000	0.58581
Evergreen	S40T70T30	H_1	40	70	30	H	1	ETrSS	102	120	23	755	1000	0.509434
Evergreen	S40T70T30	H_1	40	70	30	H	1	FC1	124	629	1	246	1000	0.0866256
Evergreen	S40T70T30	H_1	40	70	30	H	1	FC5	118	279	7	596	1000	0.323477
Evergreen	S40T70T30	H_1	40	70	30	H	1	FC10	113	191	12	684	1000	0.424929
Evergreen	S40T70T30	H_1	40	70	30	H	1	MTeSPS	100	86	25	789	1000	0.58034
Evergreen	S40T70T30	H_1	40	70	30	H	1	MTP	113	203	12	672	1000	0.406077
Evergreen	S40T70T30	H_1	40	70	30	H	1	MTrSPS	101	101	24	774	1000	0.54792
Evergreen	S40T70T30	H_1	40	70	30	H	1	10PTP	106	141	19	734	1000	0.484287
Evergreen	S40T70T30	H_3	40	70	30	H	3	BTOPA	120	310	5	565	1000	0.296089
Evergreen	S40T70T30	H_3	40	70	30	H	3	EETOD	119	292	6	583	1000	0.312175
Evergreen	S40T70T30	H_3	40	70	30	H	3	ETeSS	102	127	23	748	1000	0.494524
Evergreen	S40T70T30	H_3	40	70	30	H	3	ETrSS	99	118	26	757	1000	0.499566
Evergreen	S40T70T30	H_3	40	70	30	H	3	FC1	125	663	0	212	1000	0.0740223
Evergreen	S40T70T30	H_3	40	70	30	H	3	FC5	122	386	3	489	1000	0.231225
Evergreen	S40T70T30	H_3	40	70	30	H	3	FC10	119	280	6	595	1000	0.325869
Evergreen	S40T70T30	H_3	40	70	30	H	3	MTeSPS	103	137	22	738	1000	0.478689
Evergreen	S40T70T30	H_3	40	70	30	H	3	MTP	115	212	10	663	1000	0.400405
Evergreen	S40T70T30	H_3	40	70	30	H	3	MTrSPS	102	125	23	750	1000	0.49873
Evergreen	S40T70T30	H_3	40	70	30	H	3	10PTP	106	139	19	736	1000	0.488259
Evergreen	S40T70T30	H_5	40	70	30	H	5	BTOPA	121	380	4	495	1000	0.23315
Evergreen	S40T70T30	H_5	40	70	30	H	5	EETOD	122	413	3	462	1000	0.209501
Evergreen	S40T70T30	H_5	40	70	30	H	5	ETeSS	107	170	18	705	1000	0.435011
Evergreen	S40T70T30	H_5	40	70	30	H	5	ETrSS	102	145	23	730	1000	0.458501
Evergreen	S40T70T30	H_5	40	70	30	H	5	FC1	125	755	0	120	1000	0.0382166
Evergreen	S40T70T30	H_5	40	70	30	H	5	FC5	124	513	1	362	1000	0.147242
Evergreen	S40T70T30	H_5	40	70	30	H	5	FC10	122	387	3	488	1000	0.23039
Evergreen	S40T70T30	H_5	40	70	30	H	5	MTeSPS	112	184	13	691	1000	0.432277
Evergreen	S40T70T30	H_5	40	70	30	H	5	MTP	116	232	9	643	1000	0.375648
Evergreen	S40T70T30	H_5	40	70	30	H	5	MTrSPS	112	194	13	681	1000	0.416079
Evergreen	S40T70T30	H_5	40	70	30	H	5	10PTP	112	192	13	683	1000	0.419263
Evergreen	S40T70T30	H_025	40	70	30	H	0.25	BTOPA	112	179	13	696	1000	0.440641
Evergreen	S40T70T30	H_025	40	70	30	H	0.25	EETOD	104	96	21	779	1000	0.574545
Evergreen	S40T70T30	H_025	40	70	30	H	0.25	ETeSS	102	82	23	793	1000	0.60076
Evergreen	S40T70T30	H_025	40	70	30	H	0.25	ETrSS	100	68	25	807	1000	0.629482
Evergreen	S40T70T30	H_025	40	70	30	H	0.25	FC1	119	265	6	610	1000	0.343826
Evergreen	S40T70T30	H_025	40	70	30	H	0.25	FC5	110	153	15	722	1000	0.478666
Evergreen	S40T70T30	H_025	40	70	30	H	0.25	FC10	104	102	21	773	1000	0.559928
Evergreen	S40T70T30	H_025	40	70	30	H	0.25	MTeSPS	102	79	23	796	1000	0.608821
Evergreen	S40T70T30	H_025	40	70	30	H	0.25	MTP	104	105	21	770	1000	0.552795
Evergreen	S40T70T30	H_025	40	70	30	H	0.25	MTrSPS	102	79	23	796	1000	0.608821
Evergreen	S40T70T30	H_025	40	70	30	H	0.25	10PTP	98	56	27	819	1000	0.654886
Evergreen	S40T70T30	L_1	40	70	30	L	1	BTOPA	119	279	6	596	1000	0.327037
Evergreen	S40T70T30	L_1	40	70	30	L	1	EETOD	118	233	7	642	1000	0.381842
Evergreen	S40T70T30	L_1	40	70	30	L	1	ETeSS	102	134	23	741	1000	0.480132
Evergreen	S40T70T30	L_1	40	70	30	L	1	ETrSS	102	121	23	754	1000	0.507271
Evergreen	S40T70T30	L_1	40	70	30	L	1	FC1	125	628	0	247	1000	0.0895252
Evergreen	S40T70T30	L_1	40	70	30	L	1	FC5	121	357	4	518	1000	0.253361
Evergreen	S40T70T30	L_1	40	70	30	L	1	FC10	118	240	7	635	1000	0.3723
Evergreen	S40T70T30	L_1	40	70	30	L	1	MTeSPS	108	152	17	723	1000	0.471875
Evergreen	S40T70T30	L_1	40	70	30	L	1	MTP	118	235	7	640	1000	0.379089
Evergreen	S40T70T30	L_1	40	70	30	L	1	MTrSPS	106	146	19	729	1000	0.474522
Evergreen	S40T70T30	L_1	40	70	30	L	1	10PTP	110	168	15	707	1000	0.451274
Evergreen	S40T70T30	L_3	40	70	30	L	3	BTOPA	119	303	6	572	1000	0.300113
Evergreen	S40T70T30	L_3	40	70	30	L	3	EETOD	118	267	7	608	1000	0.337764
Evergreen	S40T70T30	L_3	40	70	30	L	3	ETeSS	103	132	22	743	1000	0.488797
Evergreen	S40T70T30	L_3	40	70	30	L	3	ETrSS	103	131	22	744	1000	0.490849
Evergreen	S40T70T30	L_3	40	70	30	L	3	FC1	124	638	1	237	1000	0.0825556
Evergreen	S40T70T30	L_3	40	70	30	L	3	FC5	121	374	4	501	1000	0.238287
Evergreen	S40T70T30	L_3	40	70	30	L	3	FC10	118	265	7	610	1000	0.340206
Evergreen	S40T70T30	L_3	40	70	30	L	3	MTeSPS	108	157	17	718	1000	0.462548
Evergreen	S40T70T30	L_3	40	70	30	L	3	MTP	117	224	8	651	1000	0.390676
Evergreen	S40T70T30	L_3	40	70	30	L	3	MTrSPS	112	174	13	701	1000	0.44919
Evergreen	S40T70T30	L_3	40	70	30	L	3	10PTP	111	168	14	707	1000	0.455497
Evergreen	S40T70T30	L_5	40	70	30	L	5	BTOPA	121	361	4	514	1000	0.249743
Evergreen	S40T70T30	L_5	40	70	30	L	5	EETOD	121	341	4	534	1000	0.268293
Evergreen	S40T70T30	L_5	40	70	30	L	5	ETeSS	103	136	22	739	1000	0.48069
Evergreen	S40T70T30	L_5	40	70	30	L	5	ETrSS	105	152	20	723	1000	0.458694
Evergreen	S40T70T30	L_5	40	70	30	L	5	FC1	125	699	0	176	1000	0.0592194
Evergreen	S40T70T30	L_5	40	70	30	L	5	FC5	122	467	3	408	1000	0.17071
Evergreen	S40T70T30	L_5	40	70	30	L	5	FC10	120	338	5	537	1000	0.267876
Evergreen	S40T70T30	L_5	40	70	30	L	5	MTeSPS	111	179	14	696	1000	0.436496
Evergreen	S40T70T30	L_5	40	70	30	L	5	MTP	115	221	10	654	1000	0.387268
Evergreen	S40T70T30	L_5	40	70	30	L	5	MTrSPS	112	191	13	684	1000	0.420866
Evergreen	S40T70T30	L_5	40	70	30	L	5	10PTP	111	180	14	695	1000	0.434814
Evergreen	S40T70T30	L_025	40	70	30	L	0.25	BTOPA	118	248	7	627	1000	0.361702
Evergreen	S40T70T30	L_025	40	70	30	L	0.25	EETOD	113	201	12	674	1000	0.409154
Evergreen	S40T70T30	L_025	40	70	30	L	0.25	ETeSS	102	127	23	748	1000	0.494524
Evergreen	S40T70T30	L_025	40	70	30	L	0.25	ETrSS	102	116	23	759	1000	0.518198
Evergreen	S40T70T30	L_025	40	70	30	L	0.25	FC1	124	587	1	288	1000	0.106722
Evergreen	S40T70T30	L_025	40	70	30	L	0.25	FC5	120	322	5	553	1000	0.28368
Evergreen	S40T70T30	L_025	40	70	30	L	0.25	FC10	116	218	9	657	1000	0.395473
Evergreen	S40T70T30	L_025	40	70	30	L	0.25	MTeSPS	106	142	19	733	1000	0.482315
Evergreen	S40T70T30	L_025	40	70	30	L	0.25	MTP	114	209	11	666	1000	0.400953
Evergreen	S40T70T30	L_025	40	70	30	L	0.25	MTrSPS	109	164	16	711	1000	0.454132
Evergreen	S40T70T30	L_025	40	70	30	L	0.25	10PTP	107	146	18	729	1000	0.478952
Evergreen	S40T70T30	LQ_1	40	70	30	LQ	1	BTOPA	122	314	3	561	1000	0.298673
Evergreen	S40T70T30	LQ_1	40	70	30	LQ	1	EETOD	115	148	10	727	1000	0.509697
Evergreen	S40T70T30	LQ_1	40	70	30	LQ	1	ETeSS	106	88	19	787	1000	0.604436
Evergreen	S40T70T30	LQ_1	40	70	30	LQ	1	ETrSS	106	87	19	788	1000	0.607044
Evergreen	S40T70T30	LQ_1	40	70	30	LQ	1	FC1	123	520	2	355	1000	0.140387
Evergreen	S40T70T30	LQ_1	40	70	30	LQ	1	FC5	120	276	5	599	1000	0.334123
Evergreen	S40T70T30	LQ_1	40	70	30	LQ	1	FC10	117	174	8	701	1000	0.469774
Evergreen	S40T70T30	LQ_1	40	70	30	LQ	1	MTeSPS	105	58	20	817	1000	0.68453
Evergreen	S40T70T30	LQ_1	40	70	30	LQ	1	MTP	122	299	3	576	1000	0.314804
Evergreen	S40T70T30	LQ_1	40	70	30	LQ	1	MTrSPS	104	56	21	819	1000	0.685714
Evergreen	S40T70T30	LQ_1	40	70	30	LQ	1	10PTP	107	107	18	768	1000	0.562172
Evergreen	S40T70T30	LQ_3	40	70	30	LQ	3	BTOPA	122	435	3	440	1000	0.192999
Evergreen	S40T70T30	LQ_3	40	70	30	LQ	3	EETOD	121	270	4	605	1000	0.344889
Evergreen	S40T70T30	LQ_3	40	70	30	LQ	3	ETeSS	108	114	17	761	1000	0.5506
Evergreen	S40T70T30	LQ_3	40	70	30	LQ	3	ETrSS	107	101	18	774	1000	0.576512
Evergreen	S40T70T30	LQ_3	40	70	30	LQ	3	FC1	123	626	2	249	1000	0.0855479
Evergreen	S40T70T30	LQ_3	40	70	30	LQ	3	FC5	122	415	3	460	1000	0.207958
Evergreen	S40T70T30	LQ_3	40	70	30	LQ	3	FC10	121	280	4	595	1000	0.332942
Evergreen	S40T70T30	LQ_3	40	70	30	LQ	3	MTeSPS	105	91	20	784	1000	0.591912
Evergreen	S40T70T30	LQ_3	40	70	30	LQ	3	MTP	122	364	3	511	1000	0.250255
Evergreen	S40T70T30	LQ_3	40	70	30	LQ	3	MTrSPS	108	119	17	756	1000	0.539373
Evergreen	S40T70T30	LQ_3	40	70	30	LQ	3	10PTP	108	117	17	758	1000	0.54383
Evergreen	S40T70T30	LQ_5	40	70	30	LQ	5	BTOPA	122	418	3	457	1000	0.20566
Evergreen	S40T70T30	LQ_5	40	70	30	LQ	5	EETOD	121	339	4	536	1000	0.270213
Evergreen	S40T70T30	LQ_5	40	70	30	LQ	5	ETeSS	107	121	18	754	1000	0.530405
Evergreen	S40T70T30	LQ_5	40	70	30	LQ	5	ETrSS	107	118	18	757	1000	0.537021
Evergreen	S40T70T30	LQ_5	40	70	30	LQ	5	FC1	124	680	1	195	1000	0.0645604
Evergreen	S40T70T30	LQ_5	40	70	30	LQ	5	FC5	122	474	3	401	1000	0.166084
Evergreen	S40T70T30	LQ_5	40	70	30	LQ	5	FC10	121	348	4	527	1000	0.261668
Evergreen	S40T70T30	LQ_5	40	70	30	LQ	5	MTeSPS	111	156	14	719	1000	0.477325
Evergreen	S40T70T30	LQ_5	40	70	30	LQ	5	MTP	122	401	3	474	1000	0.218946
Evergreen	S40T70T30	LQ_5	40	70	30	LQ	5	MTrSPS	108	140	17	735	1000	0.495177
Evergreen	S40T70T30	LQ_5	40	70	30	LQ	5	10PTP	107	137	18	738	1000	0.496753
Evergreen	S40T70T30	LQ_025	40	70	30	LQ	0.25	BTOPA	119	209	6	666	1000	0.420485
Evergreen	S40T70T30	LQ_025	40	70	30	LQ	0.25	EETOD	109	98	16	777	1000	0.59322
Evergreen	S40T70T30	LQ_025	40	70	30	LQ	0.25	ETeSS	106	70	19	805	1000	0.653696
Evergreen	S40T70T30	LQ_025	40	70	30	LQ	0.25	ETrSS	105	56	20	819	1000	0.690743
Evergreen	S40T70T30	LQ_025	40	70	30	LQ	0.25	FC1	121	277	4	598	1000	0.336482
Evergreen	S40T70T30	LQ_025	40	70	30	LQ	0.25	FC5	117	146	8	729	1000	0.52211
Evergreen	S40T70T30	LQ_025	40	70	30	LQ	0.25	FC10	109	98	16	777	1000	0.59322
Evergreen	S40T70T30	LQ_025	40	70	30	LQ	0.25	MTeSPS	106	69	19	806	1000	0.656585
Evergreen	S40T70T30	LQ_025	40	70	30	LQ	0.25	MTP	118	177	7	698	1000	0.468592
Evergreen	S40T70T30	LQ_025	40	70	30	LQ	0.25	MTrSPS	105	63	20	812	1000	0.669323
Evergreen	S40T70T30	LQ_025	40	70	30	LQ	0.25	10PTP	105	66	20	809	1000	0.660415
Evergreen	S40T70T30	LQP_1	40	70	30	LQP	1	BTOPA	118	220	7	655	1000	0.400264
Evergreen	S40T70T30	LQP_1	40	70	30	LQP	1	EETOD	111	139	14	736	1000	0.5104
Evergreen	S40T70T30	LQP_1	40	70	30	LQP	1	ETeSS	103	59	22	816	1000	0.6714
Evergreen	S40T70T30	LQP_1	40	70	30	LQP	1	ETrSS	103	62	22	813	1000	0.662312
Evergreen	S40T70T30	LQP_1	40	70	30	LQP	1	FC1	119	295	6	580	1000	0.30884
Evergreen	S40T70T30	LQP_1	40	70	30	LQP	1	FC5	116	181	9	694	1000	0.45363
Evergreen	S40T70T30	LQP_1	40	70	30	LQP	1	FC10	110	125	15	750	1000	0.53527
Evergreen	S40T70T30	LQP_1	40	70	30	LQP	1	MTeSPS	103	66	22	809	1000	0.650447
Evergreen	S40T70T30	LQP_1	40	70	30	LQP	1	MTP	112	167	13	708	1000	0.461481
Evergreen	S40T70T30	LQP_1	40	70	30	LQP	1	MTrSPS	105	90	20	785	1000	0.59447
Evergreen	S40T70T30	LQP_1	40	70	30	LQP	1	10PTP	107	93	18	782	1000	0.596364
Evergreen	S40T70T30	LQP_3	40	70	30	LQP	3	BTOPA	118	301	7	574	1000	0.298805
Evergreen	S40T70T30	LQP_3	40	70	30	LQP	3	EETOD	118	259	7	616	1000	0.347639
Evergreen	S40T70T30	LQP_3	40	70	30	LQP	3	ETeSS	101	88	24	787	1000	0.580131
Evergreen	S40T70T30	LQP_3	40	70	30	LQP	3	ETrSS	101	75	24	800	1000	0.614786
Evergreen	S40T70T30	LQP_3	40	70	30	LQP	3	FC1	122	412	3	463	1000	0.210276
Evergreen	S40T70T30	LQP_3	40	70	30	LQP	3	FC5	118	282	7	593	1000	0.32
Evergreen	S40T70T30	LQP_3	40	70	30	LQP	3	FC10	114	211	11	664	1000	0.397966
Evergreen	S40T70T30	LQP_3	40	70	30	LQP	3	MTeSPS	102	104	23	771	1000	0.545617
Evergreen	S40T70T30	LQP_3	40	70	30	LQP	3	MTP	117	235	8	640	1000	0.375321
Evergreen	S40T70T30	LQP_3	40	70	30	LQP	3	MTrSPS	101	85	24	790	1000	0.587902
Evergreen	S40T70T30	LQP_3	40	70	30	LQP	3	10PTP	102	109	23	766	1000	0.533981
Evergreen	S40T70T30	LQP_5	40	70	30	LQP	5	BTOPA	121	356	4	519	1000	0.254272
Evergreen	S40T70T30	LQP_5	40	70	30	LQP	5	EETOD	120	328	5	547	1000	0.277657
Evergreen	S40T70T30	LQP_5	40	70	30	LQP	5	ETeSS	101	105	24	770	1000	0.538462
Evergreen	S40T70T30	LQP_5	40	70	30	LQP	5	ETrSS	101	103	24	772	1000	0.543165
Evergreen	S40T70T30	LQP_5	40	70	30	LQP	5	FC1	122	545	3	330	1000	0.123551
Evergreen	S40T70T30	LQP_5	40	70	30	LQP	5	FC5	121	356	4	519	1000	0.254272
Evergreen	S40T70T30	LQP_5	40	70	30	LQP	5	FC10	118	280	7	595	1000	0.322314
Evergreen	S40T70T30	LQP_5	40	70	30	LQP	5	MTeSPS	101	105	24	770	1000	0.538462
Evergreen	S40T70T30	LQP_5	40	70	30	LQP	5	MTP	113	200	12	675	1000	0.410702
Evergreen	S40T70T30	LQP_5	40	70	30	LQP	5	MTrSPS	106	139	19	736	1000	0.488259
Evergreen	S40T70T30	LQP_5	40	70	30	LQP	5	10PTP	104	131	21	744	1000	0.495436
Evergreen	S40T70T30	LQP_025	40	70	30	LQP	0.25	BTOPA	116	177	9	698	1000	0.460479
Evergreen	S40T70T30	LQP_025	40	70	30	LQP	0.25	EETOD	106	78	19	797	1000	0.631179
Evergreen	S40T70T30	LQP_025	40	70	30	LQP	0.25	ETeSS	105	69	20	806	1000	0.651663
Evergreen	S40T70T30	LQP_025	40	70	30	LQP	0.25	ETrSS	104	50	21	825	1000	0.704782
Evergreen	S40T70T30	LQP_025	40	70	30	LQP	0.25	FC1	118	224	7	651	1000	0.394495
Evergreen	S40T70T30	LQP_025	40	70	30	LQP	0.25	FC5	114	121	11	754	1000	0.561826
Evergreen	S40T70T30	LQP_025	40	70	30	LQP	0.25	FC10	106	82	19	793	1000	0.620301
Evergreen	S40T70T30	LQP_025	40	70	30	LQP	0.25	MTeSPS	106	80	19	795	1000	0.625709
Evergreen	S40T70T30	LQP_025	40	70	30	LQP	0.25	MTP	115	157	10	718	1000	0.492401
Evergreen	S40T70T30	LQP_025	40	70	30	LQP	0.25	MTrSPS	104	55	21	820	1000	0.688843
Evergreen	S40T70T30	LQP_025	40	70	30	LQP	0.25	10PTP	104	52	21	823	1000	0.698347
Evergreen	S40T70T30	LQPT_1	40	70	30	LQPT	1	BTOPA	115	224	10	651	1000	0.382993
Evergreen	S40T70T30	LQPT_1	40	70	30	LQPT	1	EETOD	108	133	17	742	1000	0.509403
Evergreen	S40T70T30	LQPT_1	40	70	30	LQPT	1	ETeSS	106	121	19	754	1000	0.525826
Evergreen	S40T70T30	LQPT_1	40	70	30	LQPT	1	ETrSS	103	74	22	801	1000	0.627546
Evergreen	S40T70T30	LQPT_1	40	70	30	LQPT	1	FC1	121	376	4	499	1000	0.236565
Evergreen	S40T70T30	LQPT_1	40	70	30	LQPT	1	FC5	114	207	11	668	1000	0.403964
Evergreen	S40T70T30	LQPT_1	40	70	30	LQPT	1	FC10	109	145	16	730	1000	0.489699
Evergreen	S40T70T30	LQPT_1	40	70	30	LQPT	1	MTeSPS	109	145	16	730	1000	0.489699
Evergreen	S40T70T30	LQPT_1	40	70	30	LQPT	1	MTP	106	108	19	767	1000	0.555166
Evergreen	S40T70T30	LQPT_1	40	70	30	LQPT	1	MTrSPS	106	108	19	767	1000	0.555166
Evergreen	S40T70T30	LQPT_1	40	70	30	LQPT	1	10PTP	103	74	22	801	1000	0.627546
Evergreen	S40T70T30	LQPT_3	40	70	30	LQPT	3	BTOPA	121	311	4	564	1000	0.298441
Evergreen	S40T70T30	LQPT_3	40	70	30	LQPT	3	EETOD	117	233	8	642	1000	0.378065
Evergreen	S40T70T30	LQPT_3	40	70	30	LQPT	3	ETeSS	106	95	19	780	1000	0.586582
Evergreen	S40T70T30	LQPT_3	40	70	30	LQPT	3	ETrSS	102	73	23	802	1000	0.625366
Evergreen	S40T70T30	LQPT_3	40	70	30	LQPT	3	FC1	122	425	3	450	1000	0.200374
Evergreen	S40T70T30	LQPT_3	40	70	30	LQPT	3	FC5	117	282	8	593	1000	0.316441
Evergreen	S40T70T30	LQPT_3	40	70	30	LQPT	3	FC10	114	208	11	667	1000	0.402456
Evergreen	S40T70T30	LQPT_3	40	70	30	LQPT	3	MTeSPS	105	85	20	790	1000	0.607477
Evergreen	S40T70T30	LQPT_3	40	70	30	LQPT	3	MTP	111	167	14	708	1000	0.457271
Evergreen	S40T70T30	LQPT_3	40	70	30	LQPT	3	MTrSPS	107	108	18	767	1000	0.559825
Evergreen	S40T70T30	LQPT_3	40	70	30	LQPT	3	10PTP	107	110	18	765	1000	0.555169
Evergreen	S40T70T30	LQPT_5	40	70	30	LQPT	5	BTOPA	121	364	4	511	1000	0.247059
Evergreen	S40T70T30	LQPT_5	40	70	30	LQPT	5	EETOD	121	339	4	536	1000	0.270213
Evergreen	S40T70T30	LQPT_5	40	70	30	LQPT	5	ETeSS	101	80	24	795	1000	0.601151
Evergreen	S40T70T30	LQPT_5	40	70	30	LQPT	5	ETrSS	101	88	24	787	1000	0.580131
Evergreen	S40T70T30	LQPT_5	40	70	30	LQPT	5	FC1	122	545	3	330	1000	0.123551
Evergreen	S40T70T30	LQPT_5	40	70	30	LQPT	5	FC5	121	365	4	510	1000	0.24617
Evergreen	S40T70T30	LQPT_5	40	70	30	LQPT	5	FC10	118	285	7	590	1000	0.316559
Evergreen	S40T70T30	LQPT_5	40	70	30	LQPT	5	MTeSPS	98	67	27	808	1000	0.622111
Evergreen	S40T70T30	LQPT_5	40	70	30	LQPT	5	MTP	112	190	13	685	1000	0.422475
Evergreen	S40T70T30	LQPT_5	40	70	30	LQPT	5	MTrSPS	105	137	20	738	1000	0.487765
Evergreen	S40T70T30	LQPT_5	40	70	30	LQPT	5	10PTP	106	151	19	724	1000	0.464988
Evergreen	S40T70T30	LQPT_025	40	70	30	LQPT	0.25	BTOPA	109	213	16	662	1000	0.375171
Evergreen	S40T70T30	LQPT_025	40	70	30	LQPT	0.25	EETOD	97	64	28	811	1000	0.625636
Evergreen	S40T70T30	LQPT_025	40	70	30	LQPT	0.25	ETeSS	111	257	14	618	1000	0.32419
Evergreen	S40T70T30	LQPT_025	40	70	30	LQPT	0.25	ETrSS	88	39	37	836	1000	0.654938
Evergreen	S40T70T30	LQPT_025	40	70	30	LQPT	0.25	FC1	117	504	8	371	1000	0.133305
Evergreen	S40T70T30	LQPT_025	40	70	30	LQPT	0.25	FC5	108	196	17	679	1000	0.396601
Evergreen	S40T70T30	LQPT_025	40	70	30	LQPT	0.25	FC10	102	94	23	781	1000	0.569853
Evergreen	S40T70T30	LQPT_025	40	70	30	LQPT	0.25	MTeSPS	108	132	17	743	1000	0.511475
Evergreen	S40T70T30	LQPT_025	40	70	30	LQPT	0.25	MTP	94	51	31	824	1000	0.649198
Evergreen	S40T70T30	LQPT_025	40	70	30	LQPT	0.25	MTrSPS	86	35	39	840	1000	0.65701
Evergreen	S40T70T30	LQPT_025	40	70	30	LQPT	0.25	10PTP	70	11	55	864	1000	0.644684
Evergreen	S40T70T30	LQPTH_1	40	70	30	LQPTH	1	BTOPA	115	214	10	661	1000	0.397445
Evergreen	S40T70T30	LQPTH_1	40	70	30	LQPTH	1	EETOD	110	133	15	742	1000	0.518308
Evergreen	S40T70T30	LQPTH_1	40	70	30	LQPTH	1	ETeSS	102	105	23	770	1000	0.543265
Evergreen	S40T70T30	LQPTH_1	40	70	30	LQPTH	1	ETrSS	101	76	24	799	1000	0.612027
Evergreen	S40T70T30	LQPTH_1	40	70	30	LQPTH	1	FC1	121	430	4	445	1000	0.193683
Evergreen	S40T70T30	LQPTH_1	40	70	30	LQPTH	1	FC5	115	212	10	663	1000	0.400405
Evergreen	S40T70T30	LQPTH_1	40	70	30	LQPTH	1	FC10	110	147	15	728	1000	0.490165
Evergreen	S40T70T30	LQPTH_1	40	70	30	LQPTH	1	MTeSPS	102	105	23	770	1000	0.543265
Evergreen	S40T70T30	LQPTH_1	40	70	30	LQPTH	1	MTP	110	144	15	731	1000	0.496038
Evergreen	S40T70T30	LQPTH_1	40	70	30	LQPTH	1	MTrSPS	102	105	23	770	1000	0.543265
Evergreen	S40T70T30	LQPTH_1	40	70	30	LQPTH	1	10PTP	101	71	24	804	1000	0.625984
Evergreen	S40T70T30	LQPTH_3	40	70	30	LQPTH	3	BTOPA	120	318	5	557	1000	0.287762
Evergreen	S40T70T30	LQPTH_3	40	70	30	LQPTH	3	EETOD	117	247	8	628	1000	0.359296
Evergreen	S40T70T30	LQPTH_3	40	70	30	LQPTH	3	ETeSS	101	91	24	784	1000	0.572491
Evergreen	S40T70T30	LQPTH_3	40	70	30	LQPTH	3	ETrSS	101	85	24	790	1000	0.587902
Evergreen	S40T70T30	LQPTH_3	40	70	30	LQPTH	3	FC1	122	437	3	438	1000	0.191548
Evergreen	S40T70T30	LQPTH_3	40	70	30	LQPTH	3	FC5	119	301	6	574	1000	0.302273
Evergreen	S40T70T30	LQPTH_3	40	70	30	LQPTH	3	FC10	115	227	10	648	1000	0.378768
Evergreen	S40T70T30	LQPTH_3	40	70	30	LQPTH	3	MTeSPS	101	100	24	775	1000	0.550317
Evergreen	S40T70T30	LQPTH_3	40	70	30	LQPTH	3	MTP	114	211	11	664	1000	0.397966
Evergreen	S40T70T30	LQPTH_3	40	70	30	LQPTH	3	MTrSPS	108	126	17	749	1000	0.524126
Evergreen	S40T70T30	LQPTH_3	40	70	30	LQPTH	3	10PTP	102	102	23	773	1000	0.55036
Evergreen	S40T70T30	LQPTH_5	40	70	30	LQPTH	5	BTOPA	121	397	4	478	1000	0.219085
Evergreen	S40T70T30	LQPTH_5	40	70	30	LQPTH	5	EETOD	121	339	4	536	1000	0.270213
Evergreen	S40T70T30	LQPTH_5	40	70	30	LQPTH	5	ETeSS	102	114	23	761	1000	0.522648
Evergreen	S40T70T30	LQPTH_5	40	70	30	LQPTH	5	ETrSS	102	72	23	803	1000	0.62818
Evergreen	S40T70T30	LQPTH_5	40	70	30	LQPTH	5	FC1	122	542	3	333	1000	0.125201
Evergreen	S40T70T30	LQPTH_5	40	70	30	LQPTH	5	FC5	121	381	4	494	1000	0.232303
Evergreen	S40T70T30	LQPTH_5	40	70	30	LQPTH	5	FC10	118	303	7	572	1000	0.296653
Evergreen	S40T70T30	LQPTH_5	40	70	30	LQPTH	5	MTeSPS	102	74	23	801	1000	0.622568
Evergreen	S40T70T30	LQPTH_5	40	70	30	LQPTH	5	MTP	111	202	14	673	1000	0.399583
Evergreen	S40T70T30	LQPTH_5	40	70	30	LQPTH	5	MTrSPS	102	83	23	792	1000	0.598104
Evergreen	S40T70T30	LQPTH_5	40	70	30	LQPTH	5	10PTP	102	104	23	771	1000	0.545617
Evergreen	S40T70T30	LQPTH_025	40	70	30	LQPTH	0.25	BTOPA	108	158	17	717	1000	0.460709
Evergreen	S40T70T30	LQPTH_025	40	70	30	LQPTH	0.25	EETOD	96	56	29	819	1000	0.644351
Evergreen	S40T70T30	LQPTH_025	40	70	30	LQPTH	0.25	ETeSS	108	159	17	716	1000	0.458878
Evergreen	S40T70T30	LQPTH_025	40	70	30	LQPTH	0.25	ETrSS	71	22	54	853	1000	0.609756
Evergreen	S40T70T30	LQPTH_025	40	70	30	LQPTH	0.25	FC1	116	261	9	614	1000	0.33783
Evergreen	S40T70T30	LQPTH_025	40	70	30	LQPTH	0.25	FC5	105	124	20	751	1000	0.514743
Evergreen	S40T70T30	LQPTH_025	40	70	30	LQPTH	0.25	FC10	101	75	24	800	1000	0.614786
Evergreen	S40T70T30	LQPTH_025	40	70	30	LQPTH	0.25	MTeSPS	105	121	20	754	1000	0.521222
Evergreen	S40T70T30	LQPTH_025	40	70	30	LQPTH	0.25	MTP	71	23	54	852	1000	0.606138
Evergreen	S40T70T30	LQPTH_025	40	70	30	LQPTH	0.25	MTrSPS	67	16	58	859	1000	0.604806
Evergreen	S40T70T30	LQPTH_025	40	70	30	LQPTH	0.25	10PTP	46	8	79	867	1000	0.47432
Evergreen	S40T70T30	PT_1	40	70	30	PT	1	BTOPA	114	230	11	645	1000	0.370757
Evergreen	S40T70T30	PT_1	40	70	30	PT	1	EETOD	109	156	16	719	1000	0.468726
Evergreen	S40T70T30	PT_1	40	70	30	PT	1	ETeSS	103	117	22	758	1000	0.52069
Evergreen	S40T70T30	PT_1	40	70	30	PT	1	ETrSS	103	92	22	783	1000	0.579724
Evergreen	S40T70T30	PT_1	40	70	30	PT	1	FC1	121	374	4	501	1000	0.238287
Evergreen	S40T70T30	PT_1	40	70	30	PT	1	FC5	114	220	11	655	1000	0.38482
Evergreen	S40T70T30	PT_1	40	70	30	PT	1	FC10	111	161	14	714	1000	0.468085
Evergreen	S40T70T30	PT_1	40	70	30	PT	1	MTeSPS	103	120	22	755	1000	0.514115
Evergreen	S40T70T30	PT_1	40	70	30	PT	1	MTP	103	116	22	759	1000	0.522904
Evergreen	S40T70T30	PT_1	40	70	30	PT	1	MTrSPS	103	116	22	759	1000	0.522904
Evergreen	S40T70T30	PT_1	40	70	30	PT	1	10PTP	102	87	23	788	1000	0.587629
Evergreen	S40T70T30	PT_3	40	70	30	PT	3	BTOPA	118	292	7	583	1000	0.308671
Evergreen	S40T70T30	PT_3	40	70	30	PT	3	EETOD	115	242	10	633	1000	0.35837
Evergreen	S40T70T30	PT_3	40	70	30	PT	3	ETeSS	102	115	23	760	1000	0.520417
Evergreen	S40T70T30	PT_3	40	70	30	PT	3	ETrSS	98	80	27	795	1000	0.586074
Evergreen	S40T70T30	PT_3	40	70	30	PT	3	FC1	121	425	4	450	1000	0.197381
Evergreen	S40T70T30	PT_3	40	70	30	PT	3	FC5	117	271	8	604	1000	0.329327
Evergreen	S40T70T30	PT_3	40	70	30	PT	3	FC10	113	203	12	672	1000	0.406077
Evergreen	S40T70T30	PT_3	40	70	30	PT	3	MTeSPS	102	98	23	777	1000	0.56
Evergreen	S40T70T30	PT_3	40	70	30	PT	3	MTP	104	139	21	736	1000	0.479251
Evergreen	S40T70T30	PT_3	40	70	30	PT	3	MTrSPS	99	87	26	788	1000	0.572779
Evergreen	S40T70T30	PT_3	40	70	30	PT	3	10PTP	98	86	27	789	1000	0.570342
Evergreen	S40T70T30	PT_5	40	70	30	PT	5	BTOPA	120	365	5	510	1000	0.242967
Evergreen	S40T70T30	PT_5	40	70	30	PT	5	EETOD	120	347	5	528	1000	0.259337
Evergreen	S40T70T30	PT_5	40	70	30	PT	5	ETeSS	100	104	25	771	1000	0.535971
Evergreen	S40T70T30	PT_5	40	70	30	PT	5	ETrSS	98	96	27	779	1000	0.545287
Evergreen	S40T70T30	PT_5	40	70	30	PT	5	FC1	122	537	3	338	1000	0.127977
Evergreen	S40T70T30	PT_5	40	70	30	PT	5	FC5	121	368	4	507	1000	0.243518
Evergreen	S40T70T30	PT_5	40	70	30	PT	5	FC10	118	286	7	589	1000	0.315421
Evergreen	S40T70T30	PT_5	40	70	30	PT	5	MTeSPS	100	103	25	772	1000	0.538323
Evergreen	S40T70T30	PT_5	40	70	30	PT	5	MTP	111	193	14	682	1000	0.413598
Evergreen	S40T70T30	PT_5	40	70	30	PT	5	MTrSPS	104	110	21	765	1000	0.541156
Evergreen	S40T70T30	PT_5	40	70	30	PT	5	10PTP	104	117	21	758	1000	0.525365
Evergreen	S40T70T30	PT_025	40	70	30	PT	0.25	BTOPA	108	189	17	686	1000	0.40762
Evergreen	S40T70T30	PT_025	40	70	30	PT	0.25	EETOD	96	60	29	815	1000	0.632231
Evergreen	S40T70T30	PT_025	40	70	30	PT	0.25	ETeSS	112	242	13	633	1000	0.346991
Evergreen	S40T70T30	PT_025	40	70	30	PT	0.25	ETrSS	91	43	34	832	1000	0.658537
Evergreen	S40T70T30	PT_025	40	70	30	PT	0.25	FC1	115	482	10	393	1000	0.140986
Evergreen	S40T70T30	PT_025	40	70	30	PT	0.25	FC5	108	169	17	706	1000	0.441022
Evergreen	S40T70T30	PT_025	40	70	30	PT	0.25	FC10	103	93	22	782	1000	0.577206
Evergreen	S40T70T30	PT_025	40	70	30	PT	0.25	MTeSPS	108	162	17	713	1000	0.453435
Evergreen	S40T70T30	PT_025	40	70	30	PT	0.25	MTP	91	45	34	830	1000	0.651982
Evergreen	S40T70T30	PT_025	40	70	30	PT	0.25	MTrSPS	91	45	34	830	1000	0.651982
Evergreen	S40T70T30	PT_025	40	70	30	PT	0.25	10PTP	75	19	50	856	1000	0.647059
Evergreen	S40T70T30	Q_1	40	70	30	Q	1	BTOPA	122	556	3	319	1000	0.117601
Evergreen	S40T70T30	Q_1	40	70	30	Q	1	EETOD	120	338	5	537	1000	0.267876
Evergreen	S40T70T30	Q_1	40	70	30	Q	1	ETeSS	102	113	23	762	1000	0.524891
Evergreen	S40T70T30	Q_1	40	70	30	Q	1	ETrSS	109	158	16	717	1000	0.465027
Evergreen	S40T70T30	Q_1	40	70	30	Q	1	FC1	123	659	2	216	1000	0.0709768
Evergreen	S40T70T30	Q_1	40	70	30	Q	1	FC5	122	485	3	390	1000	0.158983
Evergreen	S40T70T30	Q_1	40	70	30	Q	1	FC10	120	366	5	509	1000	0.242084
Evergreen	S40T70T30	Q_1	40	70	30	Q	1	MTeSPS	102	103	23	772	1000	0.547982
Evergreen	S40T70T30	Q_1	40	70	30	Q	1	MTP	122	556	3	319	1000	0.117601
Evergreen	S40T70T30	Q_1	40	70	30	Q	1	MTrSPS	113	217	12	658	1000	0.385235
Evergreen	S40T70T30	Q_1	40	70	30	Q	1	10PTP	112	210	13	665	1000	0.391542
Evergreen	S40T70T30	Q_3	40	70	30	Q	3	BTOPA	122	494	3	381	1000	0.153322
Evergreen	S40T70T30	Q_3	40	70	30	Q	3	EETOD	119	375	6	500	1000	0.23108
Evergreen	S40T70T30	Q_3	40	70	30	Q	3	ETeSS	102	124	23	751	1000	0.500849
Evergreen	S40T70T30	Q_3	40	70	30	Q	3	ETrSS	108	162	17	713	1000	0.453435
Evergreen	S40T70T30	Q_3	40	70	30	Q	3	FC1	123	650	2	225	1000	0.0748492
Evergreen	S40T70T30	Q_3	40	70	30	Q	3	FC5	122	483	3	392	1000	0.160259
Evergreen	S40T70T30	Q_3	40	70	30	Q	3	FC10	120	376	5	499	1000	0.2334
Evergreen	S40T70T30	Q_3	40	70	30	Q	3	MTeSPS	108	158	17	717	1000	0.460709
Evergreen	S40T70T30	Q_3	40	70	30	Q	3	MTP	122	478	3	397	1000	0.163478
Evergreen	S40T70T30	Q_3	40	70	30	Q	3	MTrSPS	115	231	10	644	1000	0.373212
Evergreen	S40T70T30	Q_3	40	70	30	Q	3	10PTP	112	200	13	675	1000	0.406685
Evergreen	S40T70T30	Q_5	40	70	30	Q	5	BTOPA	122	486	3	389	1000	0.158348
Evergreen	S40T70T30	Q_5	40	70	30	Q	5	EETOD	122	396	3	479	1000	0.22298
Evergreen	S40T70T30	Q_5	40	70	30	Q	5	ETeSS	108	166	17	709	1000	0.446293
Evergreen	S40T70T30	Q_5	40	70	30	Q	5	ETrSS	108	156	17	719	1000	0.464396
Evergreen	S40T70T30	Q_5	40	70	30	Q	5	FC1	123	671	2	204	1000	0.0659264
Evergreen	S40T70T30	Q_5	40	70	30	Q	5	FC5	122	508	3	367	1000	0.14477
Evergreen	S40T70T30	Q_5	40	70	30	Q	5	FC10	122	400	3	475	1000	0.219748
Evergreen	S40T70T30	Q_5	40	70	30	Q	5	MTeSPS	113	215	12	660	1000	0.38814
Evergreen	S40T70T30	Q_5	40	70	30	Q	5	MTP	119	386	6	489	1000	0.221836
Evergreen	S40T70T30	Q_5	40	70	30	Q	5	MTrSPS	114	218	11	657	1000	0.387701
Evergreen	S40T70T30	Q_5	40	70	30	Q	5	10PTP	110	191	15	684	1000	0.412687
Evergreen	S40T70T30	Q_025	40	70	30	Q	0.25	BTOPA	124	666	1	209	1000	0.0703833
Evergreen	S40T70T30	Q_025	40	70	30	Q	0.25	EETOD	119	375	6	500	1000	0.23108
Evergreen	S40T70T30	Q_025	40	70	30	Q	0.25	ETeSS	107	165	18	710	1000	0.443769
Evergreen	S40T70T30	Q_025	40	70	30	Q	0.25	ETrSS	110	193	15	682	1000	0.40951
Evergreen	S40T70T30	Q_025	40	70	30	Q	0.25	FC1	124	736	1	139	1000	0.0428571
Evergreen	S40T70T30	Q_025	40	70	30	Q	0.25	FC5	123	604	2	271	1000	0.0958598
Evergreen	S40T70T30	Q_025	40	70	30	Q	0.25	FC10	121	481	4	394	1000	0.158716
Evergreen	S40T70T30	Q_025	40	70	30	Q	0.25	MTeSPS	108	170	17	705	1000	0.43928
Evergreen	S40T70T30	Q_025	40	70	30	Q	0.25	MTP	123	656	2	219	1000	0.0722594
Evergreen	S40T70T30	Q_025	40	70	30	Q	0.25	MTrSPS	112	243	13	632	1000	0.345687
Evergreen	S40T70T30	Q_025	40	70	30	Q	0.25	10PTP	117	287	8	588	1000	0.310748
Evergreen	S40T70T30	QH_1	40	70	30	QH	1	BTOPA	119	262	6	613	1000	0.347535
Evergreen	S40T70T30	QH_1	40	70	30	QH	1	EETOD	109	123	16	752	1000	0.535117
Evergreen	S40T70T30	QH_1	40	70	30	QH	1	ETeSS	104	99	21	776	1000	0.567178
Evergreen	S40T70T30	QH_1	40	70	30	QH	1	ETrSS	100	66	25	809	1000	0.635271
Evergreen	S40T70T30	QH_1	40	70	30	QH	1	FC1	122	422	3	453	1000	0.202627
Evergreen	S40T70T30	QH_1	40	70	30	QH	1	FC5	116	207	9	668	1000	0.411845
Evergreen	S40T70T30	QH_1	40	70	30	QH	1	FC10	110	132	15	743	1000	0.520392
Evergreen	S40T70T30	QH_1	40	70	30	QH	1	MTeSPS	106	108	19	767	1000	0.555166
Evergreen	S40T70T30	QH_1	40	70	30	QH	1	MTP	116	224	9	651	1000	0.386842
Evergreen	S40T70T30	QH_1	40	70	30	QH	1	MTrSPS	101	74	24	801	1000	0.617561
Evergreen	S40T70T30	QH_1	40	70	30	QH	1	10PTP	100	66	25	809	1000	0.635271
Evergreen	S40T70T30	QH_3	40	70	30	QH	3	BTOPA	122	389	3	486	1000	0.228726
Evergreen	S40T70T30	QH_3	40	70	30	QH	3	EETOD	117	269	8	606	1000	0.331725
Evergreen	S40T70T30	QH_3	40	70	30	QH	3	ETeSS	108	131	17	744	1000	0.513558
Evergreen	S40T70T30	QH_3	40	70	30	QH	3	ETrSS	105	103	20	772	1000	0.562278
Evergreen	S40T70T30	QH_3	40	70	30	QH	3	FC1	122	521	3	354	1000	0.137093
Evergreen	S40T70T30	QH_3	40	70	30	QH	3	FC5	121	355	4	520	1000	0.255187
Evergreen	S40T70T30	QH_3	40	70	30	QH	3	FC10	117	274	8	601	1000	0.325762
Evergreen	S40T70T30	QH_3	40	70	30	QH	3	MTeSPS	107	116	18	759	1000	0.541488
Evergreen	S40T70T30	QH_3	40	70	30	QH	3	MTP	117	285	8	590	1000	0.313013
Evergreen	S40T70T30	QH_3	40	70	30	QH	3	MTrSPS	111	149	14	726	1000	0.490625
Evergreen	S40T70T30	QH_3	40	70	30	QH	3	10PTP	107	110	18	765	1000	0.555169
Evergreen	S40T70T30	QH_5	40	70	30	QH	5	BTOPA	122	427	3	448	1000	0.198882
Evergreen	S40T70T30	QH_5	40	70	30	QH	5	EETOD	119	341	6	534	1000	0.261702
Evergreen	S40T70T30	QH_5	40	70	30	QH	5	ETeSS	105	140	20	735	1000	0.481781
Evergreen	S40T70T30	QH_5	40	70	30	QH	5	ETrSS	103	106	22	769	1000	0.545697
Evergreen	S40T70T30	QH_5	40	70	30	QH	5	FC1	122	574	3	301	1000	0.108192
Evergreen	S40T70T30	QH_5	40	70	30	QH	5	FC5	122	418	3	457	1000	0.20566
Evergreen	S40T70T30	QH_5	40	70	30	QH	5	FC10	118	326	7	549	1000	0.272926
Evergreen	S40T70T30	QH_5	40	70	30	QH	5	MTeSPS	109	165	16	710	1000	0.452345
Evergreen	S40T70T30	QH_5	40	70	30	QH	5	MTP	122	404	3	471	1000	0.216554
Evergreen	S40T70T30	QH_5	40	70	30	QH	5	MTrSPS	105	140	20	735	1000	0.481781
Evergreen	S40T70T30	QH_5	40	70	30	QH	5	10PTP	105	132	20	743	1000	0.497936
Evergreen	S40T70T30	QH_025	40	70	30	QH	0.25	BTOPA	112	157	13	718	1000	0.479725
Evergreen	S40T70T30	QH_025	40	70	30	QH	0.25	EETOD	98	61	27	814	1000	0.639713
Evergreen	S40T70T30	QH_025	40	70	30	QH	0.25	ETeSS	104	105	21	770	1000	0.552795
Evergreen	S40T70T30	QH_025	40	70	30	QH	0.25	ETrSS	97	44	28	831	1000	0.687974
Evergreen	S40T70T30	QH_025	40	70	30	QH	0.25	FC1	116	238	9	637	1000	0.367478
Evergreen	S40T70T30	QH_025	40	70	30	QH	0.25	FC5	105	122	20	753	1000	0.519052
Evergreen	S40T70T30	QH_025	40	70	30	QH	0.25	FC10	100	78	25	797	1000	0.601547
Evergreen	S40T70T30	QH_025	40	70	30	QH	0.25	MTeSPS	104	105	21	770	1000	0.552795
Evergreen	S40T70T30	QH_025	40	70	30	QH	0.25	MTP	104	100	21	775	1000	0.564748
Evergreen	S40T70T30	QH_025	40	70	30	QH	0.25	MTrSPS	98	59	27	816	1000	0.645726
Evergreen	S40T70T30	QH_025	40	70	30	QH	0.25	10PTP	96	37	29	838	1000	0.70634
Evergreen	S40T70T30	QP_1	40	70	30	QP	1	BTOPA	117	203	8	672	1000	0.421918
Evergreen	S40T70T30	QP_1	40	70	30	QP	1	EETOD	109	128	16	747	1000	0.52436
Evergreen	S40T70T30	QP_1	40	70	30	QP	1	ETeSS	102	69	23	806	1000	0.636723
Evergreen	S40T70T30	QP_1	40	70	30	QP	1	ETrSS	101	49	24	826	1000	0.692632
Evergreen	S40T70T30	QP_1	40	70	30	QP	1	FC1	119	279	6	596	1000	0.327037
Evergreen	S40T70T30	QP_1	40	70	30	QP	1	FC5	113	165	12	710	1000	0.469265
Evergreen	S40T70T30	QP_1	40	70	30	QP	1	FC10	108	124	17	751	1000	0.528428
Evergreen	S40T70T30	QP_1	40	70	30	QP	1	MTeSPS	101	41	24	834	1000	0.719222
Evergreen	S40T70T30	QP_1	40	70	30	QP	1	MTP	113	164	12	711	1000	0.471074
Evergreen	S40T70T30	QP_1	40	70	30	QP	1	MTrSPS	102	54	23	821	1000	0.681818
Evergreen	S40T70T30	QP_1	40	70	30	QP	1	10PTP	102	63	23	812	1000	0.654271
Evergreen	S40T70T30	QP_3	40	70	30	QP	3	BTOPA	118	303	7	572	1000	0.296653
Evergreen	S40T70T30	QP_3	40	70	30	QP	3	EETOD	118	250	7	625	1000	0.359102
Evergreen	S40T70T30	QP_3	40	70	30	QP	3	ETeSS	102	85	23	790	1000	0.592837
Evergreen	S40T70T30	QP_3	40	70	30	QP	3	ETrSS	102	77	23	798	1000	0.614272
Evergreen	S40T70T30	QP_3	40	70	30	QP	3	FC1	122	404	3	471	1000	0.216554
Evergreen	S40T70T30	QP_3	40	70	30	QP	3	FC5	118	281	7	594	1000	0.321155
Evergreen	S40T70T30	QP_3	40	70	30	QP	3	FC10	114	211	11	664	1000	0.397966
Evergreen	S40T70T30	QP_3	40	70	30	QP	3	MTeSPS	102	86	23	789	1000	0.590226
Evergreen	S40T70T30	QP_3	40	70	30	QP	3	MTP	113	197	12	678	1000	0.415385
Evergreen	S40T70T30	QP_3	40	70	30	QP	3	MTrSPS	102	91	23	784	1000	0.577386
Evergreen	S40T70T30	QP_3	40	70	30	QP	3	10PTP	105	108	20	767	1000	0.550483
Evergreen	S40T70T30	QP_5	40	70	30	QP	5	BTOPA	121	354	4	521	1000	0.256104
Evergreen	S40T70T30	QP_5	40	70	30	QP	5	EETOD	119	328	6	547	1000	0.274307
Evergreen	S40T70T30	QP_5	40	70	30	QP	5	ETeSS	102	109	23	766	1000	0.533981
Evergreen	S40T70T30	QP_5	40	70	30	QP	5	ETrSS	101	90	24	785	1000	0.575023
Evergreen	S40T70T30	QP_5	40	70	30	QP	5	FC1	122	522	3	353	1000	0.136513
Evergreen	S40T70T30	QP_5	40	70	30	QP	5	FC5	121	344	4	531	1000	0.265435
Evergreen	S40T70T30	QP_5	40	70	30	QP	5	FC10	118	277	7	598	1000	0.325816
Evergreen	S40T70T30	QP_5	40	70	30	QP	5	MTeSPS	102	120	23	755	1000	0.509434
Evergreen	S40T70T30	QP_5	40	70	30	QP	5	MTP	112	201	13	674	1000	0.405142
Evergreen	S40T70T30	QP_5	40	70	30	QP	5	MTrSPS	102	122	23	753	1000	0.505119
Evergreen	S40T70T30	QP_5	40	70	30	QP	5	10PTP	106	141	19	734	1000	0.484287
Evergreen	S40T70T30	QP_025	40	70	30	QP	0.25	BTOPA	116	161	9	714	1000	0.489106
Evergreen	S40T70T30	QP_025	40	70	30	QP	0.25	EETOD	108	88	17	787	1000	0.613971
Evergreen	S40T70T30	QP_025	40	70	30	QP	0.25	ETeSS	101	48	24	827	1000	0.695882
Evergreen	S40T70T30	QP_025	40	70	30	QP	0.25	ETrSS	101	52	24	823	1000	0.683003
Evergreen	S40T70T30	QP_025	40	70	30	QP	0.25	FC1	118	204	7	671	1000	0.424284
Evergreen	S40T70T30	QP_025	40	70	30	QP	0.25	FC5	111	115	14	760	1000	0.561969
Evergreen	S40T70T30	QP_025	40	70	30	QP	0.25	FC10	106	84	19	791	1000	0.614953
Evergreen	S40T70T30	QP_025	40	70	30	QP	0.25	MTeSPS	101	47	24	828	1000	0.699153
Evergreen	S40T70T30	QP_025	40	70	30	QP	0.25	MTP	116	144	9	731	1000	0.521875
Evergreen	S40T70T30	QP_025	40	70	30	QP	0.25	MTrSPS	105	65	20	810	1000	0.663366
Evergreen	S40T70T30	QP_025	40	70	30	QP	0.25	10PTP	103	55	22	820	1000	0.683778
Evergreen	S40T70T30	T_1	40	70	30	T	1	BTOPA	113	374	12	501	1000	0.212647
Evergreen	S40T70T30	T_1	40	70	30	T	1	EETOD	112	256	13	619	1000	0.329177
Evergreen	S40T70T30	T_1	40	70	30	T	1	ETeSS	107	141	18	734	1000	0.488746
Evergreen	S40T70T30	T_1	40	70	30	T	1	ETrSS	103	122	22	753	1000	0.509787
Evergreen	S40T70T30	T_1	40	70	30	T	1	FC1	124	749	1	126	1000	0.0381533
Evergreen	S40T70T30	T_1	40	70	30	T	1	FC5	119	526	6	349	1000	0.126078
Evergreen	S40T70T30	T_1	40	70	30	T	1	FC10	112	322	13	553	1000	0.256382
Evergreen	S40T70T30	T_1	40	70	30	T	1	MTeSPS	107	133	18	742	1000	0.504918
Evergreen	S40T70T30	T_1	40	70	30	T	1	MTP	110	168	15	707	1000	0.451274
Evergreen	S40T70T30	T_1	40	70	30	T	1	MTrSPS	104	129	21	746	1000	0.499583
Evergreen	S40T70T30	T_1	40	70	30	T	1	10PTP	102	119	23	756	1000	0.511608
Evergreen	S40T70T30	T_3	40	70	30	T	3	BTOPA	119	472	6	403	1000	0.158821
Evergreen	S40T70T30	T_3	40	70	30	T	3	EETOD	119	491	6	384	1000	0.146781
Evergreen	S40T70T30	T_3	40	70	30	T	3	ETeSS	106	162	19	713	1000	0.444785
Evergreen	S40T70T30	T_3	40	70	30	T	3	ETrSS	96	115	29	760	1000	0.491615
Evergreen	S40T70T30	T_3	40	70	30	T	3	FC1	124	852	1	23	1000	0.00466744
Evergreen	S40T70T30	T_3	40	70	30	T	3	FC5	124	740	1	135	1000	0.0413972
Evergreen	S40T70T30	T_3	40	70	30	T	3	FC10	121	593	4	282	1000	0.0961393
Evergreen	S40T70T30	T_3	40	70	30	T	3	MTeSPS	97	118	28	757	1000	0.489956
Evergreen	S40T70T30	T_3	40	70	30	T	3	MTP	114	322	11	553	1000	0.263274
Evergreen	S40T70T30	T_3	40	70	30	T	3	MTrSPS	96	115	29	760	1000	0.491615
Evergreen	S40T70T30	T_3	40	70	30	T	3	10PTP	100	142	25	733	1000	0.455139
Evergreen	S40T70T30	T_5	40	70	30	T	5	BTOPA	124	755	1	120	1000	0.0360217
Evergreen	S40T70T30	T_5	40	70	30	T	5	EETOD	115	399	10	476	1000	0.198825
Evergreen	S40T70T30	T_5	40	70	30	T	5	ETeSS	110	208	15	667	1000	0.38652
Evergreen	S40T70T30	T_5	40	70	30	T	5	ETrSS	103	153	22	722	1000	0.44795
Evergreen	S40T70T30	T_5	40	70	30	T	5	FC1	125	859	0	16	1000	0.00463499
Evergreen	S40T70T30	T_5	40	70	30	T	5	FC5	124	800	1	75	1000	0.0207824
Evergreen	S40T70T30	T_5	40	70	30	T	5	FC10	122	665	3	210	1000	0.0660608
Evergreen	S40T70T30	T_5	40	70	30	T	5	MTeSPS	105	173	20	702	1000	0.421289
Evergreen	S40T70T30	T_5	40	70	30	T	5	MTP	113	294	12	581	1000	0.288786
Evergreen	S40T70T30	T_5	40	70	30	T	5	MTrSPS	105	174	20	701	1000	0.419596
Evergreen	S40T70T30	T_5	40	70	30	T	5	10PTP	106	177	19	698	1000	0.418829
Evergreen	S40T70T30	T_025	40	70	30	T	0.25	BTOPA	107	182	18	693	1000	0.414777
Evergreen	S40T70T30	T_025	40	70	30	T	0.25	EETOD	90	62	35	813	1000	0.594142
Evergreen	S40T70T30	T_025	40	70	30	T	0.25	ETeSS	108	221	17	654	1000	0.359785
Evergreen	S40T70T30	T_025	40	70	30	T	0.25	ETrSS	74	30	51	845	1000	0.600985
Evergreen	S40T70T30	T_025	40	70	30	T	0.25	FC1	116	462	9	413	1000	0.15667
Evergreen	S40T70T30	T_025	40	70	30	T	0.25	FC5	107	169	18	706	1000	0.436747
Evergreen	S40T70T30	T_025	40	70	30	T	0.25	FC10	100	98	25	777	1000	0.550274
Evergreen	S40T70T30	T_025	40	70	30	T	0.25	MTeSPS	108	241	17	634	1000	0.332902
Evergreen	S40T70T30	T_025	40	70	30	T	0.25	MTP	74	36	51	839	1000	0.580723
Evergreen	S40T70T30	T_025	40	70	30	T	0.25	MTrSPS	74	36	51	839	1000	0.580723
Evergreen	S40T70T30	T_025	40	70	30	T	0.25	10PTP	47	11	78	864	1000	0.47181
Evergreen	S40T70T30	TQ_1	40	70	30	TQ	1	BTOPA	115	285	10	590	1000	0.305882
Evergreen	S40T70T30	TQ_1	40	70	30	TQ	1	EETOD	110	162	15	713	1000	0.462006
Evergreen	S40T70T30	TQ_1	40	70	30	TQ	1	ETeSS	111	203	14	672	1000	0.398058
Evergreen	S40T70T30	TQ_1	40	70	30	TQ	1	ETrSS	103	84	22	791	1000	0.600377
Evergreen	S40T70T30	TQ_1	40	70	30	TQ	1	FC1	123	607	2	268	1000	0.0944238
Evergreen	S40T70T30	TQ_1	40	70	30	TQ	1	FC5	115	320	10	555	1000	0.268698
Evergreen	S40T70T30	TQ_1	40	70	30	TQ	1	FC10	111	190	14	685	1000	0.418389
Evergreen	S40T70T30	TQ_1	40	70	30	TQ	1	MTeSPS	110	157	15	718	1000	0.471176
Evergreen	S40T70T30	TQ_1	40	70	30	TQ	1	MTP	111	222	14	653	1000	0.370247
Evergreen	S40T70T30	TQ_1	40	70	30	TQ	1	MTrSPS	103	72	22	803	1000	0.633171
Evergreen	S40T70T30	TQ_1	40	70	30	TQ	1	10PTP	103	68	22	807	1000	0.64462
Evergreen	S40T70T30	TQ_3	40	70	30	TQ	3	BTOPA	122	443	3	432	1000	0.187244
Evergreen	S40T70T30	TQ_3	40	70	30	TQ	3	EETOD	119	333	6	542	1000	0.269397
Evergreen	S40T70T30	TQ_3	40	70	30	TQ	3	ETeSS	106	110	19	765	1000	0.550523
Evergreen	S40T70T30	TQ_3	40	70	30	TQ	3	ETrSS	107	118	18	757	1000	0.537021
Evergreen	S40T70T30	TQ_3	40	70	30	TQ	3	FC1	123	629	2	246	1000	0.08418
Evergreen	S40T70T30	TQ_3	40	70	30	TQ	3	FC5	122	452	3	423	1000	0.180918
Evergreen	S40T70T30	TQ_3	40	70	30	TQ	3	FC10	119	343	6	532	1000	0.259809
Evergreen	S40T70T30	TQ_3	40	70	30	TQ	3	MTeSPS	107	122	18	753	1000	0.528222
Evergreen	S40T70T30	TQ_3	40	70	30	TQ	3	MTP	119	372	6	503	1000	0.233654
Evergreen	S40T70T30	TQ_3	40	70	30	TQ	3	MTrSPS	110	152	15	723	1000	0.48056
Evergreen	S40T70T30	TQ_3	40	70	30	TQ	3	10PTP	107	136	18	739	1000	0.498779
Evergreen	S40T70T30	TQ_5	40	70	30	TQ	5	BTOPA	122	492	3	383	1000	0.154569
Evergreen	S40T70T30	TQ_5	40	70	30	TQ	5	EETOD	122	420	3	455	1000	0.204139
Evergreen	S40T70T30	TQ_5	40	70	30	TQ	5	ETeSS	108	176	17	699	1000	0.428994
Evergreen	S40T70T30	TQ_5	40	70	30	TQ	5	ETrSS	108	169	17	706	1000	0.441022
Evergreen	S40T70T30	TQ_5	40	70	30	TQ	5	FC1	123	673	2	202	1000	0.065097
Evergreen	S40T70T30	TQ_5	40	70	30	TQ	5	FC5	122	516	3	359	1000	0.140017
Evergreen	S40T70T30	TQ_5	40	70	30	TQ	5	FC10	122	416	3	459	1000	0.20719
Evergreen	S40T70T30	TQ_5	40	70	30	TQ	5	MTeSPS	110	189	15	686	1000	0.415891
Evergreen	S40T70T30	TQ_5	40	70	30	TQ	5	MTP	122	395	3	480	1000	0.223793
Evergreen	S40T70T30	TQ_5	40	70	30	TQ	5	MTrSPS	113	243	12	632	1000	0.34949
Evergreen	S40T70T30	TQ_5	40	70	30	TQ	5	10PTP	112	221	13	654	1000	0.375584
Evergreen	S40T70T30	TQ_025	40	70	30	TQ	0.25	BTOPA	108	227	17	648	1000	0.351495
Evergreen	S40T70T30	TQ_025	40	70	30	TQ	0.25	EETOD	100	76	25	799	1000	0.607004
Evergreen	S40T70T30	TQ_025	40	70	30	TQ	0.25	ETeSS	107	146	18	729	1000	0.478952
Evergreen	S40T70T30	TQ_025	40	70	30	TQ	0.25	ETrSS	91	57	34	818	1000	0.614407
Evergreen	S40T70T30	TQ_025	40	70	30	TQ	0.25	FC1	118	564	7	311	1000	0.102907
Evergreen	S40T70T30	TQ_025	40	70	30	TQ	0.25	FC5	108	213	17	662	1000	0.371155
Evergreen	S40T70T30	TQ_025	40	70	30	TQ	0.25	FC10	103	114	22	761	1000	0.527368
Evergreen	S40T70T30	TQ_025	40	70	30	TQ	0.25	MTeSPS	108	154	17	721	1000	0.468118
Evergreen	S40T70T30	TQ_025	40	70	30	TQ	0.25	MTP	99	73	26	802	1000	0.610236
Evergreen	S40T70T30	TQ_025	40	70	30	TQ	0.25	MTrSPS	94	64	31	811	1000	0.609856
Evergreen	S40T70T30	TQ_025	40	70	30	TQ	0.25	10PTP	73	28	52	847	1000	0.601494
Evergreen	S40T90T10	Auto	40	90	10	Auto	1	BTOPA	120	288	5	587	1000	0.320186
Evergreen	S40T90T10	Auto	40	90	10	Auto	1	EETOD	107	108	18	767	1000	0.559825
Evergreen	S40T90T10	Auto	40	90	10	Auto	1	ETeSS	96	34	29	841	1000	0.716854
Evergreen	S40T90T10	Auto	40	90	10	Auto	1	ETrSS	101	68	24	807	1000	0.634558
Evergreen	S40T90T10	Auto	40	90	10	Auto	1	FC1	121	305	4	570	1000	0.304837
Evergreen	S40T90T10	Auto	40	90	10	Auto	1	FC5	113	168	12	707	1000	0.463887
Evergreen	S40T90T10	Auto	40	90	10	Auto	1	FC10	108	112	17	763	1000	0.555172
Evergreen	S40T90T10	Auto	40	90	10	Auto	1	MTeSPS	96	34	29	841	1000	0.716854
Evergreen	S40T90T10	Auto	40	90	10	Auto	1	MTP	120	288	5	587	1000	0.320186
Evergreen	S40T90T10	Auto	40	90	10	Auto	1	MTrSPS	101	68	24	807	1000	0.634558
Evergreen	S40T90T10	Auto	40	90	10	Auto	1	10PTP	101	68	24	807	1000	0.634558
Evergreen	S40T90T10	H_1	40	90	10	H	1	BTOPA	116	225	9	650	1000	0.385424
Evergreen	S40T90T10	H_1	40	90	10	H	1	EETOD	109	149	16	726	1000	0.481947
Evergreen	S40T90T10	H_1	40	90	10	H	1	ETeSS	97	56	28	819	1000	0.649635
Evergreen	S40T90T10	H_1	40	90	10	H	1	ETrSS	101	93	24	782	1000	0.567468
Evergreen	S40T90T10	H_1	40	90	10	H	1	FC1	122	421	3	454	1000	0.203382
Evergreen	S40T90T10	H_1	40	90	10	H	1	FC5	116	210	9	665	1000	0.407307
Evergreen	S40T90T10	H_1	40	90	10	H	1	FC10	109	154	16	721	1000	0.472459
Evergreen	S40T90T10	H_1	40	90	10	H	1	MTeSPS	97	56	28	819	1000	0.649635
Evergreen	S40T90T10	H_1	40	90	10	H	1	MTP	110	176	15	699	1000	0.437408
Evergreen	S40T90T10	H_1	40	90	10	H	1	MTrSPS	100	91	25	784	1000	0.567568
Evergreen	S40T90T10	H_1	40	90	10	H	1	10PTP	100	91	25	784	1000	0.567568
Evergreen	S40T90T10	H_3	40	90	10	H	3	BTOPA	121	339	4	536	1000	0.270213
Evergreen	S40T90T10	H_3	40	90	10	H	3	EETOD	120	308	5	567	1000	0.298206
Evergreen	S40T90T10	H_3	40	90	10	H	3	ETeSS	100	97	25	778	1000	0.552704
Evergreen	S40T90T10	H_3	40	90	10	H	3	ETrSS	100	120	25	755	1000	0.5
Evergreen	S40T90T10	H_3	40	90	10	H	3	FC1	125	766	0	109	1000	0.0343523
Evergreen	S40T90T10	H_3	40	90	10	H	3	FC5	123	457	2	418	1000	0.180357
Evergreen	S40T90T10	H_3	40	90	10	H	3	FC10	120	304	5	571	1000	0.302483
Evergreen	S40T90T10	H_3	40	90	10	H	3	MTeSPS	100	97	25	778	1000	0.552704
Evergreen	S40T90T10	H_3	40	90	10	H	3	MTP	114	205	11	670	1000	0.407001
Evergreen	S40T90T10	H_3	40	90	10	H	3	MTrSPS	101	132	24	743	1000	0.479566
Evergreen	S40T90T10	H_3	40	90	10	H	3	10PTP	101	133	24	742	1000	0.477537
Evergreen	S40T90T10	H_5	40	90	10	H	5	BTOPA	122	376	3	499	1000	0.239719
Evergreen	S40T90T10	H_5	40	90	10	H	5	EETOD	122	395	3	480	1000	0.223793
Evergreen	S40T90T10	H_5	40	90	10	H	5	ETeSS	105	136	20	739	1000	0.489779
Evergreen	S40T90T10	H_5	40	90	10	H	5	ETrSS	101	123	24	752	1000	0.498294
Evergreen	S40T90T10	H_5	40	90	10	H	5	FC1	125	776	0	99	1000	0.0309085
Evergreen	S40T90T10	H_5	40	90	10	H	5	FC5	124	527	1	348	1000	0.139013
Evergreen	S40T90T10	H_5	40	90	10	H	5	FC10	122	384	3	491	1000	0.232904
Evergreen	S40T90T10	H_5	40	90	10	H	5	MTeSPS	105	136	20	739	1000	0.489779
Evergreen	S40T90T10	H_5	40	90	10	H	5	MTP	117	249	8	626	1000	0.356696
Evergreen	S40T90T10	H_5	40	90	10	H	5	MTrSPS	107	164	18	711	1000	0.445545
Evergreen	S40T90T10	H_5	40	90	10	H	5	10PTP	105	147	20	728	1000	0.468153
Evergreen	S40T90T10	H_025	40	90	10	H	0.25	BTOPA	112	159	13	716	1000	0.476009
Evergreen	S40T90T10	H_025	40	90	10	H	0.25	EETOD	102	71	23	804	1000	0.631011
Evergreen	S40T90T10	H_025	40	90	10	H	0.25	ETeSS	99	49	26	826	1000	0.682203
Evergreen	S40T90T10	H_025	40	90	10	H	0.25	ETrSS	99	49	26	826	1000	0.682203
Evergreen	S40T90T10	H_025	40	90	10	H	0.25	FC1	112	204	13	671	1000	0.400552
Evergreen	S40T90T10	H_025	40	90	10	H	0.25	FC5	108	120	17	755	1000	0.537162
Evergreen	S40T90T10	H_025	40	90	10	H	0.25	FC10	102	70	23	805	1000	0.633858
Evergreen	S40T90T10	H_025	40	90	10	H	0.25	MTeSPS	97	39	28	836	1000	0.704846
Evergreen	S40T90T10	H_025	40	90	10	H	0.25	MTP	104	114	21	761	1000	0.532062
Evergreen	S40T90T10	H_025	40	90	10	H	0.25	MTrSPS	104	73	21	802	1000	0.635306
Evergreen	S40T90T10	H_025	40	90	10	H	0.25	10PTP	95	38	30	837	1000	0.697442
Evergreen	S40T90T10	L_1	40	90	10	L	1	BTOPA	118	257	7	618	1000	0.350154
Evergreen	S40T90T10	L_1	40	90	10	L	1	EETOD	114	209	11	666	1000	0.400953
Evergreen	S40T90T10	L_1	40	90	10	L	1	ETeSS	102	126	23	749	1000	0.496622
Evergreen	S40T90T10	L_1	40	90	10	L	1	ETrSS	102	104	23	771	1000	0.545617
Evergreen	S40T90T10	L_1	40	90	10	L	1	FC1	124	591	1	284	1000	0.104726
Evergreen	S40T90T10	L_1	40	90	10	L	1	FC5	120	328	5	547	1000	0.277657
Evergreen	S40T90T10	L_1	40	90	10	L	1	FC10	116	221	9	654	1000	0.391132
Evergreen	S40T90T10	L_1	40	90	10	L	1	MTeSPS	98	86	27	789	1000	0.570342
Evergreen	S40T90T10	L_1	40	90	10	L	1	MTP	117	238	8	637	1000	0.371246
Evergreen	S40T90T10	L_1	40	90	10	L	1	MTrSPS	102	129	23	746	1000	0.49036
Evergreen	S40T90T10	L_1	40	90	10	L	1	10PTP	107	148	18	727	1000	0.475099
Evergreen	S40T90T10	L_3	40	90	10	L	3	BTOPA	119	295	6	580	1000	0.30884
Evergreen	S40T90T10	L_3	40	90	10	L	3	EETOD	118	250	7	625	1000	0.359102
Evergreen	S40T90T10	L_3	40	90	10	L	3	ETeSS	103	139	22	736	1000	0.474715
Evergreen	S40T90T10	L_3	40	90	10	L	3	ETrSS	103	129	22	746	1000	0.494983
Evergreen	S40T90T10	L_3	40	90	10	L	3	FC1	124	627	1	248	1000	0.0875409
Evergreen	S40T90T10	L_3	40	90	10	L	3	FC5	121	360	4	515	1000	0.250643
Evergreen	S40T90T10	L_3	40	90	10	L	3	FC10	118	251	7	624	1000	0.35781
Evergreen	S40T90T10	L_3	40	90	10	L	3	MTeSPS	98	101	27	774	1000	0.533273
Evergreen	S40T90T10	L_3	40	90	10	L	3	MTP	117	222	8	653	1000	0.39354
Evergreen	S40T90T10	L_3	40	90	10	L	3	MTrSPS	112	173	13	702	1000	0.450923
Evergreen	S40T90T10	L_3	40	90	10	L	3	10PTP	111	169	14	706	1000	0.453731
Evergreen	S40T90T10	L_5	40	90	10	L	5	BTOPA	120	329	5	546	1000	0.276665
Evergreen	S40T90T10	L_5	40	90	10	L	5	EETOD	119	302	6	573	1000	0.301191
Evergreen	S40T90T10	L_5	40	90	10	L	5	ETeSS	105	148	20	727	1000	0.466243
Evergreen	S40T90T10	L_5	40	90	10	L	5	ETrSS	103	137	22	738	1000	0.478689
Evergreen	S40T90T10	L_5	40	90	10	L	5	FC1	125	672	0	203	1000	0.0702179
Evergreen	S40T90T10	L_5	40	90	10	L	5	FC5	122	414	3	461	1000	0.208729
Evergreen	S40T90T10	L_5	40	90	10	L	5	FC10	119	300	6	575	1000	0.303358
Evergreen	S40T90T10	L_5	40	90	10	L	5	MTeSPS	105	148	20	727	1000	0.466243
Evergreen	S40T90T10	L_5	40	90	10	L	5	MTP	118	248	7	627	1000	0.361702
Evergreen	S40T90T10	L_5	40	90	10	L	5	MTrSPS	112	179	13	696	1000	0.440641
Evergreen	S40T90T10	L_5	40	90	10	L	5	10PTP	112	174	13	701	1000	0.44919
Evergreen	S40T90T10	L_025	40	90	10	L	0.25	BTOPA	118	250	7	625	1000	0.359102
Evergreen	S40T90T10	L_025	40	90	10	L	0.25	EETOD	113	198	12	677	1000	0.413817
Evergreen	S40T90T10	L_025	40	90	10	L	0.25	ETeSS	102	131	23	744	1000	0.486239
Evergreen	S40T90T10	L_025	40	90	10	L	0.25	ETrSS	102	112	23	763	1000	0.527145
Evergreen	S40T90T10	L_025	40	90	10	L	0.25	FC1	124	578	1	297	1000	0.111282
Evergreen	S40T90T10	L_025	40	90	10	L	0.25	FC5	120	311	5	564	1000	0.295036
Evergreen	S40T90T10	L_025	40	90	10	L	0.25	FC10	115	212	10	663	1000	0.400405
Evergreen	S40T90T10	L_025	40	90	10	L	0.25	MTeSPS	106	143	19	732	1000	0.480353
Evergreen	S40T90T10	L_025	40	90	10	L	0.25	MTP	115	209	10	666	1000	0.404891
Evergreen	S40T90T10	L_025	40	90	10	L	0.25	MTrSPS	102	131	23	744	1000	0.486239
Evergreen	S40T90T10	L_025	40	90	10	L	0.25	10PTP	105	140	20	735	1000	0.481781
Evergreen	S40T90T10	LQ_1	40	90	10	LQ	1	BTOPA	122	351	3	524	1000	0.262116
Evergreen	S40T90T10	LQ_1	40	90	10	LQ	1	EETOD	115	133	10	742	1000	0.540193
Evergreen	S40T90T10	LQ_1	40	90	10	LQ	1	ETeSS	105	71	20	804	1000	0.645914
Evergreen	S40T90T10	LQ_1	40	90	10	LQ	1	ETrSS	105	66	20	809	1000	0.660415
Evergreen	S40T90T10	LQ_1	40	90	10	LQ	1	FC1	122	406	3	469	1000	0.214971
Evergreen	S40T90T10	LQ_1	40	90	10	LQ	1	FC5	119	217	6	658	1000	0.408488
Evergreen	S40T90T10	LQ_1	40	90	10	LQ	1	FC10	115	137	10	738	1000	0.531847
Evergreen	S40T90T10	LQ_1	40	90	10	LQ	1	MTeSPS	105	71	20	804	1000	0.645914
Evergreen	S40T90T10	LQ_1	40	90	10	LQ	1	MTP	122	431	3	444	1000	0.195924
Evergreen	S40T90T10	LQ_1	40	90	10	LQ	1	MTrSPS	106	91	19	784	1000	0.5967
Evergreen	S40T90T10	LQ_1	40	90	10	LQ	1	10PTP	106	88	19	787	1000	0.604436
Evergreen	S40T90T10	LQ_3	40	90	10	LQ	3	BTOPA	121	320	4	555	1000	0.289084
Evergreen	S40T90T10	LQ_3	40	90	10	LQ	3	EETOD	118	206	7	669	1000	0.421196
Evergreen	S40T90T10	LQ_3	40	90	10	LQ	3	ETeSS	105	83	20	792	1000	0.612782
Evergreen	S40T90T10	LQ_3	40	90	10	LQ	3	ETrSS	106	84	19	791	1000	0.614953
Evergreen	S40T90T10	LQ_3	40	90	10	LQ	3	FC1	123	575	2	300	1000	0.110254
Evergreen	S40T90T10	LQ_3	40	90	10	LQ	3	FC5	122	342	3	533	1000	0.270613
Evergreen	S40T90T10	LQ_3	40	90	10	LQ	3	FC10	119	216	6	659	1000	0.409967
Evergreen	S40T90T10	LQ_3	40	90	10	LQ	3	MTeSPS	105	83	20	792	1000	0.612782
Evergreen	S40T90T10	LQ_3	40	90	10	LQ	3	MTP	123	593	2	282	1000	0.101208
Evergreen	S40T90T10	LQ_3	40	90	10	LQ	3	MTrSPS	110	137	15	738	1000	0.510073
Evergreen	S40T90T10	LQ_3	40	90	10	LQ	3	10PTP	107	115	18	760	1000	0.543739
Evergreen	S40T90T10	LQ_5	40	90	10	LQ	5	BTOPA	122	476	3	399	1000	0.164778
Evergreen	S40T90T10	LQ_5	40	90	10	LQ	5	EETOD	120	272	5	603	1000	0.338902
Evergreen	S40T90T10	LQ_5	40	90	10	LQ	5	ETeSS	106	90	19	785	1000	0.599265
Evergreen	S40T90T10	LQ_5	40	90	10	LQ	5	ETrSS	106	99	19	776	1000	0.576682
Evergreen	S40T90T10	LQ_5	40	90	10	LQ	5	FC1	123	632	2	243	1000	0.082821
Evergreen	S40T90T10	LQ_5	40	90	10	LQ	5	FC5	122	413	3	462	1000	0.209501
Evergreen	S40T90T10	LQ_5	40	90	10	LQ	5	FC10	121	288	4	587	1000	0.323683
Evergreen	S40T90T10	LQ_5	40	90	10	LQ	5	MTeSPS	104	84	21	791	1000	0.605263
Evergreen	S40T90T10	LQ_5	40	90	10	LQ	5	MTP	122	468	3	407	1000	0.170044
Evergreen	S40T90T10	LQ_5	40	90	10	LQ	5	MTrSPS	110	125	15	750	1000	0.53527
Evergreen	S40T90T10	LQ_5	40	90	10	LQ	5	10PTP	106	117	19	758	1000	0.534645
Evergreen	S40T90T10	LQ_025	40	90	10	LQ	0.25	BTOPA	121	263	4	612	1000	0.353511
Evergreen	S40T90T10	LQ_025	40	90	10	LQ	0.25	EETOD	112	111	13	764	1000	0.575706
Evergreen	S40T90T10	LQ_025	40	90	10	LQ	0.25	ETeSS	103	33	22	842	1000	0.757709
Evergreen	S40T90T10	LQ_025	40	90	10	LQ	0.25	ETrSS	105	69	20	806	1000	0.651663
Evergreen	S40T90T10	LQ_025	40	90	10	LQ	0.25	FC1	121	280	4	595	1000	0.332942
Evergreen	S40T90T10	LQ_025	40	90	10	LQ	0.25	FC5	117	153	8	722	1000	0.508397
Evergreen	S40T90T10	LQ_025	40	90	10	LQ	0.25	FC10	111	109	14	766	1000	0.575862
Evergreen	S40T90T10	LQ_025	40	90	10	LQ	0.25	MTeSPS	95	27	30	848	1000	0.736721
Evergreen	S40T90T10	LQ_025	40	90	10	LQ	0.25	MTP	121	232	4	643	1000	0.394484
Evergreen	S40T90T10	LQ_025	40	90	10	LQ	0.25	MTrSPS	110	107	15	768	1000	0.576021
Evergreen	S40T90T10	LQ_025	40	90	10	LQ	0.25	10PTP	106	80	19	795	1000	0.625709
Evergreen	S40T90T10	LQP_1	40	90	10	LQP	1	BTOPA	116	186	9	689	1000	0.445235
Evergreen	S40T90T10	LQP_1	40	90	10	LQP	1	EETOD	107	106	18	769	1000	0.56453
Evergreen	S40T90T10	LQP_1	40	90	10	LQP	1	ETeSS	102	56	23	819	1000	0.675565
Evergreen	S40T90T10	LQP_1	40	90	10	LQP	1	ETrSS	100	42	25	833	1000	0.710583
Evergreen	S40T90T10	LQP_1	40	90	10	LQP	1	FC1	118	243	7	632	1000	0.368288
Evergreen	S40T90T10	LQP_1	40	90	10	LQP	1	FC5	112	141	13	734	1000	0.510723
Evergreen	S40T90T10	LQP_1	40	90	10	LQP	1	FC10	107	100	18	775	1000	0.578947
Evergreen	S40T90T10	LQP_1	40	90	10	LQP	1	MTeSPS	102	55	23	820	1000	0.678682
Evergreen	S40T90T10	LQP_1	40	90	10	LQP	1	MTP	115	158	10	717	1000	0.490523
Evergreen	S40T90T10	LQP_1	40	90	10	LQP	1	MTrSPS	102	48	23	827	1000	0.701053
Evergreen	S40T90T10	LQP_1	40	90	10	LQP	1	10PTP	100	39	25	836	1000	0.720829
Evergreen	S40T90T10	LQP_3	40	90	10	LQP	3	BTOPA	118	265	7	610	1000	0.340206
Evergreen	S40T90T10	LQP_3	40	90	10	LQP	3	EETOD	114	198	11	677	1000	0.417827
Evergreen	S40T90T10	LQP_3	40	90	10	LQP	3	ETeSS	101	69	24	806	1000	0.631683
Evergreen	S40T90T10	LQP_3	40	90	10	LQP	3	ETrSS	101	78	24	797	1000	0.606557
Evergreen	S40T90T10	LQP_3	40	90	10	LQP	3	FC1	122	357	3	518	1000	0.256582
Evergreen	S40T90T10	LQP_3	40	90	10	LQP	3	FC5	118	236	7	639	1000	0.377721
Evergreen	S40T90T10	LQP_3	40	90	10	LQP	3	FC10	112	179	13	696	1000	0.440641
Evergreen	S40T90T10	LQP_3	40	90	10	LQP	3	MTeSPS	101	69	24	806	1000	0.631683
Evergreen	S40T90T10	LQP_3	40	90	10	LQP	3	MTP	118	239	7	636	1000	0.373647
Evergreen	S40T90T10	LQP_3	40	90	10	LQP	3	MTrSPS	102	95	23	780	1000	0.567369
Evergreen	S40T90T10	LQP_3	40	90	10	LQP	3	10PTP	102	88	23	787	1000	0.585047
Evergreen	S40T90T10	LQP_5	40	90	10	LQP	5	BTOPA	121	336	4	539	1000	0.273116
Evergreen	S40T90T10	LQP_5	40	90	10	LQP	5	EETOD	118	290	7	585	1000	0.310905
Evergreen	S40T90T10	LQP_5	40	90	10	LQP	5	ETeSS	104	109	21	766	1000	0.543459
Evergreen	S40T90T10	LQP_5	40	90	10	LQP	5	ETrSS	102	86	23	789	1000	0.590226
Evergreen	S40T90T10	LQP_5	40	90	10	LQP	5	FC1	122	470	3	405	1000	0.168717
Evergreen	S40T90T10	LQP_5	40	90	10	LQP	5	FC5	121	321	4	554	1000	0.288061
Evergreen	S40T90T10	LQP_5	40	90	10	LQP	5	FC10	118	247	7	628	1000	0.363009
Evergreen	S40T90T10	LQP_5	40	90	10	LQP	5	MTeSPS	95	42	30	833	1000	0.683864
Evergreen	S40T90T10	LQP_5	40	90	10	LQP	5	MTP	116	235	9	640	1000	0.371539
Evergreen	S40T90T10	LQP_5	40	90	10	LQP	5	MTrSPS	103	99	22	776	1000	0.562387
Evergreen	S40T90T10	LQP_5	40	90	10	LQP	5	10PTP	103	94	22	781	1000	0.574702
Evergreen	S40T90T10	LQP_025	40	90	10	LQP	0.25	BTOPA	118	199	7	676	1000	0.432116
Evergreen	S40T90T10	LQP_025	40	90	10	LQP	0.25	EETOD	108	89	17	786	1000	0.611366
Evergreen	S40T90T10	LQP_025	40	90	10	LQP	0.25	ETeSS	104	66	21	809	1000	0.655446
Evergreen	S40T90T10	LQP_025	40	90	10	LQP	0.25	ETrSS	104	59	21	816	1000	0.676441
Evergreen	S40T90T10	LQP_025	40	90	10	LQP	0.25	FC1	118	214	7	661	1000	0.409091
Evergreen	S40T90T10	LQP_025	40	90	10	LQP	0.25	FC5	114	123	11	752	1000	0.557391
Evergreen	S40T90T10	LQP_025	40	90	10	LQP	0.25	FC10	108	88	17	787	1000	0.613971
Evergreen	S40T90T10	LQP_025	40	90	10	LQP	0.25	MTeSPS	100	39	25	836	1000	0.720829
Evergreen	S40T90T10	LQP_025	40	90	10	LQP	0.25	MTP	118	178	7	697	1000	0.466859
Evergreen	S40T90T10	LQP_025	40	90	10	LQP	0.25	MTrSPS	107	86	18	789	1000	0.614458
Evergreen	S40T90T10	LQP_025	40	90	10	LQP	0.25	10PTP	104	61	21	814	1000	0.670352
Evergreen	S40T90T10	LQPT_1	40	90	10	LQPT	1	BTOPA	114	202	11	673	1000	0.411602
Evergreen	S40T90T10	LQPT_1	40	90	10	LQPT	1	EETOD	109	130	16	745	1000	0.520131
Evergreen	S40T90T10	LQPT_1	40	90	10	LQPT	1	ETeSS	87	16	38	859	1000	0.733004
Evergreen	S40T90T10	LQPT_1	40	90	10	LQPT	1	ETrSS	99	69	26	806	1000	0.621514
Evergreen	S40T90T10	LQPT_1	40	90	10	LQPT	1	FC1	121	376	4	499	1000	0.236565
Evergreen	S40T90T10	LQPT_1	40	90	10	LQPT	1	FC5	114	195	11	680	1000	0.422565
Evergreen	S40T90T10	LQPT_1	40	90	10	LQPT	1	FC10	109	137	16	738	1000	0.505654
Evergreen	S40T90T10	LQPT_1	40	90	10	LQPT	1	MTeSPS	87	16	38	859	1000	0.733004
Evergreen	S40T90T10	LQPT_1	40	90	10	LQPT	1	MTP	109	134	16	741	1000	0.511798
Evergreen	S40T90T10	LQPT_1	40	90	10	LQPT	1	MTrSPS	103	90	22	785	1000	0.584801
Evergreen	S40T90T10	LQPT_1	40	90	10	LQPT	1	10PTP	98	56	27	819	1000	0.654886
Evergreen	S40T90T10	LQPT_3	40	90	10	LQPT	3	BTOPA	118	276	7	599	1000	0.326992
Evergreen	S40T90T10	LQPT_3	40	90	10	LQPT	3	EETOD	112	195	13	680	1000	0.414497
Evergreen	S40T90T10	LQPT_3	40	90	10	LQPT	3	ETeSS	100	50	25	825	1000	0.684211
Evergreen	S40T90T10	LQPT_3	40	90	10	LQPT	3	ETrSS	102	71	23	804	1000	0.631011
Evergreen	S40T90T10	LQPT_3	40	90	10	LQPT	3	FC1	121	359	4	516	1000	0.251546
Evergreen	S40T90T10	LQPT_3	40	90	10	LQPT	3	FC5	116	236	9	639	1000	0.37018
Evergreen	S40T90T10	LQPT_3	40	90	10	LQPT	3	FC10	112	181	13	694	1000	0.437273
Evergreen	S40T90T10	LQPT_3	40	90	10	LQPT	3	MTeSPS	100	50	25	825	1000	0.684211
Evergreen	S40T90T10	LQPT_3	40	90	10	LQPT	3	MTP	114	225	11	650	1000	0.377719
Evergreen	S40T90T10	LQPT_3	40	90	10	LQPT	3	MTrSPS	102	71	23	804	1000	0.631011
Evergreen	S40T90T10	LQPT_3	40	90	10	LQPT	3	10PTP	102	70	23	805	1000	0.633858
Evergreen	S40T90T10	LQPT_5	40	90	10	LQPT	5	BTOPA	121	322	4	553	1000	0.287042
Evergreen	S40T90T10	LQPT_5	40	90	10	LQPT	5	EETOD	118	275	7	600	1000	0.328172
Evergreen	S40T90T10	LQPT_5	40	90	10	LQPT	5	ETeSS	102	90	23	785	1000	0.579926
Evergreen	S40T90T10	LQPT_5	40	90	10	LQPT	5	ETrSS	102	91	23	784	1000	0.577386
Evergreen	S40T90T10	LQPT_5	40	90	10	LQPT	5	FC1	122	460	3	415	1000	0.175423
Evergreen	S40T90T10	LQPT_5	40	90	10	LQPT	5	FC5	118	312	7	563	1000	0.287151
Evergreen	S40T90T10	LQPT_5	40	90	10	LQPT	5	FC10	115	237	10	638	1000	0.365039
Evergreen	S40T90T10	LQPT_5	40	90	10	LQPT	5	MTeSPS	102	90	23	785	1000	0.579926
Evergreen	S40T90T10	LQPT_5	40	90	10	LQPT	5	MTP	115	230	10	645	1000	0.374593
Evergreen	S40T90T10	LQPT_5	40	90	10	LQPT	5	MTrSPS	102	95	23	780	1000	0.567369
Evergreen	S40T90T10	LQPT_5	40	90	10	LQPT	5	10PTP	102	94	23	781	1000	0.569853
Evergreen	S40T90T10	LQPT_025	40	90	10	LQPT	0.25	BTOPA	106	186	19	689	1000	0.40407
Evergreen	S40T90T10	LQPT_025	40	90	10	LQPT	0.25	EETOD	94	71	31	804	1000	0.58995
Evergreen	S40T90T10	LQPT_025	40	90	10	LQPT	0.25	ETeSS	97	81	28	794	1000	0.578337
Evergreen	S40T90T10	LQPT_025	40	90	10	LQPT	0.25	ETrSS	79	36	46	839	1000	0.611834
Evergreen	S40T90T10	LQPT_025	40	90	10	LQPT	0.25	FC1	116	470	9	405	1000	0.151461
Evergreen	S40T90T10	LQPT_025	40	90	10	LQPT	0.25	FC5	106	157	19	718	1000	0.45384
Evergreen	S40T90T10	LQPT_025	40	90	10	LQPT	0.25	FC10	98	83	27	792	1000	0.57814
Evergreen	S40T90T10	LQPT_025	40	90	10	LQPT	0.25	MTeSPS	97	81	28	794	1000	0.578337
Evergreen	S40T90T10	LQPT_025	40	90	10	LQPT	0.25	MTP	83	44	42	831	1000	0.609535
Evergreen	S40T90T10	LQPT_025	40	90	10	LQPT	0.25	MTrSPS	83	44	42	831	1000	0.609535
Evergreen	S40T90T10	LQPT_025	40	90	10	LQPT	0.25	10PTP	62	14	63	861	1000	0.576923
Evergreen	S40T90T10	LQPTH_1	40	90	10	LQPTH	1	BTOPA	114	208	11	667	1000	0.402456
Evergreen	S40T90T10	LQPTH_1	40	90	10	LQPTH	1	EETOD	107	120	18	755	1000	0.532599
Evergreen	S40T90T10	LQPTH_1	40	90	10	LQPTH	1	ETeSS	101	65	24	810	1000	0.643287
Evergreen	S40T90T10	LQPTH_1	40	90	10	LQPTH	1	ETrSS	102	81	23	794	1000	0.603432
Evergreen	S40T90T10	LQPTH_1	40	90	10	LQPTH	1	FC1	122	427	3	448	1000	0.198882
Evergreen	S40T90T10	LQPTH_1	40	90	10	LQPTH	1	FC5	114	195	11	680	1000	0.422565
Evergreen	S40T90T10	LQPTH_1	40	90	10	LQPTH	1	FC10	108	124	17	751	1000	0.528428
Evergreen	S40T90T10	LQPTH_1	40	90	10	LQPTH	1	MTeSPS	95	32	30	843	1000	0.718502
Evergreen	S40T90T10	LQPTH_1	40	90	10	LQPTH	1	MTP	109	145	16	730	1000	0.489699
Evergreen	S40T90T10	LQPTH_1	40	90	10	LQPTH	1	MTrSPS	104	103	21	772	1000	0.557538
Evergreen	S40T90T10	LQPTH_1	40	90	10	LQPTH	1	10PTP	101	68	24	807	1000	0.634558
Evergreen	S40T90T10	LQPTH_3	40	90	10	LQPTH	3	BTOPA	117	260	8	615	1000	0.342735
Evergreen	S40T90T10	LQPTH_3	40	90	10	LQPTH	3	EETOD	114	183	11	692	1000	0.442128
Evergreen	S40T90T10	LQPTH_3	40	90	10	LQPTH	3	ETeSS	98	44	27	831	1000	0.693305
Evergreen	S40T90T10	LQPTH_3	40	90	10	LQPTH	3	ETrSS	100	76	25	799	1000	0.607004
Evergreen	S40T90T10	LQPTH_3	40	90	10	LQPTH	3	FC1	121	375	4	500	1000	0.237425
Evergreen	S40T90T10	LQPTH_3	40	90	10	LQPTH	3	FC5	117	244	8	631	1000	0.363234
Evergreen	S40T90T10	LQPTH_3	40	90	10	LQPTH	3	FC10	114	173	11	702	1000	0.459221
Evergreen	S40T90T10	LQPTH_3	40	90	10	LQPTH	3	MTeSPS	98	44	27	831	1000	0.693305
Evergreen	S40T90T10	LQPTH_3	40	90	10	LQPTH	3	MTP	117	251	8	624	1000	0.354115
Evergreen	S40T90T10	LQPTH_3	40	90	10	LQPTH	3	MTrSPS	102	92	23	783	1000	0.574861
Evergreen	S40T90T10	LQPTH_3	40	90	10	LQPTH	3	10PTP	100	76	25	799	1000	0.607004
Evergreen	S40T90T10	LQPTH_5	40	90	10	LQPTH	5	BTOPA	120	327	5	548	1000	0.278653
Evergreen	S40T90T10	LQPTH_5	40	90	10	LQPTH	5	EETOD	116	258	9	617	1000	0.341554
Evergreen	S40T90T10	LQPTH_5	40	90	10	LQPTH	5	ETeSS	101	69	24	806	1000	0.631683
Evergreen	S40T90T10	LQPTH_5	40	90	10	LQPTH	5	ETrSS	101	83	24	792	1000	0.593156
Evergreen	S40T90T10	LQPTH_5	40	90	10	LQPTH	5	FC1	122	471	3	404	1000	0.168056
Evergreen	S40T90T10	LQPTH_5	40	90	10	LQPTH	5	FC5	120	313	5	562	1000	0.292941
Evergreen	S40T90T10	LQPTH_5	40	90	10	LQPTH	5	FC10	116	242	9	633	1000	0.362135
Evergreen	S40T90T10	LQPTH_5	40	90	10	LQPTH	5	MTeSPS	94	30	31	845	1000	0.720183
Evergreen	S40T90T10	LQPTH_5	40	90	10	LQPTH	5	MTP	114	210	11	665	1000	0.399457
Evergreen	S40T90T10	LQPTH_5	40	90	10	LQPTH	5	MTrSPS	101	87	24	788	1000	0.582707
Evergreen	S40T90T10	LQPTH_5	40	90	10	LQPTH	5	10PTP	101	85	24	790	1000	0.587902
Evergreen	S40T90T10	LQPTH_025	40	90	10	LQPTH	0.25	BTOPA	106	150	19	725	1000	0.466877
Evergreen	S40T90T10	LQPTH_025	40	90	10	LQPTH	0.25	EETOD	88	60	37	815	1000	0.588983
Evergreen	S40T90T10	LQPTH_025	40	90	10	LQPTH	0.25	ETeSS	99	98	26	777	1000	0.545371
Evergreen	S40T90T10	LQPTH_025	40	90	10	LQPTH	0.25	ETrSS	81	31	44	844	1000	0.641148
Evergreen	S40T90T10	LQPTH_025	40	90	10	LQPTH	0.25	FC1	114	241	11	634	1000	0.355911
Evergreen	S40T90T10	LQPTH_025	40	90	10	LQPTH	0.25	FC5	100	110	25	765	1000	0.522124
Evergreen	S40T90T10	LQPTH_025	40	90	10	LQPTH	0.25	FC10	90	64	35	811	1000	0.588358
Evergreen	S40T90T10	LQPTH_025	40	90	10	LQPTH	0.25	MTeSPS	99	98	26	777	1000	0.545371
Evergreen	S40T90T10	LQPTH_025	40	90	10	LQPTH	0.25	MTP	85	46	40	829	1000	0.614782
Evergreen	S40T90T10	LQPTH_025	40	90	10	LQPTH	0.25	MTrSPS	85	46	40	829	1000	0.614782
Evergreen	S40T90T10	LQPTH_025	40	90	10	LQPTH	0.25	10PTP	43	6	82	869	1000	0.455951
Evergreen	S40T90T10	PT_1	40	90	10	PT	1	BTOPA	113	204	12	671	1000	0.404549
Evergreen	S40T90T10	PT_1	40	90	10	PT	1	EETOD	106	137	19	738	1000	0.49227
Evergreen	S40T90T10	PT_1	40	90	10	PT	1	ETeSS	99	73	26	802	1000	0.610236
Evergreen	S40T90T10	PT_1	40	90	10	PT	1	ETrSS	101	96	24	779	1000	0.560037
Evergreen	S40T90T10	PT_1	40	90	10	PT	1	FC1	121	327	4	548	1000	0.281996
Evergreen	S40T90T10	PT_1	40	90	10	PT	1	FC5	113	190	12	685	1000	0.426544
Evergreen	S40T90T10	PT_1	40	90	10	PT	1	FC10	107	151	18	724	1000	0.469388
Evergreen	S40T90T10	PT_1	40	90	10	PT	1	MTeSPS	99	73	26	802	1000	0.610236
Evergreen	S40T90T10	PT_1	40	90	10	PT	1	MTP	107	140	18	735	1000	0.490733
Evergreen	S40T90T10	PT_1	40	90	10	PT	1	MTrSPS	102	115	23	760	1000	0.520417
Evergreen	S40T90T10	PT_1	40	90	10	PT	1	10PTP	99	79	26	796	1000	0.59381
Evergreen	S40T90T10	PT_3	40	90	10	PT	3	BTOPA	118	272	7	603	1000	0.331737
Evergreen	S40T90T10	PT_3	40	90	10	PT	3	EETOD	115	212	10	663	1000	0.400405
Evergreen	S40T90T10	PT_3	40	90	10	PT	3	ETeSS	86	28	39	847	1000	0.68171
Evergreen	S40T90T10	PT_3	40	90	10	PT	3	ETrSS	101	88	24	787	1000	0.580131
Evergreen	S40T90T10	PT_3	40	90	10	PT	3	FC1	122	398	3	477	1000	0.221359
Evergreen	S40T90T10	PT_3	40	90	10	PT	3	FC5	117	250	8	625	1000	0.355403
Evergreen	S40T90T10	PT_3	40	90	10	PT	3	FC10	112	195	13	680	1000	0.414497
Evergreen	S40T90T10	PT_3	40	90	10	PT	3	MTeSPS	86	28	39	847	1000	0.68171
Evergreen	S40T90T10	PT_3	40	90	10	PT	3	MTP	104	132	21	743	1000	0.493377
Evergreen	S40T90T10	PT_3	40	90	10	PT	3	MTrSPS	104	132	21	743	1000	0.493377
Evergreen	S40T90T10	PT_3	40	90	10	PT	3	10PTP	101	90	24	785	1000	0.575023
Evergreen	S40T90T10	PT_5	40	90	10	PT	5	BTOPA	119	322	6	553	1000	0.280307
Evergreen	S40T90T10	PT_5	40	90	10	PT	5	EETOD	118	299	7	576	1000	0.300971
Evergreen	S40T90T10	PT_5	40	90	10	PT	5	ETeSS	102	116	23	759	1000	0.518198
Evergreen	S40T90T10	PT_5	40	90	10	PT	5	ETrSS	96	89	29	786	1000	0.552607
Evergreen	S40T90T10	PT_5	40	90	10	PT	5	FC1	122	492	3	383	1000	0.154569
Evergreen	S40T90T10	PT_5	40	90	10	PT	5	FC5	119	322	6	553	1000	0.280307
Evergreen	S40T90T10	PT_5	40	90	10	PT	5	FC10	114	243	11	632	1000	0.353278
Evergreen	S40T90T10	PT_5	40	90	10	PT	5	MTeSPS	102	120	23	755	1000	0.509434
Evergreen	S40T90T10	PT_5	40	90	10	PT	5	MTP	113	205	12	670	1000	0.403026
Evergreen	S40T90T10	PT_5	40	90	10	PT	5	MTrSPS	98	91	27	784	1000	0.557638
Evergreen	S40T90T10	PT_5	40	90	10	PT	5	10PTP	102	111	23	764	1000	0.529412
Evergreen	S40T90T10	PT_025	40	90	10	PT	0.25	BTOPA	108	174	17	701	1000	0.432392
Evergreen	S40T90T10	PT_025	40	90	10	PT	0.25	EETOD	93	66	32	809	1000	0.598772
Evergreen	S40T90T10	PT_025	40	90	10	PT	0.25	ETeSS	103	112	22	763	1000	0.531878
Evergreen	S40T90T10	PT_025	40	90	10	PT	0.25	ETrSS	73	30	52	845	1000	0.594561
Evergreen	S40T90T10	PT_025	40	90	10	PT	0.25	FC1	113	452	12	423	1000	0.154442
Evergreen	S40T90T10	PT_025	40	90	10	PT	0.25	FC5	106	148	19	727	1000	0.470681
Evergreen	S40T90T10	PT_025	40	90	10	PT	0.25	FC10	96	77	29	798	1000	0.583906
Evergreen	S40T90T10	PT_025	40	90	10	PT	0.25	MTeSPS	103	112	22	763	1000	0.531878
Evergreen	S40T90T10	PT_025	40	90	10	PT	0.25	MTP	79	42	46	833	1000	0.592121
Evergreen	S40T90T10	PT_025	40	90	10	PT	0.25	MTrSPS	79	42	46	833	1000	0.592121
Evergreen	S40T90T10	PT_025	40	90	10	PT	0.25	10PTP	56	10	69	865	1000	0.547278
Evergreen	S40T90T10	Q_1	40	90	10	Q	1	BTOPA	122	434	3	441	1000	0.193727
Evergreen	S40T90T10	Q_1	40	90	10	Q	1	EETOD	115	274	10	601	1000	0.318536
Evergreen	S40T90T10	Q_1	40	90	10	Q	1	ETeSS	106	129	19	746	1000	0.508714
Evergreen	S40T90T10	Q_1	40	90	10	Q	1	ETrSS	105	127	20	748	1000	0.508361
Evergreen	S40T90T10	Q_1	40	90	10	Q	1	FC1	123	643	2	232	1000	0.0779128
Evergreen	S40T90T10	Q_1	40	90	10	Q	1	FC5	122	441	3	434	1000	0.188671
Evergreen	S40T90T10	Q_1	40	90	10	Q	1	FC10	119	320	6	555	1000	0.282334
Evergreen	S40T90T10	Q_1	40	90	10	Q	1	MTeSPS	96	46	29	829	1000	0.676026
Evergreen	S40T90T10	Q_1	40	90	10	Q	1	MTP	123	576	2	299	1000	0.109742
Evergreen	S40T90T10	Q_1	40	90	10	Q	1	MTrSPS	106	139	19	736	1000	0.488259
Evergreen	S40T90T10	Q_1	40	90	10	Q	1	10PTP	111	189	14	686	1000	0.42
Evergreen	S40T90T10	Q_3	40	90	10	Q	3	BTOPA	122	585	3	290	1000	0.102633
Evergreen	S40T90T10	Q_3	40	90	10	Q	3	EETOD	120	349	5	526	1000	0.257472
Evergreen	S40T90T10	Q_3	40	90	10	Q	3	ETeSS	101	73	24	802	1000	0.620352
Evergreen	S40T90T10	Q_3	40	90	10	Q	3	ETrSS	107	138	18	737	1000	0.494737
Evergreen	S40T90T10	Q_3	40	90	10	Q	3	FC1	123	660	2	215	1000	0.0705511
Evergreen	S40T90T10	Q_3	40	90	10	Q	3	FC5	122	493	3	382	1000	0.153945
Evergreen	S40T90T10	Q_3	40	90	10	Q	3	FC10	121	372	4	503	1000	0.24002
Evergreen	S40T90T10	Q_3	40	90	10	Q	3	MTeSPS	101	73	24	802	1000	0.620352
Evergreen	S40T90T10	Q_3	40	90	10	Q	3	MTP	123	649	2	226	1000	0.0752841
Evergreen	S40T90T10	Q_3	40	90	10	Q	3	MTrSPS	112	226	13	649	1000	0.36856
Evergreen	S40T90T10	Q_3	40	90	10	Q	3	10PTP	111	188	14	687	1000	0.421618
Evergreen	S40T90T10	Q_5	40	90	10	Q	5	BTOPA	122	571	3	304	1000	0.109732
Evergreen	S40T90T10	Q_5	40	90	10	Q	5	EETOD	119	352	6	523	1000	0.251438
Evergreen	S40T90T10	Q_5	40	90	10	Q	5	ETeSS	103	115	22	760	1000	0.52513
Evergreen	S40T90T10	Q_5	40	90	10	Q	5	ETrSS	107	146	18	729	1000	0.478952
Evergreen	S40T90T10	Q_5	40	90	10	Q	5	FC1	123	660	2	215	1000	0.0705511
Evergreen	S40T90T10	Q_5	40	90	10	Q	5	FC5	122	483	3	392	1000	0.160259
Evergreen	S40T90T10	Q_5	40	90	10	Q	5	FC10	120	374	5	501	1000	0.235116
Evergreen	S40T90T10	Q_5	40	90	10	Q	5	MTeSPS	103	115	22	760	1000	0.52513
Evergreen	S40T90T10	Q_5	40	90	10	Q	5	MTP	122	571	3	304	1000	0.109732
Evergreen	S40T90T10	Q_5	40	90	10	Q	5	MTrSPS	110	193	15	682	1000	0.40951
Evergreen	S40T90T10	Q_5	40	90	10	Q	5	10PTP	109	178	16	697	1000	0.429831
Evergreen	S40T90T10	Q_025	40	90	10	Q	0.25	BTOPA	121	411	4	464	1000	0.208015
Evergreen	S40T90T10	Q_025	40	90	10	Q	0.25	EETOD	118	272	7	603	1000	0.331737
Evergreen	S40T90T10	Q_025	40	90	10	Q	0.25	ETeSS	102	62	23	813	1000	0.657258
Evergreen	S40T90T10	Q_025	40	90	10	Q	0.25	ETrSS	106	119	19	756	1000	0.530213
Evergreen	S40T90T10	Q_025	40	90	10	Q	0.25	FC1	123	644	2	231	1000	0.0774723
Evergreen	S40T90T10	Q_025	40	90	10	Q	0.25	FC5	122	446	3	429	1000	0.185118
Evergreen	S40T90T10	Q_025	40	90	10	Q	0.25	FC10	120	327	5	548	1000	0.278653
Evergreen	S40T90T10	Q_025	40	90	10	Q	0.25	MTeSPS	102	62	23	813	1000	0.657258
Evergreen	S40T90T10	Q_025	40	90	10	Q	0.25	MTP	124	696	1	179	1000	0.0581081
Evergreen	S40T90T10	Q_025	40	90	10	Q	0.25	MTrSPS	106	124	19	751	1000	0.519328
Evergreen	S40T90T10	Q_025	40	90	10	Q	0.25	10PTP	111	185	14	690	1000	0.426513
Evergreen	S40T90T10	QH_1	40	90	10	QH	1	BTOPA	119	261	6	614	1000	0.34878
Evergreen	S40T90T10	QH_1	40	90	10	QH	1	EETOD	109	115	16	760	1000	0.552901
Evergreen	S40T90T10	QH_1	40	90	10	QH	1	ETeSS	102	67	23	808	1000	0.642502
Evergreen	S40T90T10	QH_1	40	90	10	QH	1	ETrSS	101	66	24	809	1000	0.64036
Evergreen	S40T90T10	QH_1	40	90	10	QH	1	FC1	122	392	3	483	1000	0.226249
Evergreen	S40T90T10	QH_1	40	90	10	QH	1	FC5	116	188	9	687	1000	0.441926
Evergreen	S40T90T10	QH_1	40	90	10	QH	1	FC10	109	118	16	757	1000	0.546147
Evergreen	S40T90T10	QH_1	40	90	10	QH	1	MTeSPS	102	67	23	808	1000	0.642502
Evergreen	S40T90T10	QH_1	40	90	10	QH	1	MTP	121	315	4	560	1000	0.294248
Evergreen	S40T90T10	QH_1	40	90	10	QH	1	MTrSPS	101	56	24	819	1000	0.670443
Evergreen	S40T90T10	QH_1	40	90	10	QH	1	10PTP	101	56	24	819	1000	0.670443
Evergreen	S40T90T10	QH_3	40	90	10	QH	3	BTOPA	122	465	3	410	1000	0.172048
Evergreen	S40T90T10	QH_3	40	90	10	QH	3	EETOD	116	240	9	635	1000	0.364796
Evergreen	S40T90T10	QH_3	40	90	10	QH	3	ETeSS	98	48	27	827	1000	0.680171
Evergreen	S40T90T10	QH_3	40	90	10	QH	3	ETrSS	103	99	22	776	1000	0.562387
Evergreen	S40T90T10	QH_3	40	90	10	QH	3	FC1	122	510	3	365	1000	0.143573
Evergreen	S40T90T10	QH_3	40	90	10	QH	3	FC5	121	338	4	537	1000	0.271177
Evergreen	S40T90T10	QH_3	40	90	10	QH	3	FC10	116	252	9	623	1000	0.349127
Evergreen	S40T90T10	QH_3	40	90	10	QH	3	MTeSPS	98	48	27	827	1000	0.680171
Evergreen	S40T90T10	QH_3	40	90	10	QH	3	MTP	122	465	3	410	1000	0.172048
Evergreen	S40T90T10	QH_3	40	90	10	QH	3	MTrSPS	110	126	15	749	1000	0.533113
Evergreen	S40T90T10	QH_3	40	90	10	QH	3	10PTP	103	99	22	776	1000	0.562387
Evergreen	S40T90T10	QH_5	40	90	10	QH	5	BTOPA	122	466	3	409	1000	0.171378
Evergreen	S40T90T10	QH_5	40	90	10	QH	5	EETOD	118	284	7	591	1000	0.317702
Evergreen	S40T90T10	QH_5	40	90	10	QH	5	ETeSS	100	75	25	800	1000	0.609756
Evergreen	S40T90T10	QH_5	40	90	10	QH	5	ETrSS	104	99	21	776	1000	0.567178
Evergreen	S40T90T10	QH_5	40	90	10	QH	5	FC1	122	547	3	328	1000	0.122457
Evergreen	S40T90T10	QH_5	40	90	10	QH	5	FC5	122	381	3	494	1000	0.235441
Evergreen	S40T90T10	QH_5	40	90	10	QH	5	FC10	119	294	6	581	1000	0.309948
Evergreen	S40T90T10	QH_5	40	90	10	QH	5	MTeSPS	100	75	25	800	1000	0.609756
Evergreen	S40T90T10	QH_5	40	90	10	QH	5	MTP	122	466	3	409	1000	0.171378
Evergreen	S40T90T10	QH_5	40	90	10	QH	5	MTrSPS	104	106	21	769	1000	0.550442
Evergreen	S40T90T10	QH_5	40	90	10	QH	5	10PTP	104	99	21	776	1000	0.567178
Evergreen	S40T90T10	QH_025	40	90	10	QH	0.25	BTOPA	112	177	13	698	1000	0.444038
Evergreen	S40T90T10	QH_025	40	90	10	QH	0.25	EETOD	104	87	21	788	1000	0.59739
Evergreen	S40T90T10	QH_025	40	90	10	QH	0.25	ETeSS	104	81	21	794	1000	0.61327
Evergreen	S40T90T10	QH_025	40	90	10	QH	0.25	ETrSS	99	55	26	820	1000	0.663202
Evergreen	S40T90T10	QH_025	40	90	10	QH	0.25	FC1	116	255	9	620	1000	0.345319
Evergreen	S40T90T10	QH_025	40	90	10	QH	0.25	FC5	107	146	18	729	1000	0.478952
Evergreen	S40T90T10	QH_025	40	90	10	QH	0.25	FC10	104	92	21	783	1000	0.584559
Evergreen	S40T90T10	QH_025	40	90	10	QH	0.25	MTeSPS	93	38	32	837	1000	0.68645
Evergreen	S40T90T10	QH_025	40	90	10	QH	0.25	MTP	108	146	17	729	1000	0.48336
Evergreen	S40T90T10	QH_025	40	90	10	QH	0.25	MTrSPS	104	89	21	786	1000	0.592215
Evergreen	S40T90T10	QH_025	40	90	10	QH	0.25	10PTP	97	46	28	829	1000	0.681378
Evergreen	S40T90T10	QP_1	40	90	10	QP	1	BTOPA	118	230	7	645	1000	0.38601
Evergreen	S40T90T10	QP_1	40	90	10	QP	1	EETOD	108	115	17	760	1000	0.548332
Evergreen	S40T90T10	QP_1	40	90	10	QP	1	ETeSS	103	61	22	814	1000	0.665323
Evergreen	S40T90T10	QP_1	40	90	10	QP	1	ETrSS	101	54	24	821	1000	0.676684
Evergreen	S40T90T10	QP_1	40	90	10	QP	1	FC1	118	253	7	622	1000	0.355239
Evergreen	S40T90T10	QP_1	40	90	10	QP	1	FC5	111	152	14	723	1000	0.484872
Evergreen	S40T90T10	QP_1	40	90	10	QP	1	FC10	107	106	18	769	1000	0.56453
Evergreen	S40T90T10	QP_1	40	90	10	QP	1	MTeSPS	103	61	22	814	1000	0.665323
Evergreen	S40T90T10	QP_1	40	90	10	QP	1	MTP	118	230	7	645	1000	0.38601
Evergreen	S40T90T10	QP_1	40	90	10	QP	1	MTrSPS	103	61	22	814	1000	0.665323
Evergreen	S40T90T10	QP_1	40	90	10	QP	1	10PTP	101	56	24	819	1000	0.670443
Evergreen	S40T90T10	QP_3	40	90	10	QP	3	BTOPA	118	280	7	595	1000	0.322314
Evergreen	S40T90T10	QP_3	40	90	10	QP	3	EETOD	115	207	10	668	1000	0.407913
Evergreen	S40T90T10	QP_3	40	90	10	QP	3	ETeSS	102	59	23	816	1000	0.666328
Evergreen	S40T90T10	QP_3	40	90	10	QP	3	ETrSS	102	77	23	798	1000	0.614272
Evergreen	S40T90T10	QP_3	40	90	10	QP	3	FC1	122	368	3	507	1000	0.246701
Evergreen	S40T90T10	QP_3	40	90	10	QP	3	FC5	118	248	7	627	1000	0.361702
Evergreen	S40T90T10	QP_3	40	90	10	QP	3	FC10	111	182	14	693	1000	0.431472
Evergreen	S40T90T10	QP_3	40	90	10	QP	3	MTeSPS	96	31	29	844	1000	0.727582
Evergreen	S40T90T10	QP_3	40	90	10	QP	3	MTP	117	225	8	650	1000	0.389253
Evergreen	S40T90T10	QP_3	40	90	10	QP	3	MTrSPS	102	79	23	796	1000	0.608821
Evergreen	S40T90T10	QP_3	40	90	10	QP	3	10PTP	102	79	23	796	1000	0.608821
Evergreen	S40T90T10	QP_5	40	90	10	QP	5	BTOPA	118	307	7	568	1000	0.292394
Evergreen	S40T90T10	QP_5	40	90	10	QP	5	EETOD	118	272	7	603	1000	0.331737
Evergreen	S40T90T10	QP_5	40	90	10	QP	5	ETeSS	101	84	24	791	1000	0.590521
Evergreen	S40T90T10	QP_5	40	90	10	QP	5	ETrSS	101	82	24	793	1000	0.595806
Evergreen	S40T90T10	QP_5	40	90	10	QP	5	FC1	122	429	3	446	1000	0.197399
Evergreen	S40T90T10	QP_5	40	90	10	QP	5	FC5	118	289	7	586	1000	0.312028
Evergreen	S40T90T10	QP_5	40	90	10	QP	5	FC10	115	229	10	646	1000	0.375979
Evergreen	S40T90T10	QP_5	40	90	10	QP	5	MTeSPS	101	84	24	791	1000	0.590521
Evergreen	S40T90T10	QP_5	40	90	10	QP	5	MTP	113	220	12	655	1000	0.380921
Evergreen	S40T90T10	QP_5	40	90	10	QP	5	MTrSPS	101	87	24	788	1000	0.582707
Evergreen	S40T90T10	QP_5	40	90	10	QP	5	10PTP	102	93	23	782	1000	0.57235
Evergreen	S40T90T10	QP_025	40	90	10	QP	0.25	BTOPA	118	209	7	666	1000	0.41661
Evergreen	S40T90T10	QP_025	40	90	10	QP	0.25	EETOD	109	94	16	781	1000	0.603246
Evergreen	S40T90T10	QP_025	40	90	10	QP	0.25	ETeSS	100	43	25	832	1000	0.707212
Evergreen	S40T90T10	QP_025	40	90	10	QP	0.25	ETrSS	105	62	20	813	1000	0.672328
Evergreen	S40T90T10	QP_025	40	90	10	QP	0.25	FC1	119	218	6	657	1000	0.407015
Evergreen	S40T90T10	QP_025	40	90	10	QP	0.25	FC5	114	123	11	752	1000	0.557391
Evergreen	S40T90T10	QP_025	40	90	10	QP	0.25	FC10	109	92	16	783	1000	0.608341
Evergreen	S40T90T10	QP_025	40	90	10	QP	0.25	MTeSPS	100	43	25	832	1000	0.707212
Evergreen	S40T90T10	QP_025	40	90	10	QP	0.25	MTP	118	209	7	666	1000	0.41661
Evergreen	S40T90T10	QP_025	40	90	10	QP	0.25	MTrSPS	106	82	19	793	1000	0.620301
Evergreen	S40T90T10	QP_025	40	90	10	QP	0.25	10PTP	105	64	20	811	1000	0.666336
Evergreen	S40T90T10	T_1	40	90	10	T	1	BTOPA	111	324	14	551	1000	0.25097
Evergreen	S40T90T10	T_1	40	90	10	T	1	EETOD	108	158	17	717	1000	0.460709
Evergreen	S40T90T10	T_1	40	90	10	T	1	ETeSS	110	169	15	706	1000	0.449514
Evergreen	S40T90T10	T_1	40	90	10	T	1	ETrSS	101	111	24	764	1000	0.524648
Evergreen	S40T90T10	T_1	40	90	10	T	1	FC1	124	685	1	190	1000	0.0625214
Evergreen	S40T90T10	T_1	40	90	10	T	1	FC5	114	416	11	459	1000	0.182775
Evergreen	S40T90T10	T_1	40	90	10	T	1	FC10	110	179	15	696	1000	0.432334
Evergreen	S40T90T10	T_1	40	90	10	T	1	MTeSPS	108	157	17	718	1000	0.462548
Evergreen	S40T90T10	T_1	40	90	10	T	1	MTP	108	160	17	715	1000	0.457055
Evergreen	S40T90T10	T_1	40	90	10	T	1	MTrSPS	99	76	26	799	1000	0.601951
Evergreen	S40T90T10	T_1	40	90	10	T	1	10PTP	93	61	32	814	1000	0.613306
Evergreen	S40T90T10	T_3	40	90	10	T	3	BTOPA	118	508	7	367	1000	0.133726
Evergreen	S40T90T10	T_3	40	90	10	T	3	EETOD	119	522	6	353	1000	0.128353
Evergreen	S40T90T10	T_3	40	90	10	T	3	ETeSS	107	147	18	728	1000	0.477021
Evergreen	S40T90T10	T_3	40	90	10	T	3	ETrSS	97	80	28	795	1000	0.580989
Evergreen	S40T90T10	T_3	40	90	10	T	3	FC1	124	854	1	21	1000	0.00407688
Evergreen	S40T90T10	T_3	40	90	10	T	3	FC5	121	645	4	230	1000	0.0721944
Evergreen	S40T90T10	T_3	40	90	10	T	3	FC10	120	539	5	336	1000	0.121518
Evergreen	S40T90T10	T_3	40	90	10	T	3	MTeSPS	108	148	17	727	1000	0.479495
Evergreen	S40T90T10	T_3	40	90	10	T	3	MTP	111	201	14	674	1000	0.401114
Evergreen	S40T90T10	T_3	40	90	10	T	3	MTrSPS	94	58	31	817	1000	0.627615
Evergreen	S40T90T10	T_3	40	90	10	T	3	10PTP	95	68	30	807	1000	0.60364
Evergreen	S40T90T10	T_5	40	90	10	T	5	BTOPA	116	455	9	420	1000	0.161319
Evergreen	S40T90T10	T_5	40	90	10	T	5	EETOD	118	501	7	374	1000	0.137887
Evergreen	S40T90T10	T_5	40	90	10	T	5	ETeSS	104	152	21	723	1000	0.454259
Evergreen	S40T90T10	T_5	40	90	10	T	5	ETrSS	97	77	28	798	1000	0.589041
Evergreen	S40T90T10	T_5	40	90	10	T	5	FC1	125	870	0	5	1000	0.00143472
Evergreen	S40T90T10	T_5	40	90	10	T	5	FC5	124	760	1	115	1000	0.034264
Evergreen	S40T90T10	T_5	40	90	10	T	5	FC10	118	548	7	327	1000	0.111289
Evergreen	S40T90T10	T_5	40	90	10	T	5	MTeSPS	107	164	18	711	1000	0.445545
Evergreen	S40T90T10	T_5	40	90	10	T	5	MTP	112	276	13	599	1000	0.305288
Evergreen	S40T90T10	T_5	40	90	10	T	5	MTrSPS	100	113	25	762	1000	0.515364
Evergreen	S40T90T10	T_5	40	90	10	T	5	10PTP	100	113	25	762	1000	0.515364
Evergreen	S40T90T10	T_025	40	90	10	T	0.25	BTOPA	109	196	16	679	1000	0.400707
Evergreen	S40T90T10	T_025	40	90	10	T	0.25	EETOD	93	68	32	807	1000	0.593082
Evergreen	S40T90T10	T_025	40	90	10	T	0.25	ETeSS	106	175	19	700	1000	0.422189
Evergreen	S40T90T10	T_025	40	90	10	T	0.25	ETrSS	77	26	48	849	1000	0.634116
Evergreen	S40T90T10	T_025	40	90	10	T	0.25	FC1	115	463	10	412	1000	0.153089
Evergreen	S40T90T10	T_025	40	90	10	T	0.25	FC5	106	155	19	720	1000	0.457521
Evergreen	S40T90T10	T_025	40	90	10	T	0.25	FC10	97	87	28	788	1000	0.562738
Evergreen	S40T90T10	T_025	40	90	10	T	0.25	MTeSPS	106	182	19	693	1000	0.410557
Evergreen	S40T90T10	T_025	40	90	10	T	0.25	MTP	87	59	38	816	1000	0.586354
Evergreen	S40T90T10	T_025	40	90	10	T	0.25	MTrSPS	78	30	47	845	1000	0.626214
Evergreen	S40T90T10	T_025	40	90	10	T	0.25	10PTP	64	16	61	859	1000	0.583784
Evergreen	S40T90T10	TQ_1	40	90	10	TQ	1	BTOPA	114	307	11	568	1000	0.278503
Evergreen	S40T90T10	TQ_1	40	90	10	TQ	1	EETOD	110	154	15	721	1000	0.47678
Evergreen	S40T90T10	TQ_1	40	90	10	TQ	1	ETeSS	103	90	22	785	1000	0.584801
Evergreen	S40T90T10	TQ_1	40	90	10	TQ	1	ETrSS	103	81	22	794	1000	0.608365
Evergreen	S40T90T10	TQ_1	40	90	10	TQ	1	FC1	122	634	3	241	1000	0.0794798
Evergreen	S40T90T10	TQ_1	40	90	10	TQ	1	FC5	115	354	10	521	1000	0.236497
Evergreen	S40T90T10	TQ_1	40	90	10	TQ	1	FC10	111	177	14	698	1000	0.439883
Evergreen	S40T90T10	TQ_1	40	90	10	TQ	1	MTeSPS	100	61	25	814	1000	0.650051
Evergreen	S40T90T10	TQ_1	40	90	10	TQ	1	MTP	114	298	11	577	1000	0.288018
Evergreen	S40T90T10	TQ_1	40	90	10	TQ	1	MTrSPS	98	47	27	828	1000	0.683422
Evergreen	S40T90T10	TQ_1	40	90	10	TQ	1	10PTP	98	56	27	819	1000	0.654886
Evergreen	S40T90T10	TQ_3	40	90	10	TQ	3	BTOPA	122	515	3	360	1000	0.140606
Evergreen	S40T90T10	TQ_3	40	90	10	TQ	3	EETOD	115	267	10	608	1000	0.326853
Evergreen	S40T90T10	TQ_3	40	90	10	TQ	3	ETeSS	101	55	24	820	1000	0.673554
Evergreen	S40T90T10	TQ_3	40	90	10	TQ	3	ETrSS	106	88	19	787	1000	0.604436
Evergreen	S40T90T10	TQ_3	40	90	10	TQ	3	FC1	122	580	3	295	1000	0.105142
Evergreen	S40T90T10	TQ_3	40	90	10	TQ	3	FC5	121	394	4	481	1000	0.221516
Evergreen	S40T90T10	TQ_3	40	90	10	TQ	3	FC10	115	283	10	592	1000	0.308146
Evergreen	S40T90T10	TQ_3	40	90	10	TQ	3	MTeSPS	94	30	31	845	1000	0.720183
Evergreen	S40T90T10	TQ_3	40	90	10	TQ	3	MTP	122	483	3	392	1000	0.160259
Evergreen	S40T90T10	TQ_3	40	90	10	TQ	3	MTrSPS	109	134	16	741	1000	0.511798
Evergreen	S40T90T10	TQ_3	40	90	10	TQ	3	10PTP	106	88	19	787	1000	0.604436
Evergreen	S40T90T10	TQ_5	40	90	10	TQ	5	BTOPA	122	557	3	318	1000	0.117067
Evergreen	S40T90T10	TQ_5	40	90	10	TQ	5	EETOD	120	380	5	495	1000	0.23
Evergreen	S40T90T10	TQ_5	40	90	10	TQ	5	ETeSS	102	98	23	777	1000	0.56
Evergreen	S40T90T10	TQ_5	40	90	10	TQ	5	ETrSS	105	114	20	761	1000	0.536733
Evergreen	S40T90T10	TQ_5	40	90	10	TQ	5	FC1	123	672	2	203	1000	0.0655113
Evergreen	S40T90T10	TQ_5	40	90	10	TQ	5	FC5	122	506	3	369	1000	0.145973
Evergreen	S40T90T10	TQ_5	40	90	10	TQ	5	FC10	122	397	3	478	1000	0.222168
Evergreen	S40T90T10	TQ_5	40	90	10	TQ	5	MTeSPS	102	98	23	777	1000	0.56
Evergreen	S40T90T10	TQ_5	40	90	10	TQ	5	MTP	122	557	3	318	1000	0.117067
Evergreen	S40T90T10	TQ_5	40	90	10	TQ	5	MTrSPS	109	168	16	707	1000	0.447032
Evergreen	S40T90T10	TQ_5	40	90	10	TQ	5	10PTP	108	145	17	730	1000	0.485306
Evergreen	S40T90T10	TQ_025	40	90	10	TQ	0.25	BTOPA	107	179	18	696	1000	0.419735
Evergreen	S40T90T10	TQ_025	40	90	10	TQ	0.25	EETOD	91	68	34	807	1000	0.582395
Evergreen	S40T90T10	TQ_025	40	90	10	TQ	0.25	ETeSS	98	96	27	779	1000	0.545287
Evergreen	S40T90T10	TQ_025	40	90	10	TQ	0.25	ETrSS	78	39	47	836	1000	0.59577
Evergreen	S40T90T10	TQ_025	40	90	10	TQ	0.25	FC1	116	469	9	406	1000	0.152106
Evergreen	S40T90T10	TQ_025	40	90	10	TQ	0.25	FC5	107	157	18	718	1000	0.458204
Evergreen	S40T90T10	TQ_025	40	90	10	TQ	0.25	FC10	98	95	27	780	1000	0.547729
Evergreen	S40T90T10	TQ_025	40	90	10	TQ	0.25	MTeSPS	98	97	27	778	1000	0.542857
Evergreen	S40T90T10	TQ_025	40	90	10	TQ	0.25	MTP	93	82	32	793	1000	0.555122
Evergreen	S40T90T10	TQ_025	40	90	10	TQ	0.25	MTrSPS	89	65	36	810	1000	0.580042
Evergreen	S40T90T10	TQ_025	40	90	10	TQ	0.25	10PTP	67	20	58	855	1000	0.590013
Evergreen	S60T50T50	Auto	60	50	50	Auto	1	BTOPA	109	171	16	704	1000	0.441791
Evergreen	S60T50T50	Auto	60	50	50	Auto	1	EETOD	99	72	26	803	1000	0.613031
Evergreen	S60T50T50	Auto	60	50	50	Auto	1	ETeSS	99	62	26	813	1000	0.641913
Evergreen	S60T50T50	Auto	60	50	50	Auto	1	ETrSS	97	41	28	834	1000	0.698031
Evergreen	S60T50T50	Auto	60	50	50	Auto	1	FC1	116	241	9	634	1000	0.363463
Evergreen	S60T50T50	Auto	60	50	50	Auto	1	FC5	103	116	22	759	1000	0.522904
Evergreen	S60T50T50	Auto	60	50	50	Auto	1	FC10	99	72	26	803	1000	0.613031
Evergreen	S60T50T50	Auto	60	50	50	Auto	1	MTeSPS	99	72	26	803	1000	0.613031
Evergreen	S60T50T50	Auto	60	50	50	Auto	1	MTP	102	111	23	764	1000	0.529412
Evergreen	S60T50T50	Auto	60	50	50	Auto	1	MTrSPS	99	59	26	816	1000	0.650924
Evergreen	S60T50T50	Auto	60	50	50	Auto	1	10PTP	94	32	31	843	1000	0.712984
Evergreen	S60T50T50	H_1	60	50	50	H	1	BTOPA	114	220	11	655	1000	0.38482
Evergreen	S60T50T50	H_1	60	50	50	H	1	EETOD	101	131	24	744	1000	0.481605
Evergreen	S60T50T50	H_1	60	50	50	H	1	ETeSS	99	83	26	792	1000	0.583174
Evergreen	S60T50T50	H_1	60	50	50	H	1	ETrSS	97	76	28	799	1000	0.591757
Evergreen	S60T50T50	H_1	60	50	50	H	1	FC1	124	644	1	231	1000	0.0798859
Evergreen	S60T50T50	H_1	60	50	50	H	1	FC5	114	222	11	653	1000	0.381963
Evergreen	S60T50T50	H_1	60	50	50	H	1	FC10	101	133	24	742	1000	0.477537
Evergreen	S60T50T50	H_1	60	50	50	H	1	MTeSPS	100	92	25	783	1000	0.565056
Evergreen	S60T50T50	H_1	60	50	50	H	1	MTP	100	104	25	771	1000	0.535971
Evergreen	S60T50T50	H_1	60	50	50	H	1	MTrSPS	100	97	25	778	1000	0.552704
Evergreen	S60T50T50	H_1	60	50	50	H	1	10PTP	93	52	32	823	1000	0.640642
Evergreen	S60T50T50	H_3	60	50	50	H	3	BTOPA	117	277	8	598	1000	0.322235
Evergreen	S60T50T50	H_3	60	50	50	H	3	EETOD	113	223	12	652	1000	0.376658
Evergreen	S60T50T50	H_3	60	50	50	H	3	ETeSS	98	82	27	793	1000	0.580769
Evergreen	S60T50T50	H_3	60	50	50	H	3	ETrSS	96	79	29	796	1000	0.578537
Evergreen	S60T50T50	H_3	60	50	50	H	3	FC1	125	693	0	182	1000	0.0616114
Evergreen	S60T50T50	H_3	60	50	50	H	3	FC5	121	366	4	509	1000	0.245283
Evergreen	S60T50T50	H_3	60	50	50	H	3	FC10	114	236	11	639	1000	0.362581
Evergreen	S60T50T50	H_3	60	50	50	H	3	MTeSPS	102	102	23	773	1000	0.55036
Evergreen	S60T50T50	H_3	60	50	50	H	3	MTP	102	119	23	756	1000	0.511608
Evergreen	S60T50T50	H_3	60	50	50	H	3	MTrSPS	101	91	24	784	1000	0.572491
Evergreen	S60T50T50	H_3	60	50	50	H	3	10PTP	95	74	30	801	1000	0.586892
Evergreen	S60T50T50	H_5	60	50	50	H	5	BTOPA	120	340	5	535	1000	0.265957
Evergreen	S60T50T50	H_5	60	50	50	H	5	EETOD	121	351	4	524	1000	0.258873
Evergreen	S60T50T50	H_5	60	50	50	H	5	ETeSS	100	126	25	749	1000	0.487267
Evergreen	S60T50T50	H_5	60	50	50	H	5	ETrSS	97	120	28	755	1000	0.485665
Evergreen	S60T50T50	H_5	60	50	50	H	5	FC1	125	718	0	157	1000	0.0518323
Evergreen	S60T50T50	H_5	60	50	50	H	5	FC5	122	455	3	420	1000	0.178844
Evergreen	S60T50T50	H_5	60	50	50	H	5	FC10	120	327	5	548	1000	0.278653
Evergreen	S60T50T50	H_5	60	50	50	H	5	MTeSPS	103	147	22	728	1000	0.4592
Evergreen	S60T50T50	H_5	60	50	50	H	5	MTP	113	208	12	667	1000	0.398496
Evergreen	S60T50T50	H_5	60	50	50	H	5	MTrSPS	102	130	23	745	1000	0.488294
Evergreen	S60T50T50	H_5	60	50	50	H	5	10PTP	102	131	23	744	1000	0.486239
Evergreen	S60T50T50	H_025	60	50	50	H	0.25	BTOPA	106	154	19	721	1000	0.459375
Evergreen	S60T50T50	H_025	60	50	50	H	0.25	EETOD	94	53	31	822	1000	0.642933
Evergreen	S60T50T50	H_025	60	50	50	H	0.25	ETeSS	98	64	27	811	1000	0.630832
Evergreen	S60T50T50	H_025	60	50	50	H	0.25	ETrSS	94	47	31	828	1000	0.661972
Evergreen	S60T50T50	H_025	60	50	50	H	0.25	FC1	115	238	10	637	1000	0.363695
Evergreen	S60T50T50	H_025	60	50	50	H	0.25	FC5	99	94	26	781	1000	0.555144
Evergreen	S60T50T50	H_025	60	50	50	H	0.25	FC10	96	58	29	817	1000	0.638254
Evergreen	S60T50T50	H_025	60	50	50	H	0.25	MTeSPS	99	80	26	795	1000	0.591128
Evergreen	S60T50T50	H_025	60	50	50	H	0.25	MTP	99	90	26	785	1000	0.565136
Evergreen	S60T50T50	H_025	60	50	50	H	0.25	MTrSPS	98	62	27	813	1000	0.636735
Evergreen	S60T50T50	H_025	60	50	50	H	0.25	10PTP	86	25	39	850	1000	0.692677
Evergreen	S60T50T50	L_1	60	50	50	L	1	BTOPA	117	227	8	648	1000	0.386423
Evergreen	S60T50T50	L_1	60	50	50	L	1	EETOD	109	167	16	708	1000	0.448795
Evergreen	S60T50T50	L_1	60	50	50	L	1	ETeSS	101	111	24	764	1000	0.524648
Evergreen	S60T50T50	L_1	60	50	50	L	1	ETrSS	98	109	27	766	1000	0.514719
Evergreen	S60T50T50	L_1	60	50	50	L	1	FC1	123	468	2	407	1000	0.172899
Evergreen	S60T50T50	L_1	60	50	50	L	1	FC5	118	262	7	613	1000	0.343902
Evergreen	S60T50T50	L_1	60	50	50	L	1	FC10	112	184	13	691	1000	0.432277
Evergreen	S60T50T50	L_1	60	50	50	L	1	MTeSPS	104	134	21	741	1000	0.489292
Evergreen	S60T50T50	L_1	60	50	50	L	1	MTP	108	165	17	710	1000	0.448067
Evergreen	S60T50T50	L_1	60	50	50	L	1	MTrSPS	103	128	22	747	1000	0.497066
Evergreen	S60T50T50	L_1	60	50	50	L	1	10PTP	102	115	23	760	1000	0.520417
Evergreen	S60T50T50	L_3	60	50	50	L	3	BTOPA	115	227	10	648	1000	0.378768
Evergreen	S60T50T50	L_3	60	50	50	L	3	EETOD	108	170	17	705	1000	0.43928
Evergreen	S60T50T50	L_3	60	50	50	L	3	ETeSS	99	110	26	765	1000	0.517303
Evergreen	S60T50T50	L_3	60	50	50	L	3	ETrSS	97	107	28	768	1000	0.514388
Evergreen	S60T50T50	L_3	60	50	50	L	3	FC1	122	452	3	423	1000	0.180918
Evergreen	S60T50T50	L_3	60	50	50	L	3	FC5	118	252	7	623	1000	0.356522
Evergreen	S60T50T50	L_3	60	50	50	L	3	FC10	110	177	15	698	1000	0.435709
Evergreen	S60T50T50	L_3	60	50	50	L	3	MTeSPS	102	127	23	748	1000	0.494524
Evergreen	S60T50T50	L_3	60	50	50	L	3	MTP	104	144	21	731	1000	0.469453
Evergreen	S60T50T50	L_3	60	50	50	L	3	MTrSPS	104	140	21	735	1000	0.477273
Evergreen	S60T50T50	L_3	60	50	50	L	3	10PTP	101	112	24	763	1000	0.522388
Evergreen	S60T50T50	L_5	60	50	50	L	5	BTOPA	117	260	8	615	1000	0.342735
Evergreen	S60T50T50	L_5	60	50	50	L	5	EETOD	113	223	12	652	1000	0.376658
Evergreen	S60T50T50	L_5	60	50	50	L	5	ETeSS	97	105	28	770	1000	0.518987
Evergreen	S60T50T50	L_5	60	50	50	L	5	ETrSS	101	116	24	759	1000	0.513467
Evergreen	S60T50T50	L_5	60	50	50	L	5	FC1	122	527	3	348	1000	0.133633
Evergreen	S60T50T50	L_5	60	50	50	L	5	FC5	118	302	7	573	1000	0.297727
Evergreen	S60T50T50	L_5	60	50	50	L	5	FC10	113	217	12	658	1000	0.385235
Evergreen	S60T50T50	L_5	60	50	50	L	5	MTeSPS	102	124	23	751	1000	0.500849
Evergreen	S60T50T50	L_5	60	50	50	L	5	MTP	107	180	18	695	1000	0.418075
Evergreen	S60T50T50	L_5	60	50	50	L	5	MTrSPS	104	146	21	729	1000	0.4656
Evergreen	S60T50T50	L_5	60	50	50	L	5	10PTP	103	128	22	747	1000	0.497066
Evergreen	S60T50T50	L_025	60	50	50	L	0.25	BTOPA	114	215	11	660	1000	0.392065
Evergreen	S60T50T50	L_025	60	50	50	L	0.25	EETOD	104	150	21	725	1000	0.458003
Evergreen	S60T50T50	L_025	60	50	50	L	0.25	ETeSS	97	105	28	770	1000	0.518987
Evergreen	S60T50T50	L_025	60	50	50	L	0.25	ETrSS	98	111	27	764	1000	0.510204
Evergreen	S60T50T50	L_025	60	50	50	L	0.25	FC1	122	444	3	431	1000	0.186533
Evergreen	S60T50T50	L_025	60	50	50	L	0.25	FC5	118	237	7	638	1000	0.376358
Evergreen	S60T50T50	L_025	60	50	50	L	0.25	FC10	108	167	17	708	1000	0.444528
Evergreen	S60T50T50	L_025	60	50	50	L	0.25	MTeSPS	102	125	23	750	1000	0.49873
Evergreen	S60T50T50	L_025	60	50	50	L	0.25	MTP	105	156	20	719	1000	0.451286
Evergreen	S60T50T50	L_025	60	50	50	L	0.25	MTrSPS	104	146	21	729	1000	0.4656
Evergreen	S60T50T50	L_025	60	50	50	L	0.25	10PTP	102	124	23	751	1000	0.500849
Evergreen	S60T50T50	LQ_1	60	50	50	LQ	1	BTOPA	120	229	5	646	1000	0.394958
Evergreen	S60T50T50	LQ_1	60	50	50	LQ	1	EETOD	108	113	17	762	1000	0.55288
Evergreen	S60T50T50	LQ_1	60	50	50	LQ	1	ETeSS	103	58	22	817	1000	0.674466
Evergreen	S60T50T50	LQ_1	60	50	50	LQ	1	ETrSS	103	55	22	820	1000	0.683778
Evergreen	S60T50T50	LQ_1	60	50	50	LQ	1	FC1	122	382	3	493	1000	0.234592
Evergreen	S60T50T50	LQ_1	60	50	50	LQ	1	FC5	117	196	8	679	1000	0.43294
Evergreen	S60T50T50	LQ_1	60	50	50	LQ	1	FC10	109	122	16	753	1000	0.537301
Evergreen	S60T50T50	LQ_1	60	50	50	LQ	1	MTeSPS	104	81	21	794	1000	0.61327
Evergreen	S60T50T50	LQ_1	60	50	50	LQ	1	MTP	114	151	11	724	1000	0.499614
Evergreen	S60T50T50	LQ_1	60	50	50	LQ	1	MTrSPS	104	77	21	798	1000	0.624161
Evergreen	S60T50T50	LQ_1	60	50	50	LQ	1	10PTP	103	50	22	825	1000	0.699687
Evergreen	S60T50T50	LQ_3	60	50	50	LQ	3	BTOPA	120	313	5	562	1000	0.292941
Evergreen	S60T50T50	LQ_3	60	50	50	LQ	3	EETOD	115	194	10	681	1000	0.428171
Evergreen	S60T50T50	LQ_3	60	50	50	LQ	3	ETeSS	102	66	23	809	1000	0.645418
Evergreen	S60T50T50	LQ_3	60	50	50	LQ	3	ETrSS	103	86	22	789	1000	0.595127
Evergreen	S60T50T50	LQ_3	60	50	50	LQ	3	FC1	122	524	3	351	1000	0.135357
Evergreen	S60T50T50	LQ_3	60	50	50	LQ	3	FC5	121	314	4	561	1000	0.295291
Evergreen	S60T50T50	LQ_3	60	50	50	LQ	3	FC10	117	200	8	675	1000	0.426602
Evergreen	S60T50T50	LQ_3	60	50	50	LQ	3	MTeSPS	102	82	23	793	1000	0.60076
Evergreen	S60T50T50	LQ_3	60	50	50	LQ	3	MTP	118	267	7	608	1000	0.337764
Evergreen	S60T50T50	LQ_3	60	50	50	LQ	3	MTrSPS	107	110	18	765	1000	0.555169
Evergreen	S60T50T50	LQ_3	60	50	50	LQ	3	10PTP	102	85	23	790	1000	0.592837
Evergreen	S60T50T50	LQ_5	60	50	50	LQ	5	BTOPA	120	298	5	577	1000	0.309008
Evergreen	S60T50T50	LQ_5	60	50	50	LQ	5	EETOD	116	208	9	667	1000	0.410326
Evergreen	S60T50T50	LQ_5	60	50	50	LQ	5	ETeSS	103	97	22	778	1000	0.567273
Evergreen	S60T50T50	LQ_5	60	50	50	LQ	5	ETrSS	103	90	22	785	1000	0.584801
Evergreen	S60T50T50	LQ_5	60	50	50	LQ	5	FC1	123	546	2	329	1000	0.125648
Evergreen	S60T50T50	LQ_5	60	50	50	LQ	5	FC5	120	317	5	558	1000	0.288791
Evergreen	S60T50T50	LQ_5	60	50	50	LQ	5	FC10	115	204	10	671	1000	0.412491
Evergreen	S60T50T50	LQ_5	60	50	50	LQ	5	MTeSPS	103	112	22	763	1000	0.531878
Evergreen	S60T50T50	LQ_5	60	50	50	LQ	5	MTP	113	196	12	679	1000	0.416959
Evergreen	S60T50T50	LQ_5	60	50	50	LQ	5	MTrSPS	105	127	20	748	1000	0.508361
Evergreen	S60T50T50	LQ_5	60	50	50	LQ	5	10PTP	103	92	22	783	1000	0.579724
Evergreen	S60T50T50	LQ_025	60	50	50	LQ	0.25	BTOPA	119	197	6	678	1000	0.439227
Evergreen	S60T50T50	LQ_025	60	50	50	LQ	0.25	EETOD	105	73	20	802	1000	0.640232
Evergreen	S60T50T50	LQ_025	60	50	50	LQ	0.25	ETeSS	104	62	21	813	1000	0.667335
Evergreen	S60T50T50	LQ_025	60	50	50	LQ	0.25	ETrSS	101	40	24	835	1000	0.722644
Evergreen	S60T50T50	LQ_025	60	50	50	LQ	0.25	FC1	120	256	5	619	1000	0.358722
Evergreen	S60T50T50	LQ_025	60	50	50	LQ	0.25	FC5	110	120	15	755	1000	0.546218
Evergreen	S60T50T50	LQ_025	60	50	50	LQ	0.25	FC10	105	72	20	803	1000	0.643065
Evergreen	S60T50T50	LQ_025	60	50	50	LQ	0.25	MTeSPS	105	78	20	797	1000	0.626311
Evergreen	S60T50T50	LQ_025	60	50	50	LQ	0.25	MTP	112	128	13	747	1000	0.537705
Evergreen	S60T50T50	LQ_025	60	50	50	LQ	0.25	MTrSPS	104	65	21	810	1000	0.658391
Evergreen	S60T50T50	LQ_025	60	50	50	LQ	0.25	10PTP	101	37	24	838	1000	0.733042
Evergreen	S60T50T50	LQP_1	60	50	50	LQP	1	BTOPA	114	190	11	685	1000	0.430595
Evergreen	S60T50T50	LQP_1	60	50	50	LQP	1	EETOD	104	96	21	779	1000	0.574545
Evergreen	S60T50T50	LQP_1	60	50	50	LQP	1	ETeSS	101	60	24	815	1000	0.658189
Evergreen	S60T50T50	LQP_1	60	50	50	LQP	1	ETrSS	101	54	24	821	1000	0.676684
Evergreen	S60T50T50	LQP_1	60	50	50	LQP	1	FC1	118	214	7	661	1000	0.409091
Evergreen	S60T50T50	LQP_1	60	50	50	LQP	1	FC5	106	124	19	751	1000	0.519328
Evergreen	S60T50T50	LQP_1	60	50	50	LQP	1	FC10	103	86	22	789	1000	0.595127
Evergreen	S60T50T50	LQP_1	60	50	50	LQP	1	MTeSPS	101	62	24	813	1000	0.652174
Evergreen	S60T50T50	LQP_1	60	50	50	LQP	1	MTP	105	109	20	766	1000	0.548161
Evergreen	S60T50T50	LQP_1	60	50	50	LQP	1	MTrSPS	101	60	24	815	1000	0.658189
Evergreen	S60T50T50	LQP_1	60	50	50	LQP	1	10PTP	101	47	24	828	1000	0.699153
Evergreen	S60T50T50	LQP_3	60	50	50	LQP	3	BTOPA	118	258	7	617	1000	0.348894
Evergreen	S60T50T50	LQP_3	60	50	50	LQP	3	EETOD	111	190	14	685	1000	0.418389
Evergreen	S60T50T50	LQP_3	60	50	50	LQP	3	ETeSS	100	75	25	800	1000	0.609756
Evergreen	S60T50T50	LQP_3	60	50	50	LQP	3	ETrSS	100	75	25	800	1000	0.609756
Evergreen	S60T50T50	LQP_3	60	50	50	LQP	3	FC1	121	368	4	507	1000	0.243518
Evergreen	S60T50T50	LQP_3	60	50	50	LQP	3	FC5	115	229	10	646	1000	0.375979
Evergreen	S60T50T50	LQP_3	60	50	50	LQP	3	FC10	108	166	17	709	1000	0.446293
Evergreen	S60T50T50	LQP_3	60	50	50	LQP	3	MTeSPS	102	80	23	795	1000	0.606119
Evergreen	S60T50T50	LQP_3	60	50	50	LQP	3	MTP	111	174	14	701	1000	0.445018
Evergreen	S60T50T50	LQP_3	60	50	50	LQP	3	MTrSPS	104	103	21	772	1000	0.557538
Evergreen	S60T50T50	LQP_3	60	50	50	LQP	3	10PTP	101	75	24	800	1000	0.614786
Evergreen	S60T50T50	LQP_5	60	50	50	LQP	5	BTOPA	119	302	6	573	1000	0.301191
Evergreen	S60T50T50	LQP_5	60	50	50	LQP	5	EETOD	114	227	11	648	1000	0.374918
Evergreen	S60T50T50	LQP_5	60	50	50	LQP	5	ETeSS	101	82	24	793	1000	0.595806
Evergreen	S60T50T50	LQP_5	60	50	50	LQP	5	ETrSS	99	65	26	810	1000	0.633065
Evergreen	S60T50T50	LQP_5	60	50	50	LQP	5	FC1	122	421	3	454	1000	0.203382
Evergreen	S60T50T50	LQP_5	60	50	50	LQP	5	FC5	118	271	7	604	1000	0.332933
Evergreen	S60T50T50	LQP_5	60	50	50	LQP	5	FC10	112	197	13	678	1000	0.411352
Evergreen	S60T50T50	LQP_5	60	50	50	LQP	5	MTeSPS	102	107	23	768	1000	0.538598
Evergreen	S60T50T50	LQP_5	60	50	50	LQP	5	MTP	109	165	16	710	1000	0.452345
Evergreen	S60T50T50	LQP_5	60	50	50	LQP	5	MTrSPS	101	100	24	775	1000	0.550317
Evergreen	S60T50T50	LQP_5	60	50	50	LQP	5	10PTP	97	62	28	813	1000	0.631525
Evergreen	S60T50T50	LQP_025	60	50	50	LQP	0.25	BTOPA	115	158	10	717	1000	0.490523
Evergreen	S60T50T50	LQP_025	60	50	50	LQP	0.25	EETOD	102	62	23	813	1000	0.657258
Evergreen	S60T50T50	LQP_025	60	50	50	LQP	0.25	ETeSS	101	46	24	829	1000	0.702444
Evergreen	S60T50T50	LQP_025	60	50	50	LQP	0.25	ETrSS	100	33	25	842	1000	0.741935
Evergreen	S60T50T50	LQP_025	60	50	50	LQP	0.25	FC1	116	176	9	699	1000	0.462209
Evergreen	S60T50T50	LQP_025	60	50	50	LQP	0.25	FC5	107	95	18	780	1000	0.59132
Evergreen	S60T50T50	LQP_025	60	50	50	LQP	0.25	FC10	102	62	23	813	1000	0.657258
Evergreen	S60T50T50	LQP_025	60	50	50	LQP	0.25	MTeSPS	102	63	23	812	1000	0.654271
Evergreen	S60T50T50	LQP_025	60	50	50	LQP	0.25	MTP	109	109	16	766	1000	0.566724
Evergreen	S60T50T50	LQP_025	60	50	50	LQP	0.25	MTrSPS	101	39	24	836	1000	0.726087
Evergreen	S60T50T50	LQP_025	60	50	50	LQP	0.25	10PTP	97	25	28	850	1000	0.755196
Evergreen	S60T50T50	LQPT_1	60	50	50	LQPT	1	BTOPA	113	205	12	670	1000	0.403026
Evergreen	S60T50T50	LQPT_1	60	50	50	LQPT	1	EETOD	102	102	23	773	1000	0.55036
Evergreen	S60T50T50	LQPT_1	60	50	50	LQPT	1	ETeSS	100	84	25	791	1000	0.585551
Evergreen	S60T50T50	LQPT_1	60	50	50	LQPT	1	ETrSS	99	65	26	810	1000	0.633065
Evergreen	S60T50T50	LQPT_1	60	50	50	LQPT	1	FC1	121	335	4	540	1000	0.27409
Evergreen	S60T50T50	LQPT_1	60	50	50	LQPT	1	FC5	109	179	16	696	1000	0.428152
Evergreen	S60T50T50	LQPT_1	60	50	50	LQPT	1	FC10	103	115	22	760	1000	0.52513
Evergreen	S60T50T50	LQPT_1	60	50	50	LQPT	1	MTeSPS	101	89	24	786	1000	0.57757
Evergreen	S60T50T50	LQPT_1	60	50	50	LQPT	1	MTP	107	148	18	727	1000	0.475099
Evergreen	S60T50T50	LQPT_1	60	50	50	LQPT	1	MTrSPS	99	68	26	807	1000	0.624376
Evergreen	S60T50T50	LQPT_1	60	50	50	LQPT	1	10PTP	94	45	31	830	1000	0.668484
Evergreen	S60T50T50	LQPT_3	60	50	50	LQPT	3	BTOPA	115	242	10	633	1000	0.35837
Evergreen	S60T50T50	LQPT_3	60	50	50	LQPT	3	EETOD	109	171	16	704	1000	0.441791
Evergreen	S60T50T50	LQPT_3	60	50	50	LQPT	3	ETeSS	99	63	26	812	1000	0.638945
Evergreen	S60T50T50	LQPT_3	60	50	50	LQPT	3	ETrSS	97	52	28	823	1000	0.662091
Evergreen	S60T50T50	LQPT_3	60	50	50	LQPT	3	FC1	121	342	4	533	1000	0.267337
Evergreen	S60T50T50	LQPT_3	60	50	50	LQPT	3	FC5	112	209	13	666	1000	0.393028
Evergreen	S60T50T50	LQPT_3	60	50	50	LQPT	3	FC10	105	148	20	727	1000	0.466243
Evergreen	S60T50T50	LQPT_3	60	50	50	LQPT	3	MTeSPS	99	73	26	802	1000	0.610236
Evergreen	S60T50T50	LQPT_3	60	50	50	LQPT	3	MTP	104	130	21	745	1000	0.497504
Evergreen	S60T50T50	LQPT_3	60	50	50	LQPT	3	MTrSPS	96	52	29	823	1000	0.65678
Evergreen	S60T50T50	LQPT_3	60	50	50	LQPT	3	10PTP	94	47	31	828	1000	0.661972
Evergreen	S60T50T50	LQPT_5	60	50	50	LQPT	5	BTOPA	119	306	6	569	1000	0.296901
Evergreen	S60T50T50	LQPT_5	60	50	50	LQPT	5	EETOD	115	244	10	631	1000	0.355739
Evergreen	S60T50T50	LQPT_5	60	50	50	LQPT	5	ETeSS	101	78	24	797	1000	0.606557
Evergreen	S60T50T50	LQPT_5	60	50	50	LQPT	5	ETrSS	101	74	24	801	1000	0.617561
Evergreen	S60T50T50	LQPT_5	60	50	50	LQPT	5	FC1	122	442	3	433	1000	0.187956
Evergreen	S60T50T50	LQPT_5	60	50	50	LQPT	5	FC5	119	286	6	589	1000	0.31895
Evergreen	S60T50T50	LQPT_5	60	50	50	LQPT	5	FC10	113	209	12	666	1000	0.396999
Evergreen	S60T50T50	LQPT_5	60	50	50	LQPT	5	MTeSPS	104	118	21	757	1000	0.523156
Evergreen	S60T50T50	LQPT_5	60	50	50	LQPT	5	MTP	105	142	20	733	1000	0.47784
Evergreen	S60T50T50	LQPT_5	60	50	50	LQPT	5	MTrSPS	103	95	22	780	1000	0.572212
Evergreen	S60T50T50	LQPT_5	60	50	50	LQPT	5	10PTP	100	71	25	804	1000	0.620928
Evergreen	S60T50T50	LQPT_025	60	50	50	LQPT	0.25	BTOPA	108	210	17	665	1000	0.375516
Evergreen	S60T50T50	LQPT_025	60	50	50	LQPT	0.25	EETOD	89	72	36	803	1000	0.560529
Evergreen	S60T50T50	LQPT_025	60	50	50	LQPT	0.25	ETeSS	103	166	22	709	1000	0.424637
Evergreen	S60T50T50	LQPT_025	60	50	50	LQPT	0.25	ETrSS	83	45	42	830	1000	0.606335
Evergreen	S60T50T50	LQPT_025	60	50	50	LQPT	0.25	FC1	119	501	6	374	1000	0.140678
Evergreen	S60T50T50	LQPT_025	60	50	50	LQPT	0.25	FC5	104	177	21	698	1000	0.410276
Evergreen	S60T50T50	LQPT_025	60	50	50	LQPT	0.25	FC10	93	88	32	787	1000	0.539789
Evergreen	S60T50T50	LQPT_025	60	50	50	LQPT	0.25	MTeSPS	107	187	18	688	1000	0.406657
Evergreen	S60T50T50	LQPT_025	60	50	50	LQPT	0.25	MTP	92	87	33	788	1000	0.537126
Evergreen	S60T50T50	LQPT_025	60	50	50	LQPT	0.25	MTrSPS	79	30	46	845	1000	0.632406
Evergreen	S60T50T50	LQPT_025	60	50	50	LQPT	0.25	10PTP	65	4	60	871	1000	0.637907
Evergreen	S60T50T50	LQPTH_1	60	50	50	LQPTH	1	BTOPA	112	198	13	677	1000	0.40979
Evergreen	S60T50T50	LQPTH_1	60	50	50	LQPTH	1	EETOD	100	116	25	759	1000	0.508711
Evergreen	S60T50T50	LQPTH_1	60	50	50	LQPTH	1	ETeSS	99	84	26	791	1000	0.580553
Evergreen	S60T50T50	LQPTH_1	60	50	50	LQPTH	1	ETrSS	97	53	28	822	1000	0.658947
Evergreen	S60T50T50	LQPTH_1	60	50	50	LQPTH	1	FC1	119	358	6	517	1000	0.245987
Evergreen	S60T50T50	LQPTH_1	60	50	50	LQPTH	1	FC5	110	182	15	693	1000	0.427326
Evergreen	S60T50T50	LQPTH_1	60	50	50	LQPTH	1	FC10	100	119	25	756	1000	0.502161
Evergreen	S60T50T50	LQPTH_1	60	50	50	LQPTH	1	MTeSPS	99	62	26	813	1000	0.641913
Evergreen	S60T50T50	LQPTH_1	60	50	50	LQPTH	1	MTP	101	122	24	753	1000	0.500428
Evergreen	S60T50T50	LQPTH_1	60	50	50	LQPTH	1	MTrSPS	99	61	26	814	1000	0.644898
Evergreen	S60T50T50	LQPTH_1	60	50	50	LQPTH	1	10PTP	92	22	33	853	1000	0.738717
Evergreen	S60T50T50	LQPTH_3	60	50	50	LQPTH	3	BTOPA	114	227	11	648	1000	0.374918
Evergreen	S60T50T50	LQPTH_3	60	50	50	LQPTH	3	EETOD	105	158	20	717	1000	0.447634
Evergreen	S60T50T50	LQPTH_3	60	50	50	LQPTH	3	ETeSS	98	70	27	805	1000	0.613546
Evergreen	S60T50T50	LQPTH_3	60	50	50	LQPTH	3	ETrSS	98	72	27	803	1000	0.607921
Evergreen	S60T50T50	LQPTH_3	60	50	50	LQPTH	3	FC1	118	325	7	550	1000	0.27392
Evergreen	S60T50T50	LQPTH_3	60	50	50	LQPTH	3	FC5	112	201	13	674	1000	0.405142
Evergreen	S60T50T50	LQPTH_3	60	50	50	LQPTH	3	FC10	105	156	20	719	1000	0.451286
Evergreen	S60T50T50	LQPTH_3	60	50	50	LQPTH	3	MTeSPS	100	91	25	784	1000	0.567568
Evergreen	S60T50T50	LQPTH_3	60	50	50	LQPTH	3	MTP	105	154	20	721	1000	0.454973
Evergreen	S60T50T50	LQPTH_3	60	50	50	LQPTH	3	MTrSPS	98	79	27	796	1000	0.588749
Evergreen	S60T50T50	LQPTH_3	60	50	50	LQPTH	3	10PTP	93	51	32	824	1000	0.643777
Evergreen	S60T50T50	LQPTH_5	60	50	50	LQPTH	5	BTOPA	118	297	7	578	1000	0.303152
Evergreen	S60T50T50	LQPTH_5	60	50	50	LQPTH	5	EETOD	112	231	13	644	1000	0.361674
Evergreen	S60T50T50	LQPTH_5	60	50	50	LQPTH	5	ETeSS	99	70	26	805	1000	0.618669
Evergreen	S60T50T50	LQPTH_5	60	50	50	LQPTH	5	ETrSS	99	66	26	809	1000	0.630151
Evergreen	S60T50T50	LQPTH_5	60	50	50	LQPTH	5	FC1	121	424	4	451	1000	0.198126
Evergreen	S60T50T50	LQPTH_5	60	50	50	LQPTH	5	FC5	117	274	8	601	1000	0.325762
Evergreen	S60T50T50	LQPTH_5	60	50	50	LQPTH	5	FC10	111	206	14	669	1000	0.393522
Evergreen	S60T50T50	LQPTH_5	60	50	50	LQPTH	5	MTeSPS	101	89	24	786	1000	0.57757
Evergreen	S60T50T50	LQPTH_5	60	50	50	LQPTH	5	MTP	104	133	21	742	1000	0.491329
Evergreen	S60T50T50	LQPTH_5	60	50	50	LQPTH	5	MTrSPS	100	82	25	793	1000	0.590822
Evergreen	S60T50T50	LQPTH_5	60	50	50	LQPTH	5	10PTP	98	65	27	810	1000	0.627907
Evergreen	S60T50T50	LQPTH_025	60	50	50	LQPTH	0.25	BTOPA	99	162	26	713	1000	0.413874
Evergreen	S60T50T50	LQPTH_025	60	50	50	LQPTH	0.25	EETOD	86	56	39	819	1000	0.589633
Evergreen	S60T50T50	LQPTH_025	60	50	50	LQPTH	0.25	ETeSS	99	162	26	713	1000	0.413874
Evergreen	S60T50T50	LQPTH_025	60	50	50	LQPTH	0.25	ETrSS	85	45	40	830	1000	0.617978
Evergreen	S60T50T50	LQPTH_025	60	50	50	LQPTH	0.25	FC1	115	355	10	520	1000	0.235602
Evergreen	S60T50T50	LQPTH_025	60	50	50	LQPTH	0.25	FC5	96	107	29	768	1000	0.509468
Evergreen	S60T50T50	LQPTH_025	60	50	50	LQPTH	0.25	FC10	91	69	34	806	1000	0.579592
Evergreen	S60T50T50	LQPTH_025	60	50	50	LQPTH	0.25	MTeSPS	103	200	22	675	1000	0.369766
Evergreen	S60T50T50	LQPTH_025	60	50	50	LQPTH	0.25	MTP	93	85	32	790	1000	0.547389
Evergreen	S60T50T50	LQPTH_025	60	50	50	LQPTH	0.25	MTrSPS	70	9	55	866	1000	0.652646
Evergreen	S60T50T50	LQPTH_025	60	50	50	LQPTH	0.25	10PTP	44	3	81	872	1000	0.475819
Evergreen	S60T50T50	PT_1	60	50	50	PT	1	BTOPA	112	204	13	671	1000	0.400552
Evergreen	S60T50T50	PT_1	60	50	50	PT	1	EETOD	102	120	23	755	1000	0.509434
Evergreen	S60T50T50	PT_1	60	50	50	PT	1	ETeSS	98	98	27	777	1000	0.540441
Evergreen	S60T50T50	PT_1	60	50	50	PT	1	ETrSS	94	74	31	801	1000	0.581673
Evergreen	S60T50T50	PT_1	60	50	50	PT	1	FC1	121	356	4	519	1000	0.254272
Evergreen	S60T50T50	PT_1	60	50	50	PT	1	FC5	112	188	13	687	1000	0.425714
Evergreen	S60T50T50	PT_1	60	50	50	PT	1	FC10	102	130	23	745	1000	0.488294
Evergreen	S60T50T50	PT_1	60	50	50	PT	1	MTeSPS	100	105	25	770	1000	0.533632
Evergreen	S60T50T50	PT_1	60	50	50	PT	1	MTP	104	144	21	731	1000	0.469453
Evergreen	S60T50T50	PT_1	60	50	50	PT	1	MTrSPS	93	58	32	817	1000	0.622246
Evergreen	S60T50T50	PT_1	60	50	50	PT	1	10PTP	91	39	34	836	1000	0.67191
Evergreen	S60T50T50	PT_3	60	50	50	PT	3	BTOPA	116	239	9	636	1000	0.366134
Evergreen	S60T50T50	PT_3	60	50	50	PT	3	EETOD	111	182	14	693	1000	0.431472
Evergreen	S60T50T50	PT_3	60	50	50	PT	3	ETeSS	98	79	27	796	1000	0.588749
Evergreen	S60T50T50	PT_3	60	50	50	PT	3	ETrSS	95	74	30	801	1000	0.586892
Evergreen	S60T50T50	PT_3	60	50	50	PT	3	FC1	121	360	4	515	1000	0.250643
Evergreen	S60T50T50	PT_3	60	50	50	PT	3	FC5	113	218	12	657	1000	0.383791
Evergreen	S60T50T50	PT_3	60	50	50	PT	3	FC10	110	166	15	709	1000	0.454819
Evergreen	S60T50T50	PT_3	60	50	50	PT	3	MTeSPS	99	82	26	793	1000	0.58581
Evergreen	S60T50T50	PT_3	60	50	50	PT	3	MTP	102	126	23	749	1000	0.496622
Evergreen	S60T50T50	PT_3	60	50	50	PT	3	MTrSPS	98	79	27	796	1000	0.588749
Evergreen	S60T50T50	PT_3	60	50	50	PT	3	10PTP	92	60	33	815	1000	0.610879
Evergreen	S60T50T50	PT_5	60	50	50	PT	5	BTOPA	116	282	9	593	1000	0.312869
Evergreen	S60T50T50	PT_5	60	50	50	PT	5	EETOD	113	242	12	633	1000	0.350799
Evergreen	S60T50T50	PT_5	60	50	50	PT	5	ETeSS	95	83	30	792	1000	0.562863
Evergreen	S60T50T50	PT_5	60	50	50	PT	5	ETrSS	96	83	29	792	1000	0.567985
Evergreen	S60T50T50	PT_5	60	50	50	PT	5	FC1	121	397	4	478	1000	0.219085
Evergreen	S60T50T50	PT_5	60	50	50	PT	5	FC5	114	264	11	611	1000	0.326805
Evergreen	S60T50T50	PT_5	60	50	50	PT	5	FC10	110	204	15	671	1000	0.39251
Evergreen	S60T50T50	PT_5	60	50	50	PT	5	MTeSPS	101	108	24	767	1000	0.5315
Evergreen	S60T50T50	PT_5	60	50	50	PT	5	MTP	103	141	22	734	1000	0.470779
Evergreen	S60T50T50	PT_5	60	50	50	PT	5	MTrSPS	102	130	23	745	1000	0.488294
Evergreen	S60T50T50	PT_5	60	50	50	PT	5	10PTP	97	98	28	777	1000	0.535484
Evergreen	S60T50T50	PT_025	60	50	50	PT	0.25	BTOPA	106	154	19	721	1000	0.459375
Evergreen	S60T50T50	PT_025	60	50	50	PT	0.25	EETOD	91	60	34	815	1000	0.605456
Evergreen	S60T50T50	PT_025	60	50	50	PT	0.25	ETeSS	103	139	22	736	1000	0.474715
Evergreen	S60T50T50	PT_025	60	50	50	PT	0.25	ETrSS	91	60	34	815	1000	0.605456
Evergreen	S60T50T50	PT_025	60	50	50	PT	0.25	FC1	118	430	7	445	1000	0.184701
Evergreen	S60T50T50	PT_025	60	50	50	PT	0.25	FC5	106	146	19	729	1000	0.474522
Evergreen	S60T50T50	PT_025	60	50	50	PT	0.25	FC10	93	84	32	791	1000	0.549952
Evergreen	S60T50T50	PT_025	60	50	50	PT	0.25	MTeSPS	106	166	19	709	1000	0.43769
Evergreen	S60T50T50	PT_025	60	50	50	PT	0.25	MTP	93	86	32	789	1000	0.544841
Evergreen	S60T50T50	PT_025	60	50	50	PT	0.25	MTrSPS	83	38	42	837	1000	0.6292
Evergreen	S60T50T50	PT_025	60	50	50	PT	0.25	10PTP	57	7	68	868	1000	0.566474
Evergreen	S60T50T50	Q_1	60	50	50	Q	1	BTOPA	122	464	3	411	1000	0.172719
Evergreen	S60T50T50	Q_1	60	50	50	Q	1	EETOD	112	241	13	634	1000	0.3483
Evergreen	S60T50T50	Q_1	60	50	50	Q	1	ETeSS	105	128	20	747	1000	0.506255
Evergreen	S60T50T50	Q_1	60	50	50	Q	1	ETrSS	104	106	21	769	1000	0.550442
Evergreen	S60T50T50	Q_1	60	50	50	Q	1	FC1	123	615	2	260	1000	0.0906411
Evergreen	S60T50T50	Q_1	60	50	50	Q	1	FC5	121	421	4	454	1000	0.200376
Evergreen	S60T50T50	Q_1	60	50	50	Q	1	FC10	117	292	8	583	1000	0.305153
Evergreen	S60T50T50	Q_1	60	50	50	Q	1	MTeSPS	110	184	15	691	1000	0.424023
Evergreen	S60T50T50	Q_1	60	50	50	Q	1	MTP	120	355	5	520	1000	0.251948
Evergreen	S60T50T50	Q_1	60	50	50	Q	1	MTrSPS	109	176	16	699	1000	0.43321
Evergreen	S60T50T50	Q_1	60	50	50	Q	1	10PTP	104	115	21	760	1000	0.529818
Evergreen	S60T50T50	Q_3	60	50	50	Q	3	BTOPA	122	399	3	476	1000	0.220553
Evergreen	S60T50T50	Q_3	60	50	50	Q	3	EETOD	115	269	10	606	1000	0.324455
Evergreen	S60T50T50	Q_3	60	50	50	Q	3	ETeSS	103	114	22	761	1000	0.527368
Evergreen	S60T50T50	Q_3	60	50	50	Q	3	ETrSS	103	121	22	754	1000	0.511945
Evergreen	S60T50T50	Q_3	60	50	50	Q	3	FC1	122	597	3	278	1000	0.0967256
Evergreen	S60T50T50	Q_3	60	50	50	Q	3	FC5	122	408	3	467	1000	0.213397
Evergreen	S60T50T50	Q_3	60	50	50	Q	3	FC10	117	288	8	587	1000	0.309621
Evergreen	S60T50T50	Q_3	60	50	50	Q	3	MTeSPS	104	144	21	731	1000	0.469453
Evergreen	S60T50T50	Q_3	60	50	50	Q	3	MTP	117	280	8	595	1000	0.318746
Evergreen	S60T50T50	Q_3	60	50	50	Q	3	MTrSPS	108	164	17	711	1000	0.449848
Evergreen	S60T50T50	Q_3	60	50	50	Q	3	10PTP	104	137	21	738	1000	0.483238
Evergreen	S60T50T50	Q_5	60	50	50	Q	5	BTOPA	121	393	4	482	1000	0.222331
Evergreen	S60T50T50	Q_5	60	50	50	Q	5	EETOD	116	282	9	593	1000	0.312869
Evergreen	S60T50T50	Q_5	60	50	50	Q	5	ETeSS	102	103	23	772	1000	0.547982
Evergreen	S60T50T50	Q_5	60	50	50	Q	5	ETrSS	102	94	23	781	1000	0.569853
Evergreen	S60T50T50	Q_5	60	50	50	Q	5	FC1	122	553	3	322	1000	0.119208
Evergreen	S60T50T50	Q_5	60	50	50	Q	5	FC5	121	384	4	491	1000	0.229777
Evergreen	S60T50T50	Q_5	60	50	50	Q	5	FC10	116	285	9	590	1000	0.309454
Evergreen	S60T50T50	Q_5	60	50	50	Q	5	MTeSPS	104	147	21	728	1000	0.463687
Evergreen	S60T50T50	Q_5	60	50	50	Q	5	MTP	117	298	8	577	1000	0.298567
Evergreen	S60T50T50	Q_5	60	50	50	Q	5	MTrSPS	104	143	21	732	1000	0.471394
Evergreen	S60T50T50	Q_5	60	50	50	Q	5	10PTP	102	97	23	778	1000	0.562443
Evergreen	S60T50T50	Q_025	60	50	50	Q	0.25	BTOPA	121	403	4	472	1000	0.214286
Evergreen	S60T50T50	Q_025	60	50	50	Q	0.25	EETOD	109	197	16	678	1000	0.399154
Evergreen	S60T50T50	Q_025	60	50	50	Q	0.25	ETeSS	105	130	20	745	1000	0.502075
Evergreen	S60T50T50	Q_025	60	50	50	Q	0.25	ETrSS	104	94	21	781	1000	0.579525
Evergreen	S60T50T50	Q_025	60	50	50	Q	0.25	FC1	123	631	2	244	1000	0.083273
Evergreen	S60T50T50	Q_025	60	50	50	Q	0.25	FC5	121	407	4	468	1000	0.211132
Evergreen	S60T50T50	Q_025	60	50	50	Q	0.25	FC10	115	256	10	619	1000	0.34036
Evergreen	S60T50T50	Q_025	60	50	50	Q	0.25	MTeSPS	106	138	19	737	1000	0.49026
Evergreen	S60T50T50	Q_025	60	50	50	Q	0.25	MTP	121	376	4	499	1000	0.236565
Evergreen	S60T50T50	Q_025	60	50	50	Q	0.25	MTrSPS	106	142	19	733	1000	0.482315
Evergreen	S60T50T50	Q_025	60	50	50	Q	0.25	10PTP	104	91	21	784	1000	0.587097
Evergreen	S60T50T50	QH_1	60	50	50	QH	1	BTOPA	116	228	9	647	1000	0.381201
Evergreen	S60T50T50	QH_1	60	50	50	QH	1	EETOD	102	95	23	780	1000	0.567369
Evergreen	S60T50T50	QH_1	60	50	50	QH	1	ETeSS	99	62	26	813	1000	0.641913
Evergreen	S60T50T50	QH_1	60	50	50	QH	1	ETrSS	97	50	28	825	1000	0.668438
Evergreen	S60T50T50	QH_1	60	50	50	QH	1	FC1	122	492	3	383	1000	0.154569
Evergreen	S60T50T50	QH_1	60	50	50	QH	1	FC5	110	174	15	701	1000	0.440828
Evergreen	S60T50T50	QH_1	60	50	50	QH	1	FC10	102	98	23	777	1000	0.56
Evergreen	S60T50T50	QH_1	60	50	50	QH	1	MTeSPS	102	98	23	777	1000	0.56
Evergreen	S60T50T50	QH_1	60	50	50	QH	1	MTP	102	117	23	758	1000	0.51599
Evergreen	S60T50T50	QH_1	60	50	50	QH	1	MTrSPS	98	55	27	820	1000	0.657977
Evergreen	S60T50T50	QH_1	60	50	50	QH	1	10PTP	97	35	28	840	1000	0.71875
Evergreen	S60T50T50	QH_3	60	50	50	QH	3	BTOPA	119	336	6	539	1000	0.266488
Evergreen	S60T50T50	QH_3	60	50	50	QH	3	EETOD	113	221	12	654	1000	0.379494
Evergreen	S60T50T50	QH_3	60	50	50	QH	3	ETeSS	99	79	26	796	1000	0.59381
Evergreen	S60T50T50	QH_3	60	50	50	QH	3	ETrSS	101	85	24	790	1000	0.587902
Evergreen	S60T50T50	QH_3	60	50	50	QH	3	FC1	122	498	3	377	1000	0.150847
Evergreen	S60T50T50	QH_3	60	50	50	QH	3	FC5	118	318	7	557	1000	0.280973
Evergreen	S60T50T50	QH_3	60	50	50	QH	3	FC10	113	222	12	653	1000	0.378073
Evergreen	S60T50T50	QH_3	60	50	50	QH	3	MTeSPS	101	84	24	791	1000	0.590521
[truncated: 4,469 more rows]
